# Supplementary material for: Disulfide-mediated ruthenium-catalyzed direct C–H thiolation in benzoxazinone systems: selective synthesis of ortho-thiolated 2-arylbenzoxazinones
Source: Royal Society of Chemistry journal article supplement (doi:10.1039/d4ob02023e), 2025-01-01
Supplement: d4ob02023e1.pdf [file d4ob02023e1.pdf]

## Supporting information

### **Disulfide mediated ruthenium catalyzed direct C-H thiolation in benzoxazinone systems: Selective synthesis of *ortho*-thiolated 2-arylbenzoxazinones**

Debabrata Patra, Mohabul Alam Mondal and Amit Saha\*

*Department of Chemistry, Jadavpur University, Kolkata 700032, India*

*E-mail: amit.saha@jadavpuruniversity.in*

| <b>Table of contents</b>                                                                | <b>Page no.</b> |
|-----------------------------------------------------------------------------------------|-----------------|
| 1. Representative experimental procedure of 2-arylbenzoxazinones.....                   | S3              |
| 2. General information .....                                                            | S3              |
| 3. Standardization of the reaction condition.....                                       | S4              |
| 4. General experimental procedures for C-H activation reactions.....                    | S5              |
| 5. Characterization Data of Synthesized Compounds.....                                  | S6-S13          |
| 6. <sup>1</sup> H, <sup>13</sup> C and <sup>19</sup> F NMR spectra of all products..... | S14-S40         |
| 7. Mass spectra of all compounds.....                                                   | S41-S50         |
| 8. LCMS and ESI-MS spectra of intermediates.....                                        | S51-S53         |
| 9. XRD Data.....                                                                        | S54-S55         |
| 10. NMR data of deuterium labelling experiment.....                                     | S56             |
| 11. Graphical presentation of KIE experiments.....                                      | S57-S58         |
| 12. References.....                                                                     | S58             |

## 1. Representative experimental procedure of 2-arylbenzoxazinones:

### Experimental procedure for 2-arylbenzoxazinones:<sup>1</sup>

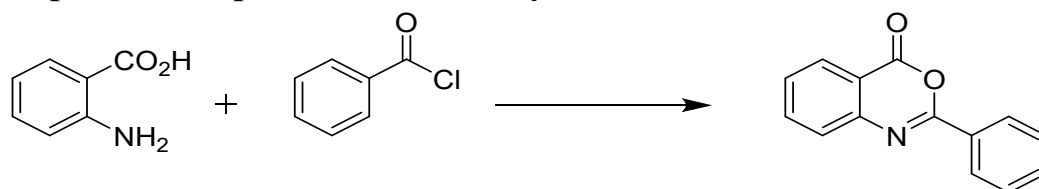

To solution of anthranilic acid (10 mmol) in pyridine (20 ml) cooled to 0 °C in an ice bath was added an acid chloride (20 mmol) drop-wise slowly and carefully with proper control. An exothermic reaction occurred. The reaction mixture was stirred by 5 min at 0 °C. The ice bath was removed and the reaction mixture was warmed slowly to room temperature. The reaction mixture was further stirred by 0.5 h at room temperature. After completion of the reaction (TLC) the mixture was poured into ice cooled water (200 mL) and the residue was collected by filtration and washed cooled water (180 mL) and dried. The crude benzoxazinones was recrystallized from ethanol.

## 2. General information:

General Information. All the commercial starting materials and reagents were used without further purification. Silica gel (silica gel, f24), TLC plates were purchased from Merck. In column chromatographic purification process, silica gel 100-200 mesh has been used. <sup>1</sup>H NMR spectra were recorded using Bruker Spectrometer at 300 MHz, 400 MHz. The <sup>19</sup>F spectra of synthesized fluorinated product was recorded in CDCl<sub>3</sub> on Bruker Spectrometer, 300 MHz 400 MHz. <sup>13</sup>C NMR spectra were recorded at 75 MHz, 100 MHz. In all NMR, CDCl<sub>3</sub> and TMS have been used as solvent and internal standard, respectively. The chemical shifts are reported in ppm scale considering standard signal of TMS at 0.00 ppm. The coupling constants (J values) are measured in Hz and splitting patterns of the proton are described as s (singlet), d (doublet), t (triplet), and m (multiplet). HRMS were measured in methanol solvent on waters Micromass Q-tof Micromass spectrometer. LCMS was recorded using COLUMN-X-Bridge-C18 (4.6 x 50 mm, 5 μm).

**Crystallographic Data Collection and Refinement Methods:** The X-ray single-crystal data for compound **3a** has been collected at room temperature in a Bruker made APEX III diffractometer. At first, single crystals of both the compounds have been isolated and then mounted on the glass fiber tip using commercial super glue. Mo-Kα radiation (λ = 0.71073 Å) from a sealed tube X-ray source has been used. The raw data have been integrated using the SAINT<sup>2</sup> program and by utilizing SADABS,<sup>3</sup> the absorption corrections were performed. The structures have been solved by SHELXL-2016/6,<sup>4</sup> and full-matrix least-squares refinements on F<sup>2</sup> for all non-hydrogen atoms were performed by SHELXL-2016/6,<sup>4</sup> with anisotropic displacement parameters. All the calculations and molecular graphics were done by SHELXL-

2016/6,<sup>4</sup> WinGX system Ver-1.80,<sup>5</sup> Diamond v3.2 and Mercury.<sup>6</sup> All the crystallographic data and structural refinement parameters for the product **3a** has been mentioned in Figure 4.

### 3. Standardization of the reaction condition:

In DMF solvent medium dimethylamino (-NMe<sub>2</sub>) group of DMF is transferred to the benzoxazinone substrate resulting formation of dimethyl benzamide derivative through cleavage of the oxazinone ring (entry 4). In DMSO solvent medium disulphide undergoes oxidation to produce sulfoxide compound (entries 5, 8, 28). Persulfate oxidant was also found to oxidise disulphide to sulfoxide compound (entries 1, 2).

### 4. General experimental procedures for C-H activation reactions:

#### Representative experimental procedure for C-H thiolated product, **3a**:

In an oven dried sealed tube (15 mL) was added 2-phenyl-4H-benzo [d] [1,3] oxazin-4-one (0.2 mmol, 45 mg), along with diphenyl disulfide (50 mg, 0.23 mmol), Ag<sub>2</sub>CO<sub>3</sub> (66 mg, 0.24 mmol), [Ru(p-cymene)Cl<sub>2</sub>]<sub>2</sub> (4.6 mg, 5 mol%) XPhos (7.2 mg, 10 mol %), AgSbF<sub>6</sub> (10 mg, 20 mol%) in dry DCE solvent (2 mL) under inert atmosphere. The resulting mixture was heated at 110 °C for 24 h. After the reaction was completed (checked by TLC), the mixture was cooled at room temperature and was extracted with ethyl acetate (3 × 20 mL) followed by washing with brine (10 mL). The combined organic layer was dried with anhydrous Na<sub>2</sub>SO<sub>4</sub> and filtered. After removal of the solvent, the residue (crude product) was purified by column chromatography over silica gel (100-200 mesh) (hexane/ethyl acetate, 98:2) to afford the desired product **3a**.

#### Representative experimental procedure for C-H selenylated product, **4a**:

In an oven dried schule tube (15 mL) was added 2-phenyl-4H-benzo [d] [1,3] oxazin-4-one (0.15 mmol, 34 mg), along with diphenyl diselenide (72 mg, 0.23 mmol), Ag<sub>2</sub> CO<sub>3</sub> (66 mg, 0.24 mmol), [Ru(p-cymene)Cl<sub>2</sub>]<sub>2</sub> (5 mol%) XPhos (10 mol %), AgSbF<sub>6</sub> (20 mol %) in dry DCE solvent (3 mL) under inert atmosphere. The resulting mixture was heated at 110 °C for 48 h. After the reaction was completed (checked by TLC), the mixture was cooled at room temperature and was extracted with ethyl acetate (3 × 20 mL) followed by washing with brine (10 mL). The combined organic layer was dried with anhydrous Na<sub>2</sub>SO<sub>4</sub> and filtered. After removal of the solvent, the residue (crude product) was purified by column chromatography over silica gel (100-200 mesh) (hexane/ethyl acetate, 99:1) to afford the desired product **4a**.

Similar procedure was followed to prepare **5a-5c** compounds by C-H thiolation of 2-arylpyridine compounds.

## 5. Characterization data of all synthesized products:

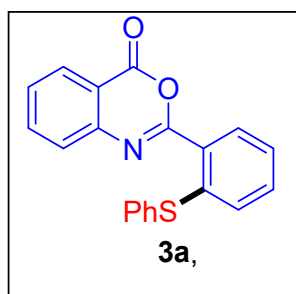

**2-(2-(phenylthio)phenyl)-4H-benzo[d][1,3]oxazin-4-one (3a, Table 2):** White solid; Yield: 78% (51 mg);  $^1\text{H}$  NMR (400 MHz,  $\text{CDCl}_3$ ):  $\delta$  8.27 (1H, dd,  $J=7.8$  Hz), 8.13-8.10 (1H, m), 7.88-7.78 (2H, m), 7.58-7.52 (3H, m), 7.42-7.40 (3H, m), 7.30-7.28 (1H, m), 7.25-7.21 (1H, m), 6.99-6.96 (1H, m).  $^{13}\text{C}$  NMR (100 MHz,  $\text{CDCl}_3$ ):  $\delta$  159.48, 156.09, 146.36, 142.03, 136.61, 135.15, 133.52, 131.73, 130.13, 129.73, 128.97, 128.71, 128.60, 127.70, 127.26, 124.93, 116.86, 100.01. HRMS (ESI)  $m/z$  calcd for  $\text{C}_{20}\text{H}_{14}\text{NO}_2\text{S}$   $[\text{M} + \text{H}]^+$ , 332.07, found 332.00.

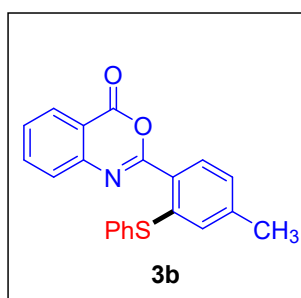

**2-(4-methyl-2-(phenylthio)phenyl)-4H-benzo[d][1,3]oxazin-4-one (3b, Table 2):** White solid; Yield: 70% (47 mg);  $^1\text{H}$  NMR (400 MHz,  $\text{CDCl}_3$ ):  $\delta$  8.25 (1H, dd,  $J=7.2$  Hz), 8.01 (1H, dd,  $J=7.5$  Hz), 7.85-7.80 (2H, m), 7.78-7.76 (3H, m), 7.57-7.39 (3H, m), 7.06-7.04 (1H, m), 6.79-6.78 (1H, m), 2.21 (3H, s).  $^{13}\text{C}$  NMR (100 MHz,  $\text{CDCl}_3$ ):  $\delta$  159.51, 156.12, 146.40, 142.76, 139.32, 139.57, 135.41, 131.66, 130.56, 130.08, 129.68, 128.57, 128.55, 128.27, 127.35, 127.26, 124.64, 116.87, 21.31. HRMS (ESI)  $m/z$  calcd for  $\text{C}_{20}\text{H}_{15}\text{NO}_2\text{SNa}$   $[\text{M} + \text{Na}]^+$ , 368.08, found 368.15.

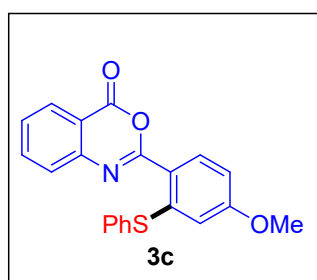

**2-(4-methoxy-2-(phenylthio)phenyl)-4H-benzo[d][1,3]oxazin-4-one (3c, Table 2):** White solid; Yield: 72% (52 mg);  $^1\text{H}$  NMR (300 MHz,  $\text{CDCl}_3$ ):  $\delta$  8.25-8.23 (1H, dd,  $J=7.8$  Hz), 8.13 (1H, dd,  $J=7.4$  Hz)

7.84-7.80 (2H, m), 7.78-7.76 (2H, m), 7.62-7.43 (4H, m), 6.75-6.72 (1H, m), 6.40-6.39 (1H, m), 3.64 (3H, s).  $^{13}\text{C}$  NMR (75 MHz,  $\text{CDCl}_3$ ):  $\delta$  162.18, 159.67, 155.87, 146.72, 144.90, 136.50, 135.67, 133.13, 131.96, 129.80, 129.29, 128.53, 128.04, 126.98, 119.69, 116.62, 113.74, 110.43, 55.18. HRMS (ESI)  $m/z$  calcd for  $\text{C}_{21}\text{H}_{16}\text{NO}_3\text{S}$   $[\text{M} + \text{H}]^+$ , 362.07, found 362.05.

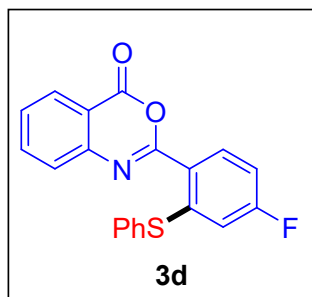

**2-(4-fluoro-2-(phenylthio)phenyl)-4H-benzo[d][1,3]oxazin-4-one (3d, Table 2):** White solid; Yield: 68% (48 mg);  $^1\text{H}$  NMR (300 MHz,  $\text{CDCl}_3$ ):  $\delta$  8.28-8.25 (1H, m), 8.17 (1H, dd,  $J=7.7$  Hz), 7.86-7.81 (2H, m), 7.79-7.60 (3H, m), 7.59-7.46 (3H, m), 6.94-6.87 (1H, m), 6.56 (1H, dd,  $J=7.2$  Hz).  $^{13}\text{C}$  NMR (75 MHz,  $\text{CDCl}_3$ ):  $\delta$  166.30, 162.92, 159.35, 155.15, 146.29, 146.27 (d,  $J_{\text{C-F}}=28$  Hz), 136.72, 135.77, 132.39, 132.26, 130.11, 129.78, 128.66, 128.63, 127.16, 116.74, 114.85 (d,  $J_{\text{C-F}}=255$  Hz), 112.12 (d,  $J_{\text{C-F}}=3$  Hz).  $^{19}\text{F}$  NMR (282 MHz,  $\text{CDCl}_3$ ) -106.06. HRMS (ESI)  $m/z$  calcd for  $\text{C}_{20}\text{H}_{13}\text{FNO}_2\text{S}$   $[\text{M} + \text{H}]^+$ , 350.05, found 350.04.

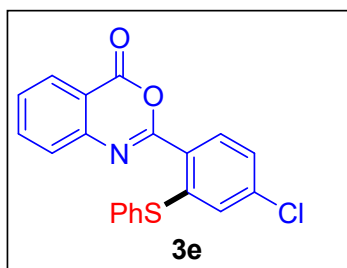

**2-(4-chloro-2-(phenylthio)phenyl)-4H-benzo[d][1,3]oxazin-4-one (3e, Table 2):** White solid; Yield: 61% (45 mg);  $^1\text{H}$  NMR (400 MHz,  $\text{CDCl}_3$ ):  $\delta$  8.26-8.25 (1H, m), 8.08 (1H, d,  $J=7.5$  Hz), 7.86-7.82 (2H, m), 7.60-7.57 (3H, m), 7.47-7.46 (3H, m), 7.21-7.19 (1H, m), 6.86-6.86 (1H, m).  $^{13}\text{C}$  NMR (100 MHz,  $\text{CDCl}_3$ ):  $\delta$  159.22, 155.21, 146.21, 144.73, 138.41, 136.69, 135.49, 132.34, 131.19, 130.06, 129.65, 128.76, 128.66, 127.73, 127.25, 125.40, 125.01, 116.83. HRMS (ESI)  $m/z$  calcd for  $\text{C}_{20}\text{H}_{13}\text{ClNO}_2\text{S}$   $[\text{M} + \text{H}]^+$ , 366.02, found 366.04.

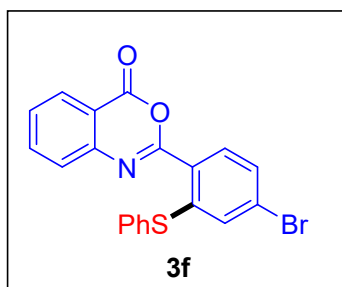

**2-(4-bromo-2-(phenylthio)phenyl)-4H-benzo[d][1,3]oxazin-4-one (3f, Table 2):** White solid; Yield: 67% (56 mg);  $^1\text{H}$  NMR (400 MHz,  $\text{CDCl}_3$ ):  $\delta$  8.26 (1H, dd,  $J=7.9$  Hz), 7.88 (1H, dd,  $J=7.3$  Hz), 7.85-7.78 (2H, m), 7.59-7.56 (3H, m), 7.54-7.45 (3H, m), 7.37-7.34 (1H, m), 7.02-7.01 (1H, m).  $^{13}\text{C}$  NMR (100 MHz,  $\text{CDCl}_3$ ):  $\delta$  159.20, 155.32, 146.20, 144.74, 136.69, 135.39, 132.40, 131.25, 130.69, 130.05, 129.62, 128.78, 128.67, 127.96, 127.26, 127.00, 125.92, 116.84. HRMS (ESI)  $m/z$  calcd for  $\text{C}_{20}\text{H}_{13}\text{BrNO}_2\text{S}$  [ $\text{M} + \text{H}$ ] $^+$ , 409.97, found 409.25.

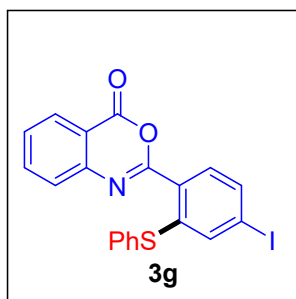

**2-(4-iodo-2-(phenylthio)phenyl)-4H-benzo[d][1,3]oxazin-4-one (3g, Table 2):** White solid; Yield: 64% (58 mg);  $^1\text{H}$  NMR (400 MHz,  $\text{CDCl}_3$ ):  $\delta$  8.26 (1H, dd,  $J=7.2$  Hz), 7.87-7.78 (3H, m), 7.58-7.54 (4H, m), 7.47-7.45 (3H, m), 7.23 (1H, d,  $J=7.8$  Hz).  $^{13}\text{C}$  NMR (100 MHz,  $\text{CDCl}_3$ ):  $\delta$  159.19, 155.51, 146.19, 144.35, 136.83, 136.67, 135.20, 133.94, 132.56, 131.07, 130.00, 129.52, 128.78, 128.66, 127.28, 126.68, 116.87, 99.49. HRMS (ESI)  $m/z$  calcd for  $\text{C}_{20}\text{H}_{13}\text{INO}_2\text{S}$  [ $\text{M} + \text{H}$ ] $^+$ , 457.96, found 457.92.

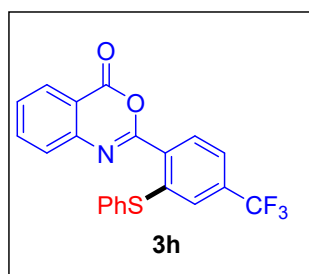

**2-(2-(phenylthio)-4-(trifluoromethyl)phenyl)-4H-benzo[d][1,3]oxazin-4-one (3h, Table 2):** White solid; Yield: 63% (50 mg);  $^1\text{H}$  NMR (400 MHz,  $\text{CDCl}_3$ ):  $\delta$  8.29 (1H, dd,  $J=7.3$  Hz), 8.23 (1H, d,  $J=7.8$  Hz), 7.90-7.81 (2H, m), 7.62-7.56 (3H, m), 7.47-7.44 (4H, m), 7.17-7.16 (1H, m).  $^{13}\text{C}$  NMR (100 MHz,  $\text{CDCl}_3$ ):  $\delta$  158.99, 154.89, 145.98, 143.98, 136.78, 135.28, 133.39, 133.07, 132.16, 130.50, 130.09, 129.73, 129.15, 128.73, 127.44, 124.99 (q,  $J_{\text{C-F}}=274$  Hz), 124.62, 121.24 (q,  $J_{\text{C-F}}=18$  Hz), 116.97.  $^{19}\text{F}$  NMR (376 MHz,  $\text{CDCl}_3$ ) -63.53. HRMS (ESI)  $m/z$  calcd for  $\text{C}_{21}\text{H}_{13}\text{F}_3\text{NO}_2\text{S}$  [ $\text{M} + \text{H}$ ] $^+$ , 400.05, found 400.07.

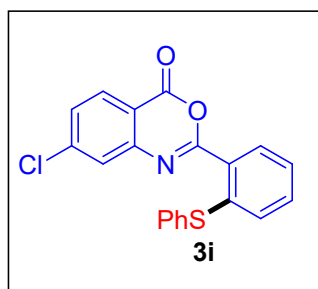

**7-chloro-2-(2-(phenylthio)phenyl)-4H-benzo[d][1,3]oxazin-4-one (3i, Table 2):** White solid; Yield: 68% (50 mg);  $^1\text{H}$  NMR (300 MHz,  $\text{CDCl}_3$ ):  $\delta$  8.19-8.17 (1H, m), 8.12-8.10 (1H, m), 7.80-7.79 (1H, m), 7.57-7.48 (3H, m), 7.43-7.41 (3H, m), 7.30-7.28 (1H, m), 7.25-7.21 (1H, m), 6.98-6.96 (1H, m).  $^{13}\text{C}$  NMR (75 MHz,  $\text{CDCl}_3$ ):  $\delta$  158.67, 157.19, 147.41, 143.04, 142.58, 135.19, 133.33, 132.06, 131.65, 130.25, 129.87, 129.78, 129.10, 129.07, 128.70, 127.03, 124.90, 115.21. HRMS (ESI)  $m/z$  calcd for  $\text{C}_{20}\text{H}_{13}\text{ClNO}_2\text{S}$   $[\text{M} + \text{H}]^+$ , 366.02, found 366.04.

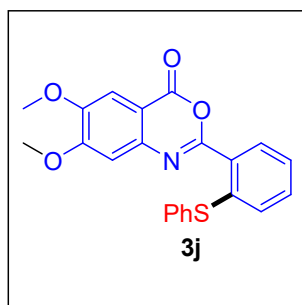

**6,7-dimethoxy-2-(2-(phenylthio)phenyl)-4H-benzo[d][1,3]oxazin-4-one (3j, Table 2):** White solid; Yield: 65% (51 mg);  $^1\text{H}$  NMR (400 MHz,  $\text{CDCl}_3$ ):  $\delta$  8.10-8.08 (1H, m), 7.59-7.56 (3H, m), 7.41-7.40 (3H, m), 7.24-7.22 (2H, m), 7.20-7.18 (1H, m), 6.98-6.96 (1H, m), 4.04 (3H, s), 4.01 (3H, s).  $^{13}\text{C}$  NMR (100 MHz,  $\text{CDCl}_3$ ):  $\delta$  159.42, 156.54, 155.53, 150.01, 142.71, 141.54, 135.15, 133.56, 131.44, 129.94, 129.71, 128.94, 128.61, 127.89, 124.91, 109.47, 108.16, 107.63, 56.59, 56.47. HRMS (ESI)  $m/z$  calcd for  $\text{C}_{22}\text{H}_{18}\text{NO}_4\text{S}$   $[\text{M} + \text{H}]^+$ , 392.08, found 392.05.

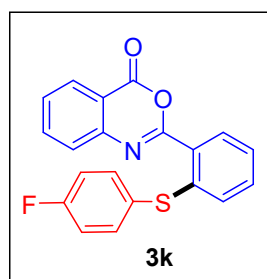

**2-(2-((4-fluorophenyl)thio)phenyl)-4H-benzo[d][1,3]oxazin-4-one (3k, Table 2):** White solid; Yield: 62% (45 mg);  $^1\text{H}$  NMR (300 MHz,  $\text{CDCl}_3$ ):  $\delta$  8.25 (1H, dd,  $J=7.6$  Hz), 8.14-8.11 (1H, m), 7.88-7.79 (2H, m), 7.57-7.54 (3H, m), 7.31-7.27 (1H, m), 7.25-7.22 (1H, m), 7.15-7.10 (2H, m), 6.92-6.89 (1H, m).  $^{13}\text{C}$  NMR (75 MHz,  $\text{CDCl}_3$ ):  $\delta$  164.62, 162.13, 159.38, 156.00, 146.31, 142.13, 137.42 (d,  $J_{\text{C-F}}=272$  Hz),



136.61, 131.79, 130.17, 128.73(d,  $J_{C-F}=6$  Hz), 128.63 (d,  $J_{C-F}=55$  Hz), 128.22, 127.52, 127.21, 124.94, 117.08, 116.87.  $^{19}\text{F}$  NMR (282 MHz,  $\text{CDCl}_3$ ) -111.48. HRMS (ESI)  $m/z$  calcd for  $\text{C}_{20}\text{H}_{13}\text{FNO}_2\text{S}$   $[\text{M} + \text{H}]^+$ , 350.05, found 350.11.

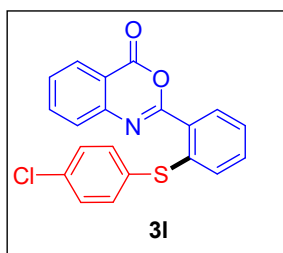

**2-(2-((4-chlorophenyl)thio)phenyl)-4H-benzo[d][1,3]oxazin-4-one (3l, Table 2):** White solid; Yield: 66% (48 mg);  $^1\text{H}$  NMR (400 MHz,  $\text{CDCl}_3$ ):  $\delta$  8.28-8.25 (1H, m), 8.13-8.10 (1H, m), 7.88-7.77 (2H, m), 7.58-7.50 (3H, m), 7.48-7.37 (2H, m), 7.31-7.27 (1H, m), 7.26-7.25 (1H, m), 6.97-6.94 (1H, m).  $^{13}\text{C}$  NMR (100 MHz,  $\text{CDCl}_3$ ):  $\delta$  159.42, 155.94, 146.24, 141.36, 136.68, 136.33, 135.30, 132.21, 131.87, 130.20, 129.98, 128.72, 128.70, 128.64, 127.84, 127.22, 125.23, 116.82. HRMS (ESI)  $m/z$  calcd for  $\text{C}_{20}\text{H}_{13}\text{ClNO}_2\text{S}$   $[\text{M} + \text{H}]^+$ , 366.02, found 366.02.

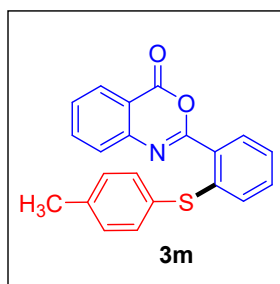

**2-(2-(p-tolylthio)phenyl)-4H-benzo[d][1,3]oxazin-4-one (3m, Table 2):** White solid; Yield: 65% (45 mg);  $^1\text{H}$  NMR (400 MHz,  $\text{CDCl}_3$ ):  $\delta$  8.27 (1H, dd,  $J=7.5$  Hz), 8.10 (1H, dd,  $J=7.8$  Hz), 7.87-7.83 (2H, m), 7.81-7.79 (1H, m), 7.57-7.53 (2H, m), 7.47-7.19 (4H, m), 6.94 (1H, dd,  $J=7.4$  Hz), 2.39 (3H, s).  $^{13}\text{C}$  NMR (100 MHz,  $\text{CDCl}_3$ ):  $\delta$  159.51, 156.12, 146.40, 142.76, 139.32, 136.57, 135.41, 131.66, 130.56, 130.08, 129.68, 128.57, 128.55, 128.27, 127.35, 127.26, 124.64, 116.87, 21.31. HRMS (ESI)  $m/z$  calcd for  $\text{C}_{21}\text{H}_{14}\text{NO}_2\text{S}$   $[\text{M} + \text{H}]^+$ , 346.08, found 346.10.

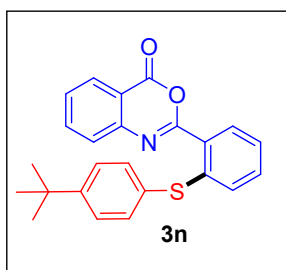

**2-(2-((4-(tert-butyl)phenyl)thio)phenyl)-4H-benzo[d][1,3]oxazin-4-one (3n, Table 2):** White solid; Yield: 67% (52 mg);  $^1\text{H}$  NMR (400 MHz,  $\text{CDCl}_3$ ):  $\delta$  8.26 (1H, dd,  $J=7.6$  Hz), 8.09 (1H, dd,  $J=7.1$  Hz), 7.86-7.77 (2H, m), 7.56-7.40 (5H, m), 7.31-7.27 (1H, m), 7.24-7.01 (1H, m), 6.99-6.99 (1H, m), 1.22 (9H, s).  $^{13}\text{C}$  NMR (100 MHz,  $\text{CDCl}_3$ ):  $\delta$  167.70, 159.52, 156.19, 152.39, 146.40, 142.49, 136.58, 134.95,

131.68, 130.93, 130.14, 128.86, 128.56, 128.50, 127.25, 126.79, 124.73, 116.84, 34.77, 31.25, 27.74, 19.17. HRMS (ESI)  $m/z$  calcd for  $C_{24}H_{22}NO_2S$   $[M + H]^+$ , 388.12, found 388.15.

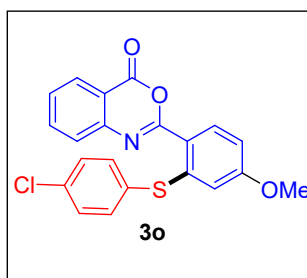

**2-(2-((4-chlorophenyl)thio)-4-methoxyphenyl)-4H-benzo[d][1,3]oxazin-4-one (3o, Table 2):**

White solid; Yield: 60% (48 mg);  $^1H$  NMR (300 MHz,  $CDCl_3$ ):  $\delta$  8.24 (1H, dd,  $J=7.3$  Hz), 8.14 (1H, d,  $J=7.6$  Hz), 7.83-7.81 (1H, m), 7.77-7.76 (1H, m), 7.54-7.51 (3H, m), 7.42-7.40 (2H, m), 6.77-6.74 (1H, m), 6.39-6.38 (1H, m), 3.69 (3H, s).  $^{13}C$  NMR (75 MHz,  $CDCl_3$ ):  $\delta$  162.24, 159.62, 155.74, 146.62, 144.07, 136.79, 136.57, 135.63, 132.08, 131.80, 130.06, 128.58, 128.15, 126.94, 119.87, 116.60, 114.10, 110.31, 55.33. HRMS (ESI)  $m/z$  calcd for  $C_{21}H_{15}ClNO_3S$   $[M + H]^+$ , 396.03, found 396.13.

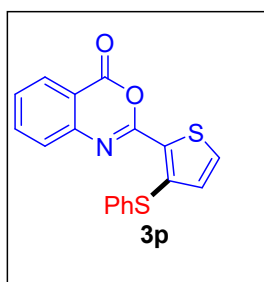

**2-(3-(phenylthio)thiophen-2-yl)-4H-benzo[d][1,3]oxazin-4-one (3p, Table 2):**

White solid; Yield: 54% (36 mg);  $^1H$  NMR (400 MHz,  $CDCl_3$ ):  $\delta$  8.22 (1H, dd,  $J = 7.9$  Hz), 7.84-7.80 (1H, m), 7.73-7.70 (1H, dd,  $J = 8.2$  Hz), 7.68 – 7.61 (2H, m), 7.53 – 7.41 (4H, m), 7.36 (1H, d,  $J = 5.3$  Hz), 6.41 (d,  $J = 5.3$  Hz, 1H).  $^{13}C$  NMR (100 MHz,  $CDCl_3$ ):  $\delta$  158.95, 153.58, 147.11, 143.60, 136.63, 134.99, 132.82, 130.09, 129.70, 129.40, 128.89, 128.74, 127.79, 126.88, 121.92, 116.23. HRMS (ESI)  $m/z$  calcd for  $C_{18}H_{12}NO_2S_2$   $[M + H]^+$ , 338.02, found 338.02.

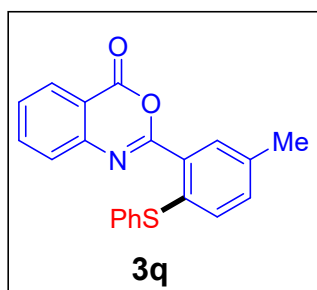

**2-(5-methyl-2-(phenylthio)phenyl)-4H-benzo[d][1,3]oxazin-4-one (3q, Table 2):**

White solid; Yield: 66% (44 mg);  $^1H$  NMR (400 MHz,  $CDCl_3$ ):  $\delta$  8.26 (1H, dd,  $J=7.3$  Hz), 7.91 (1H, s), 7.86-7.76 (2H, m), 7.56-7.51 (3H, m), 7.39-7.33 (3H, m), 7.12-7.09 (1H, m), 6.92-6.90 (1H, m), 2.36 (3H, s).  $^{13}C$  NMR (100 MHz,  $CDCl_3$ ):  $\delta$  159.60, 156.29, 146.41, 138.09, 136.60, 135.15, 134.62, 134.19, 132.18, 130.55,

129.59, 129.37, 129.32, 128.61, 128.55, 128.01, 127.24, 116.79, 20.69. HRMS (ESI)  $m/z$  calcd for  $C_{20}H_{15}NO_2S$   $[M + H]^+$ , 346.08, found 346.09.

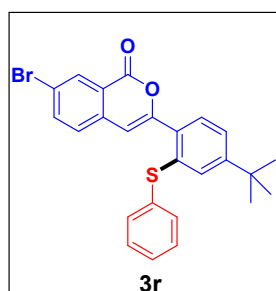

**7-bromo-3-(4-(tert-butyl)-2-(phenylthio)phenyl)-1H-isochromen-1-one (3r, Table 2):** White solid; Yield: 58% (49 mg);  $^1H$  NMR (400 MHz,  $CDCl_3$ ):  $\delta$  8.37 (1H, d,  $J=6.8$  Hz), 8.05-8.03 (1H, m), 7.92-7.89 (1H, m), 7.67-7.65 (1H, m), 7.57-7.54 (2H, m), 7.42-7.41 (3H, m), 7.25-7.22 (1H, m), 6.98-6.97 (1H, d,  $J=6.7$  Hz) 1.12 (9H, s).  $^{13}C$  NMR (100 MHz,  $CDCl_3$ ):  $\delta$  158.40, 156.41, 155.56, 145.43, 141.84, 139.66, 135.07, 133.71, 131.02, 129.99, 129.64, 128.95, 128.87, 126.22, 124.47, 122.28, 121.54, 118.13, 35.10, 30.83, 30.68, 22.71 HRMS (ESI)  $m/z$  calcd for  $C_{25}H_{21}BrO_2S$   $[M + H]^+$  466.04, found 466.03.

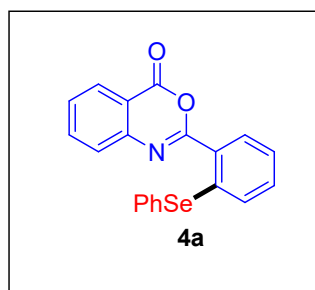

**2-(2-(phenylselanyl)phenyl)-4H-benzo[d][1,3]oxazin-4-one (4a, Table 2):** White solid; Yield: 64% (37 mg);  $^1H$  NMR (400 MHz,  $CDCl_3$ ):  $\delta$  8.29-8.24 (2H, m), 7.91-7.81 (2H, m), 7.77-7.70 (2H, m), 7.58-7.53 (1H, m), 7.47-7.42 (3H, m), 7.29-7.26 (1H, m), 7.25-7.19 (1H, m), 7.04 (1H, dd,  $J=8.0$  Hz).  $^{13}C$  NMR (100 MHz,  $CDCl_3$ ):  $\delta$  159.33, 156.01, 146.12, 139.59, 137.27, 136.69, 131.97, 130.50, 130.03, 130.00, 129.82, 129.16, 128.73, 128.57, 127.65, 126.95, 125.22, 116.81. HRMS (ESI)  $m/z$  calcd for  $C_{20}H_{14}NO_2Se$   $[M + H]^+$ , 380.07, found 380.06.

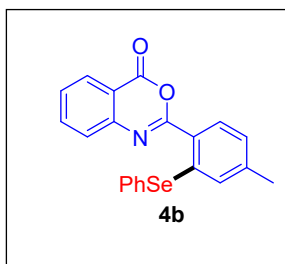

**2-(5-methyl-2-(phenylselanyl)phenyl)-4H-benzo[d][1,3]oxazin-4-one (4b)**: White solid; Yield: 58% (34 mg);  $^1\text{H}$  NMR (400 MHz,  $\text{CDCl}_3$ ):  $\delta$  8.26 (1H, dt,  $J = 7.8$  Hz), 8.14 (1H, d,  $J = 8.1$  Hz), 7.93 – 7.79 (2H, m), 7.77 – 7.62 (2H, m), 7.59 – 7.35 (4H, m), 7.21 – 7.01 (1H, m), 6.89 – 6.79 (1H, m),  $^{13}\text{C}$  NMR (75 MHz,  $\text{CDCl}_3$ )  $\delta$  146.30, 142.76, 139.41, 137.21, 136.93, 136.64, 130.45, 129.94, 129.75, 129.57, 129.09, 128.69, 128.32, 126.84, 126.32, 125.01, 116.72, 100.01, 21.46. HRMS (ESI)  $m/z$  calcd for  $\text{C}_{21}\text{H}_{16}\text{NO}_2\text{Se}$   $[\text{M} + \text{H}]^+$ , 394.02, found 394.06.

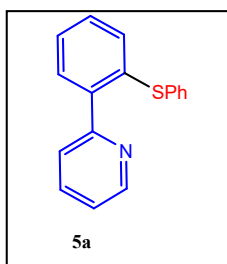

**2-(2-(phenylthio)phenyl)pyridine (5a)**<sup>7</sup>: Colourless oil: 89% (70 mg);  $^1\text{H}$  NMR (400 MHz,  $\text{CDCl}_3$ ):  $\delta$  8.72-8.69 (1H, m), 7.78-7.73 (1H, m), 7.62-7.53 (2H, m), 7.35-7.22 (9H, m),  $^{13}\text{C}$  NMR (100 MHz,  $\text{CDCl}_3$ )  $\delta$  157.95, 148.68, 140.75, 136.37, 135.51, 135.41, 132.07, 131.51, 130.45, 129.22, 129.16, 127.32, 126.85, 125.51, 122.29.

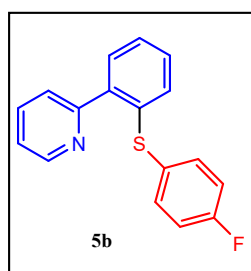

**2-(2-(4-fluorophenylthio)phenyl)pyridine(5b)**<sup>8</sup>: White solid: 78% (43.8 mg);  $^1\text{H}$  NMR (400 MHz,  $\text{CDCl}_3$ ):  $\delta$  8.71 (1H, d,  $J=4.6$  Hz), 7.78-7.74 (1H, m), 7.58 (1H, d,  $J=7.6$  Hz), 7.52-7.50 (1H, m), 7.34-7.23 (5H, m), 7.14-7.11 (1H, m), 7.00-6.96 (2H, m),  $^{13}\text{C}$  NMR (100 MHz,  $\text{CDCl}_3$ )  $\delta$  162.51, (d,  $J_{\text{C-F}}=246.2$  Hz), 158.09, 148.88, 140.31, 136.27, 135.02 (d,  $J_{\text{C-F}}=2.2$  Hz), 130.34, 130.31, 130.18, 130.14, 129.05, 129.49, 124.24, 122.27, 116.42 (d,  $J_{\text{C-F}}=18.6$  Hz),  $^{19}\text{F}$  NMR (376 MHz,  $\text{CDCl}_3$ ) -113.63.

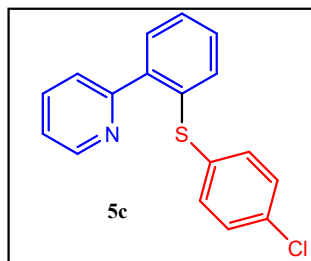

**2-(2-((4-chlorophenyl)thio)phenyl)pyridine(5c)<sup>8</sup>**: Colourless oil: 68% (40 mg); <sup>1</sup>H NMR (400 MHz, CDCl<sub>3</sub>): δ 8.72 (1H, d, J=4.8 Hz), 7.82–7.78 (1H, m), 7.61-7.56 (2H, m), 7.36-7.30 (2H, m), 7.27-7.25 (3H, m), 7.22-7.19 (3H, m), <sup>13</sup>C NMR (100 MHz, CDCl<sub>3</sub>) δ 136.88, 134.82, 134.22, 133.38, 133.06, 131.84, 130.69, 129.49, 129.44, 129.39, 129.32, 127.37, 127.33, 124.66, 122.56.

## 6. Characterization data of all synthesized products:

$^1\text{H}$  NMR (400 MHz,  $\text{CDCl}_3$ ) and  $^{13}\text{C}$  NMR (100 MHz,  $\text{CDCl}_3$ ) spectrum of 3a

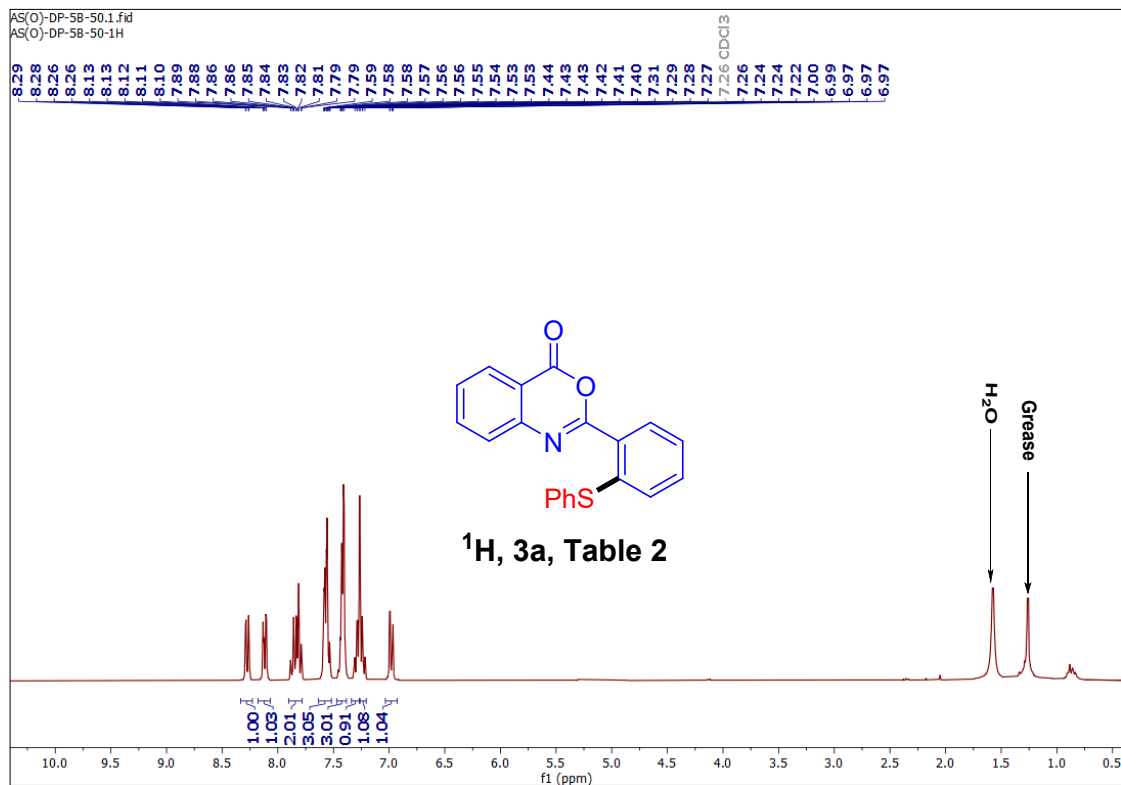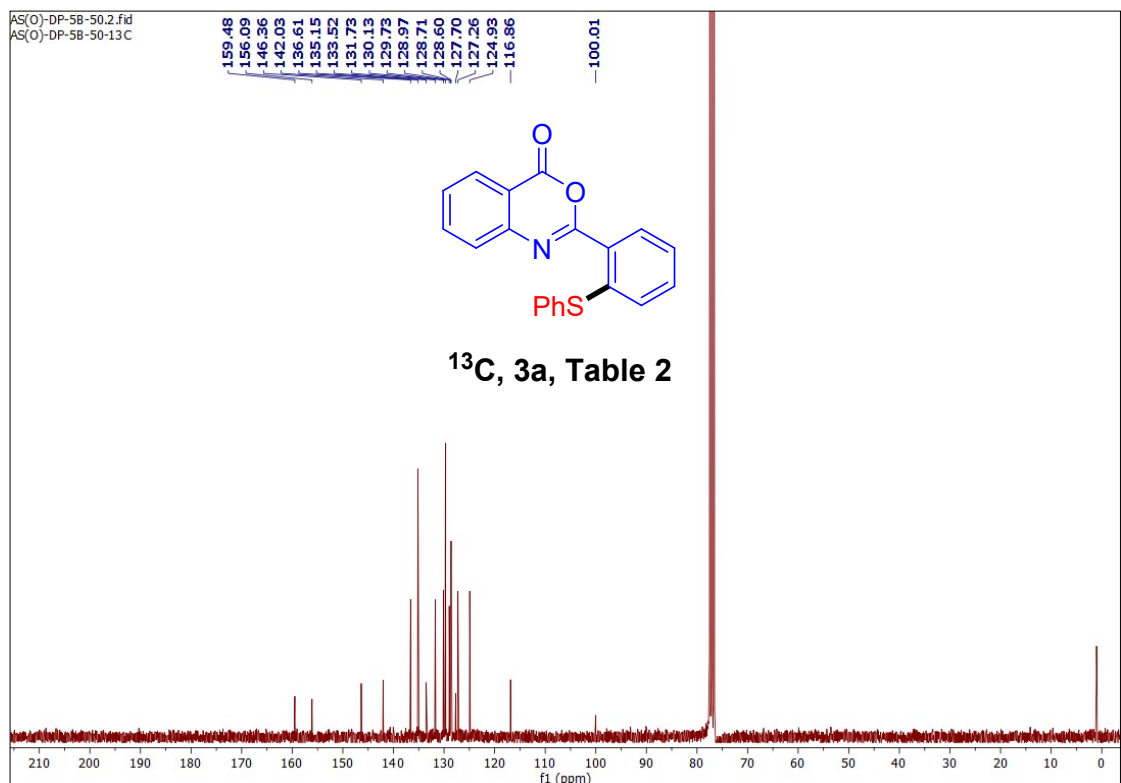

**$^1\text{H}$  NMR (400 MHz,  $\text{CDCl}_3$ ) and  $^{13}\text{C}$  NMR (100 MHz,  $\text{CDCl}_3$ ) spectrum of 3b**

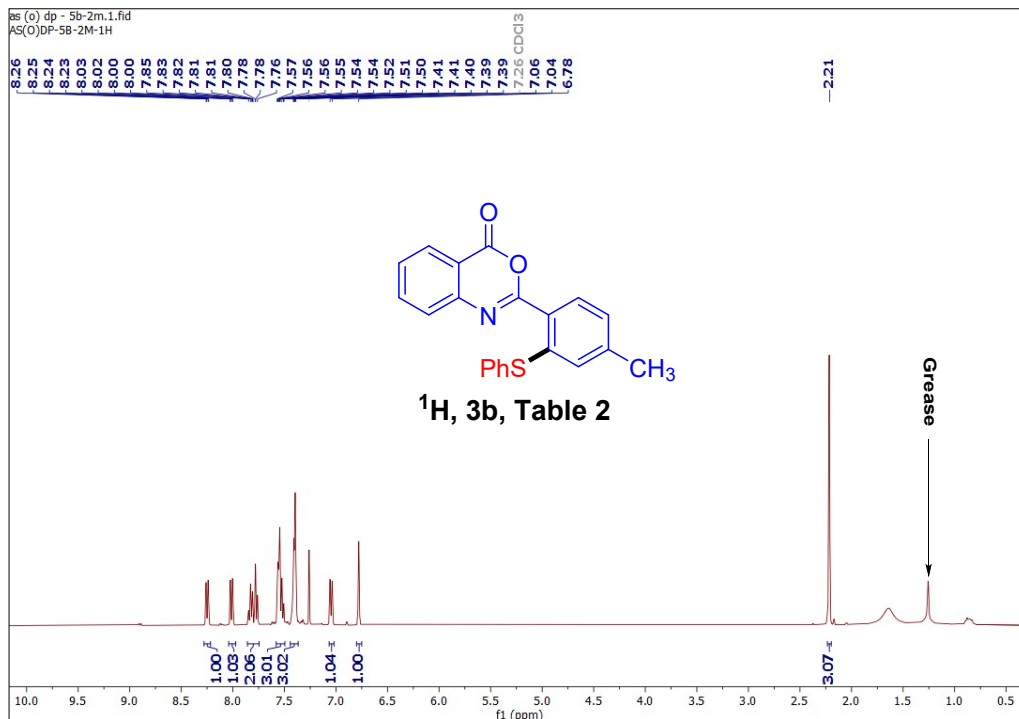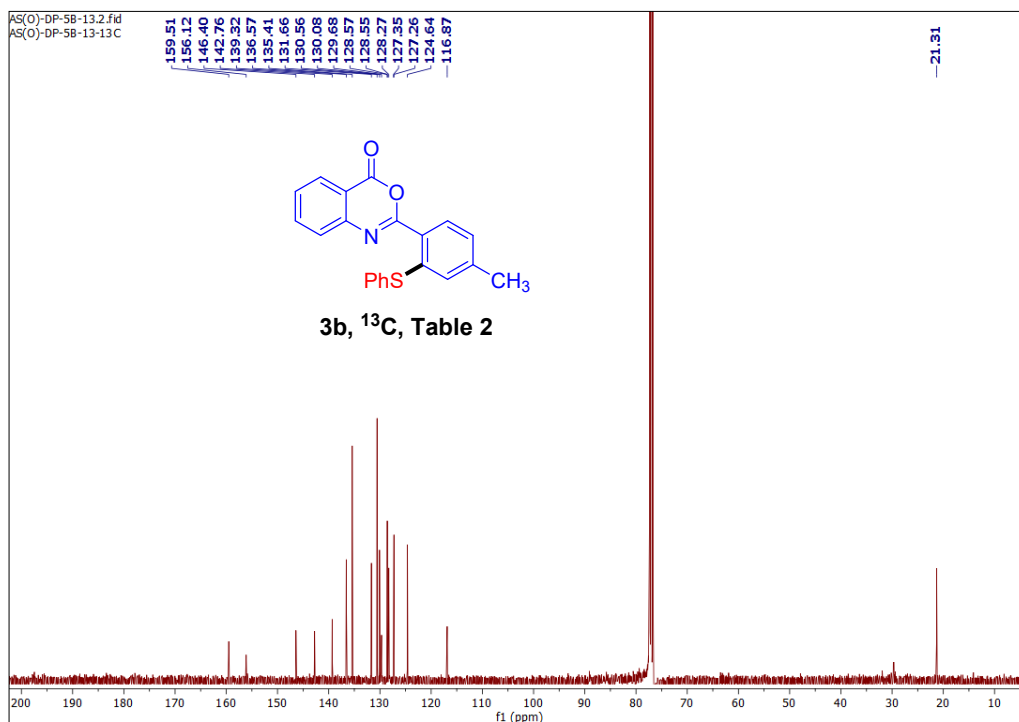

**$^1\text{H}$  NMR (300 MHz,  $\text{CDCl}_3$ ) and  $^{13}\text{C}$  NMR (75 MHz,  $\text{CDCl}_3$ ) spectrum of 3c**

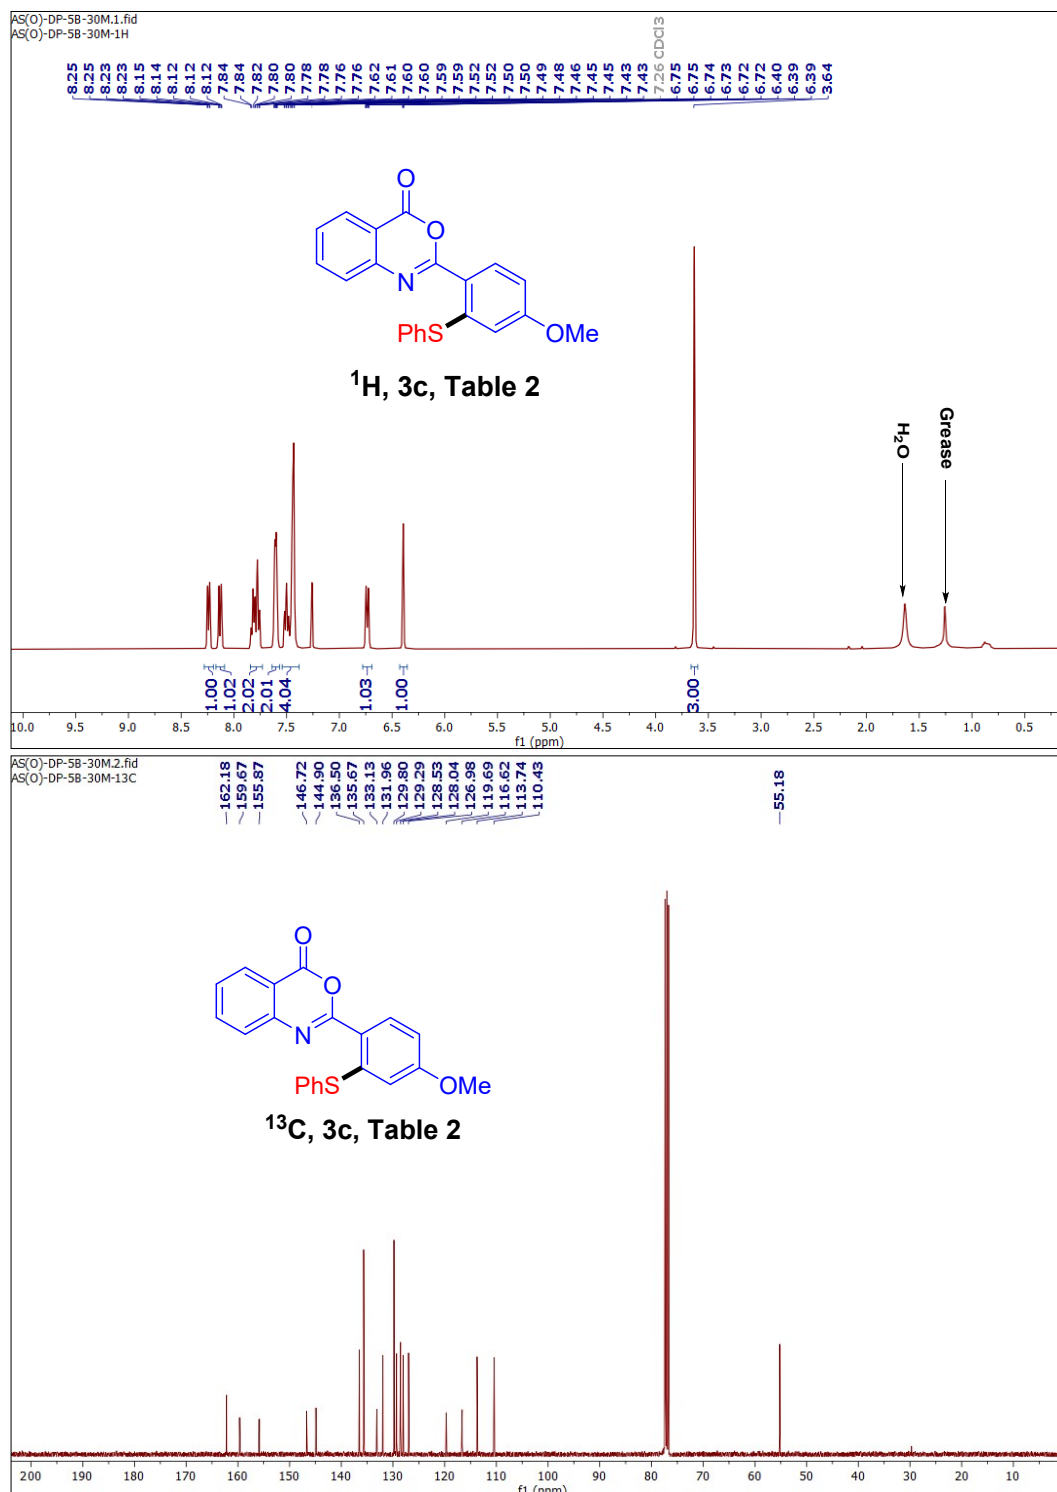



# $^1\text{H}$ NMR (300 MHz, $\text{CDCl}_3$ ) and $^{13}\text{C}$ NMR (75 MHz, $\text{CDCl}_3$ ) spectrum of 3d

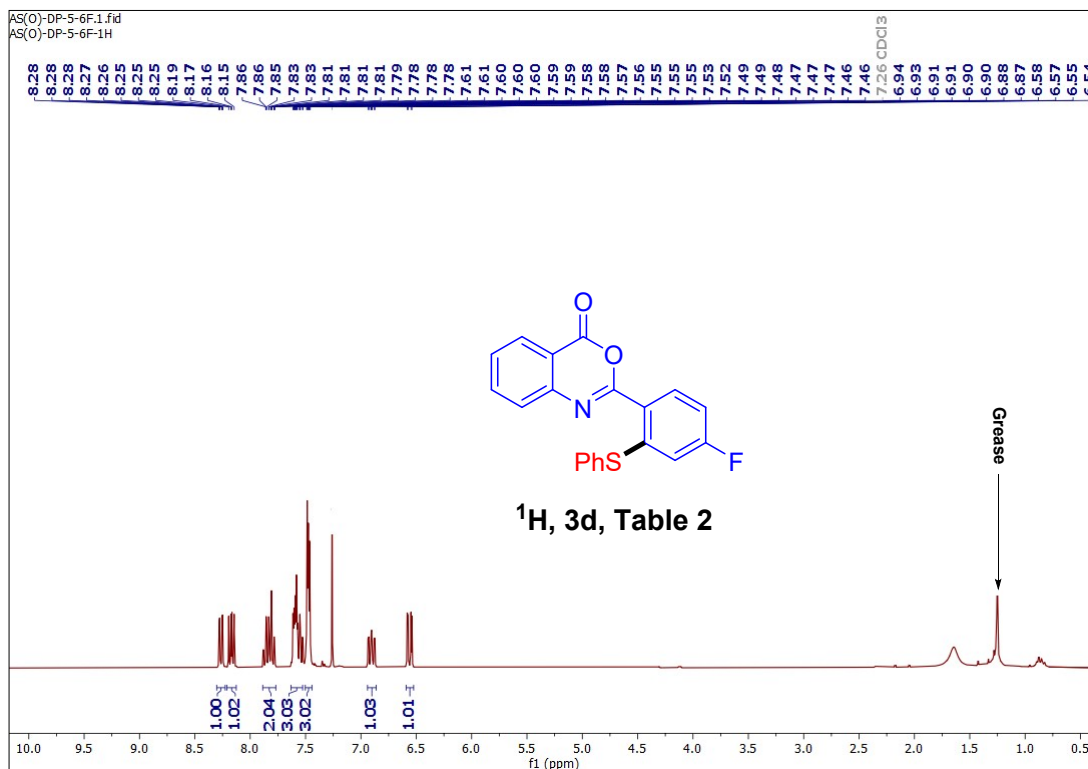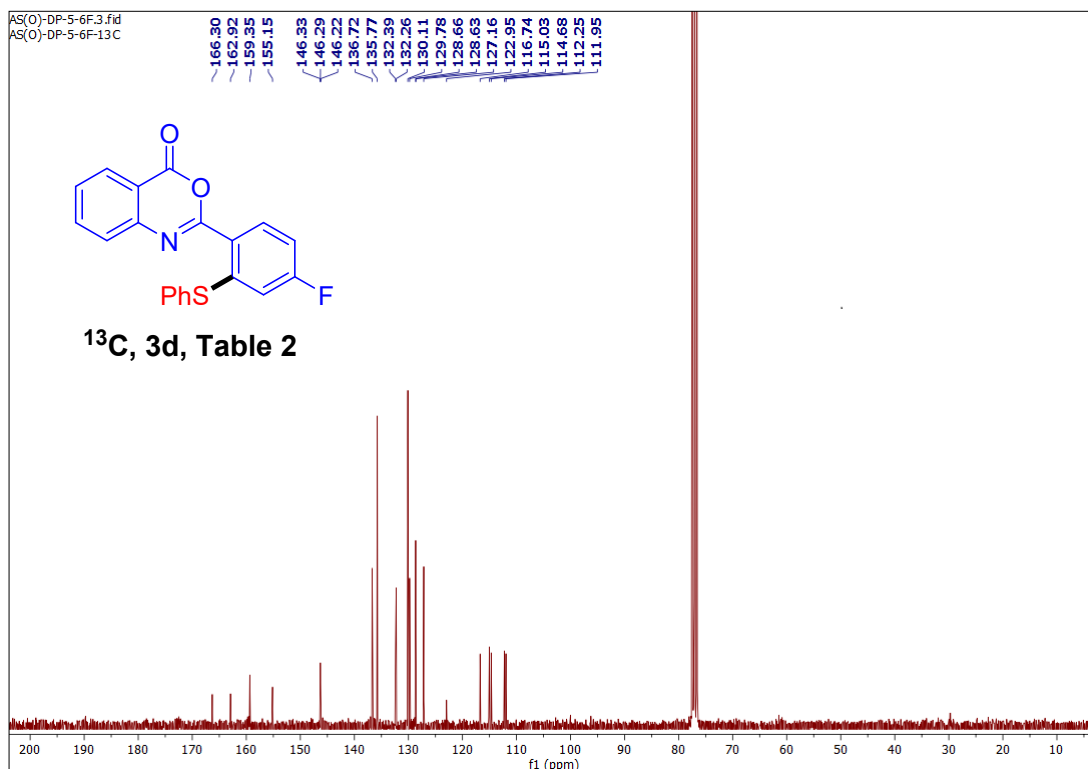

# $^{19}\text{F}$ NMR (282 MHz, $\text{CDCl}_3$ ) spectrum of 3d

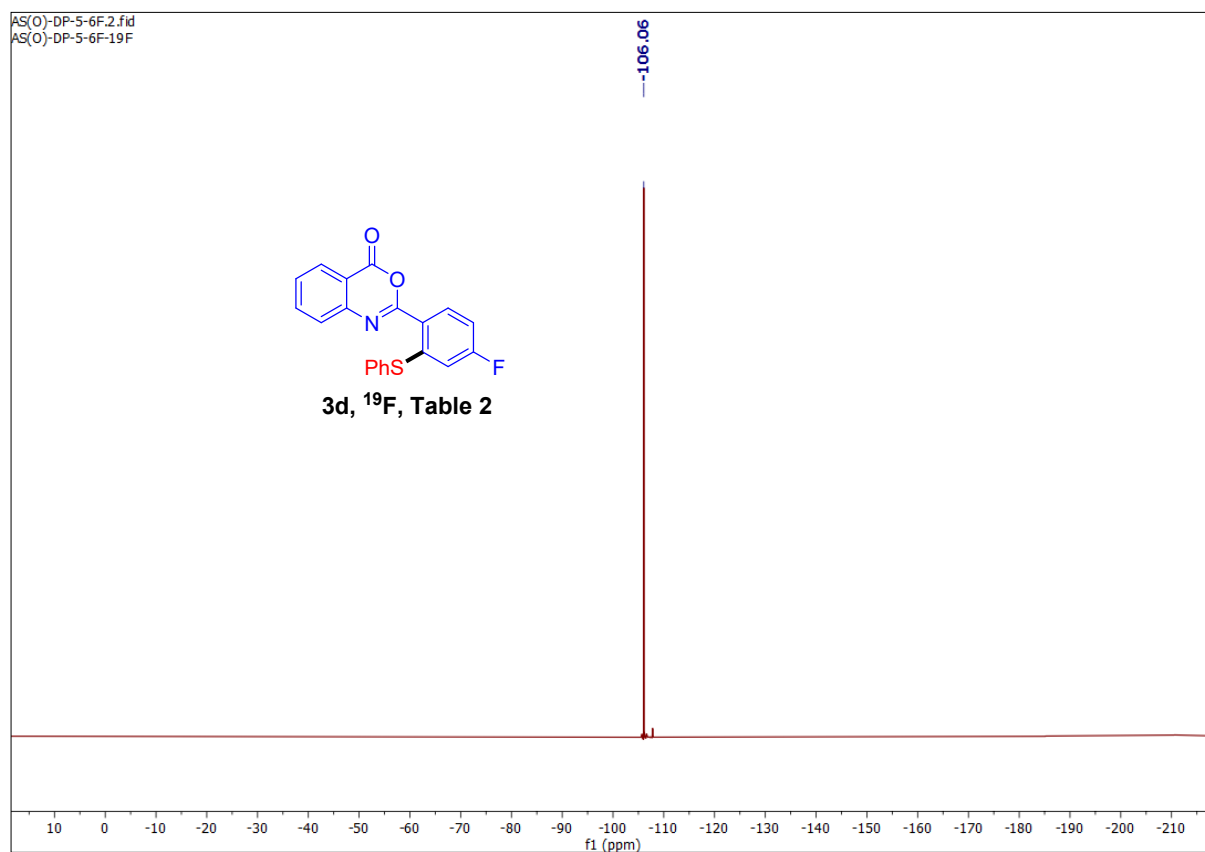

**$^1\text{H}$  NMR (400 MHz,  $\text{CDCl}_3$ ) and  $^{13}\text{C}$  NMR (100 MHz,  $\text{CDCl}_3$ ) spectrum of 3e**

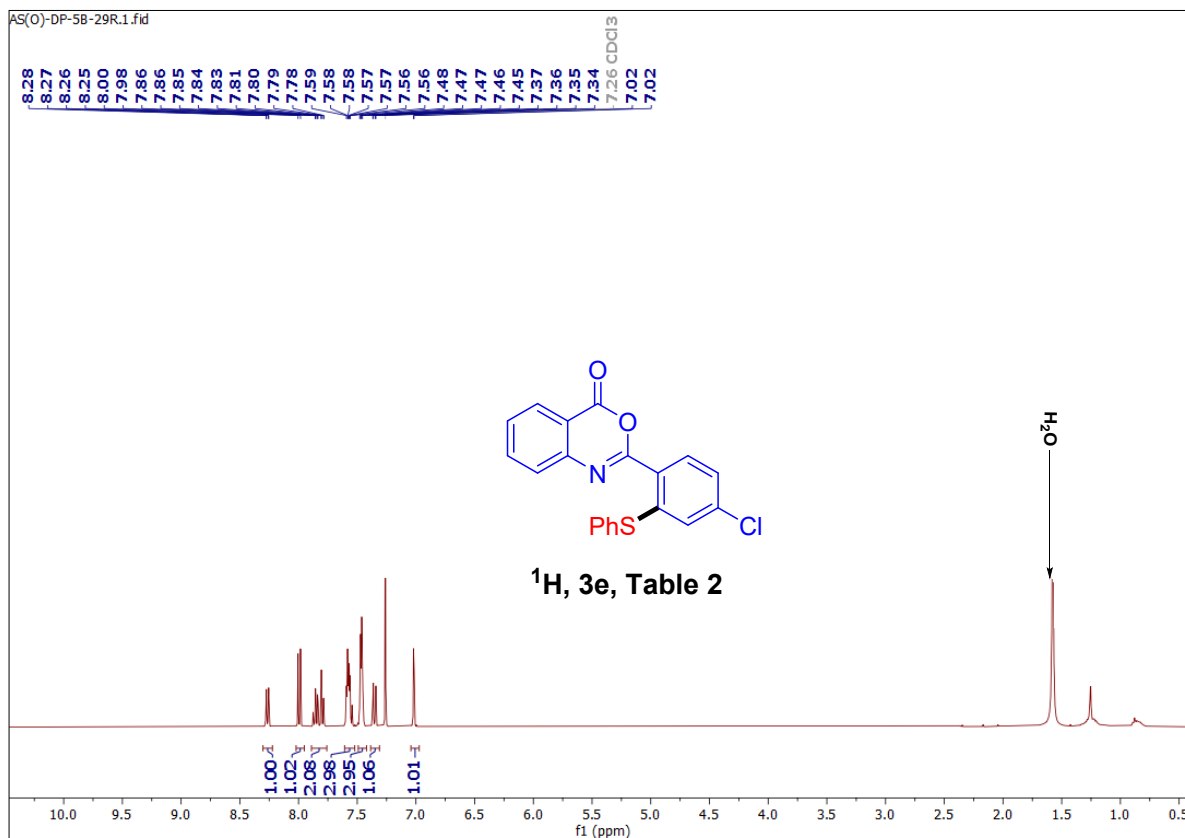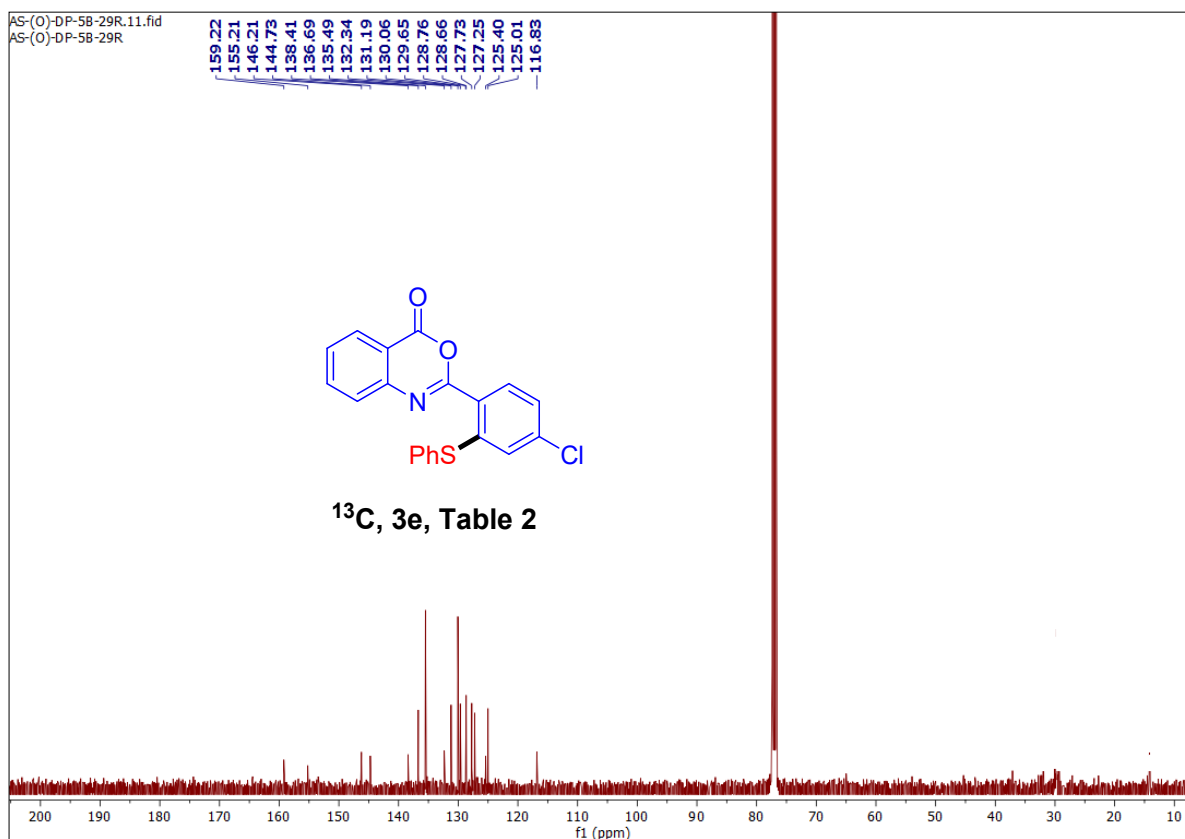

# $^1\text{H}$ NMR (400 MHz, $\text{CDCl}_3$ ) and $^{13}\text{C}$ NMR (100 MHz, $\text{CDCl}_3$ ) spectrum of **3f**

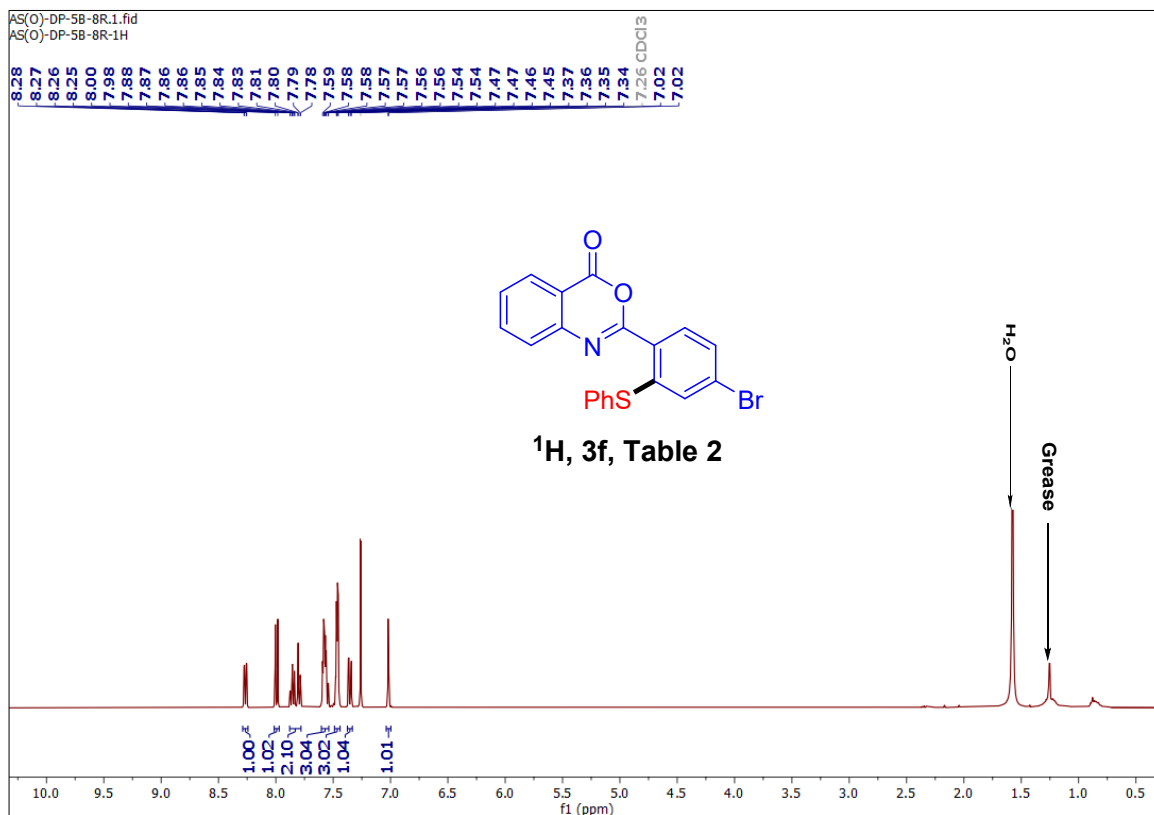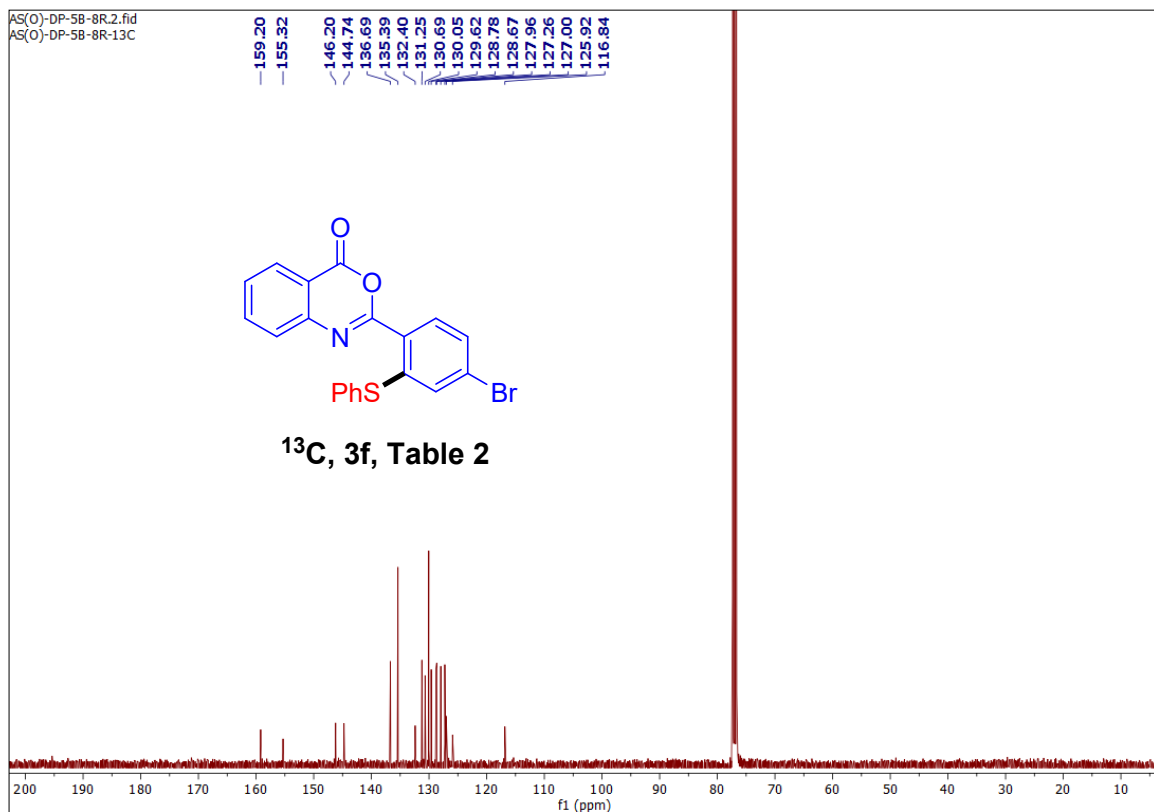

**$^1\text{H}$  NMR (400 MHz,  $\text{CDCl}_3$ ) and  $^{13}\text{C}$  NMR (100 MHz,  $\text{CDCl}_3$ ) spectrum of 3g**

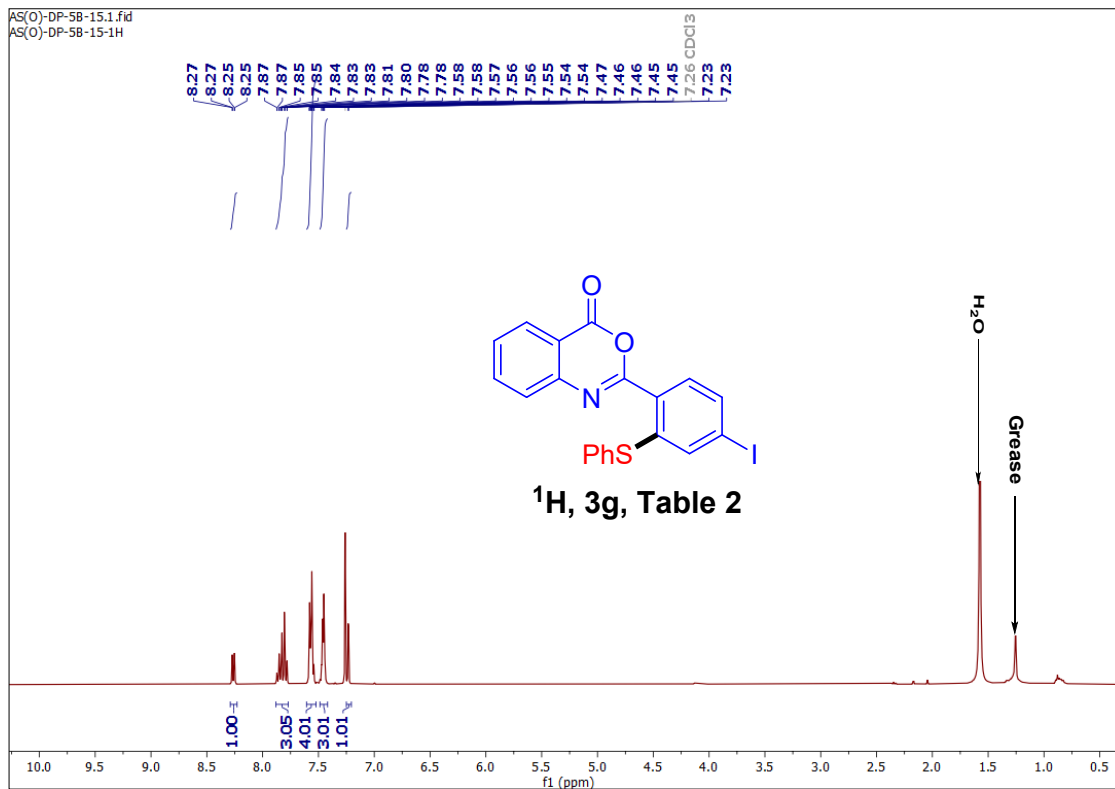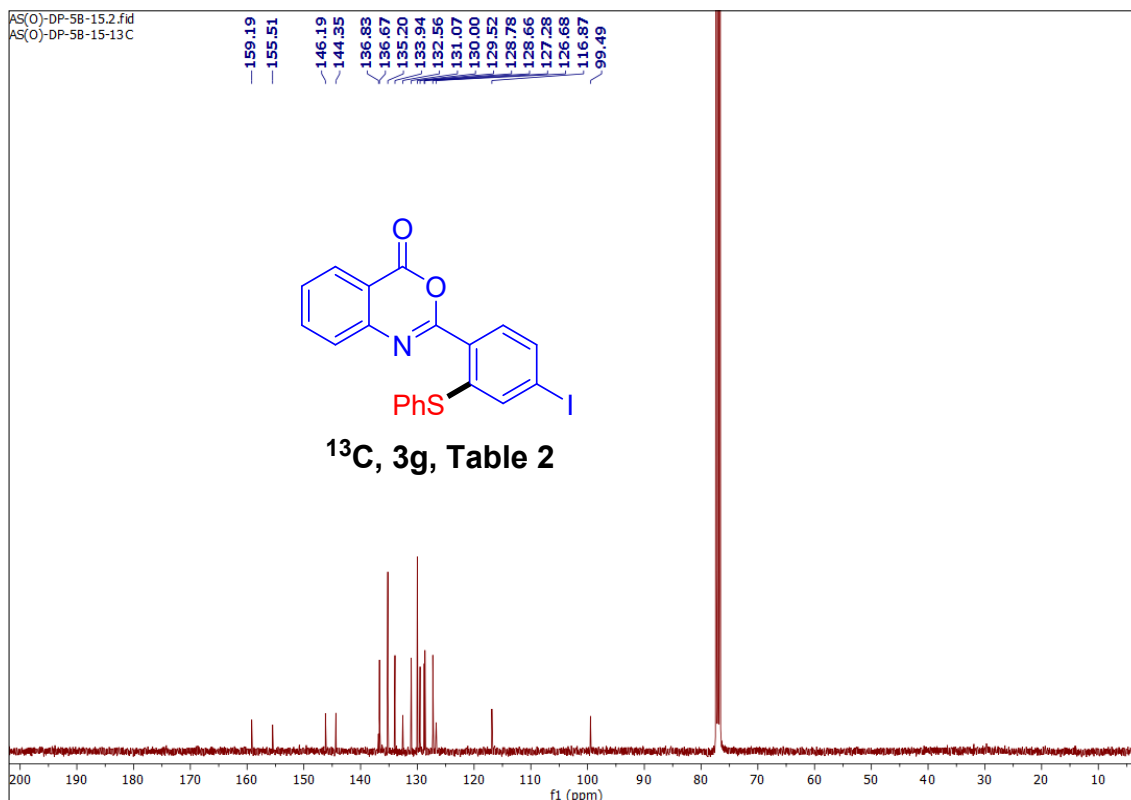

**$^1\text{H}$  NMR (400 MHz,  $\text{CDCl}_3$ ) and  $^{13}\text{C}$  NMR (100 MHz,  $\text{CDCl}_3$ ) spectrum of 3h**

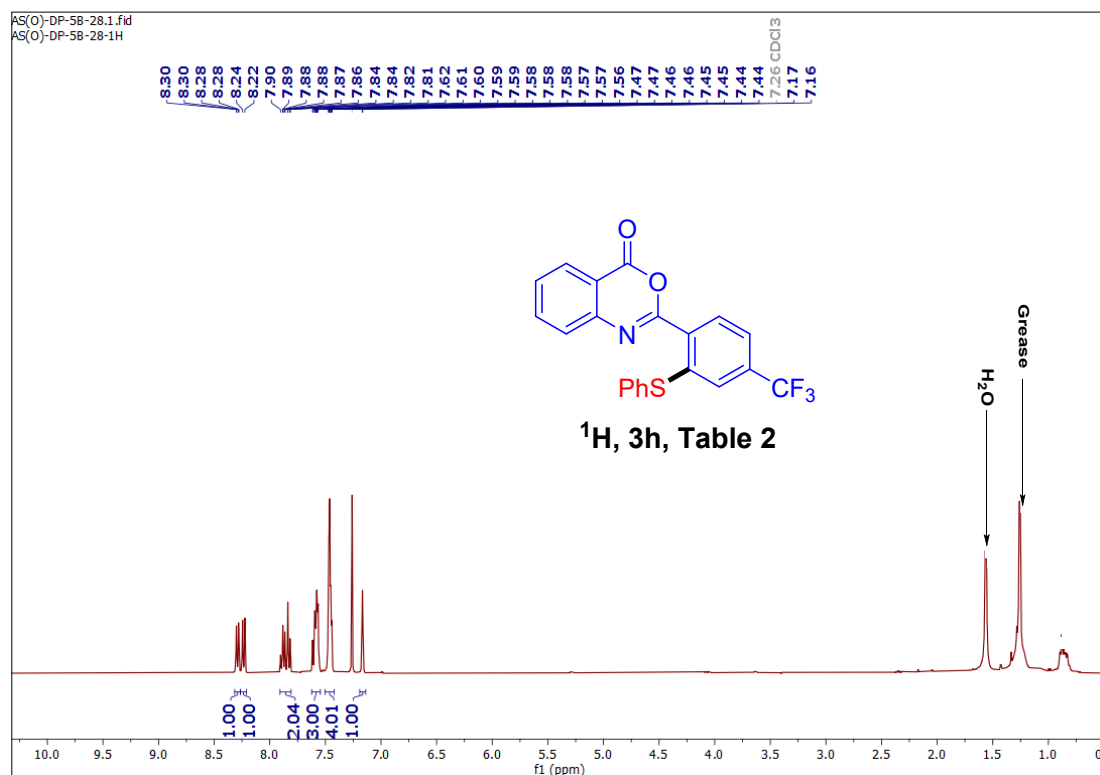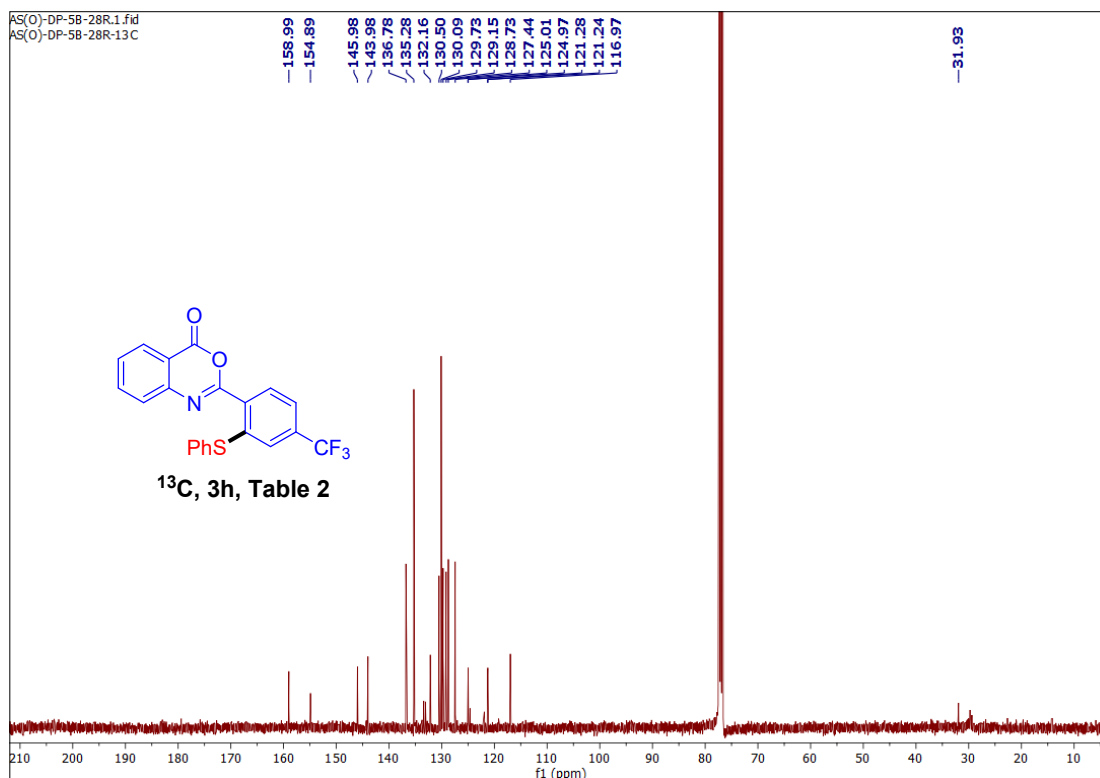

**$^{19}\text{F}$  NMR (376 MHz,  $\text{CDCl}_3$ ) spectrum of 3h**

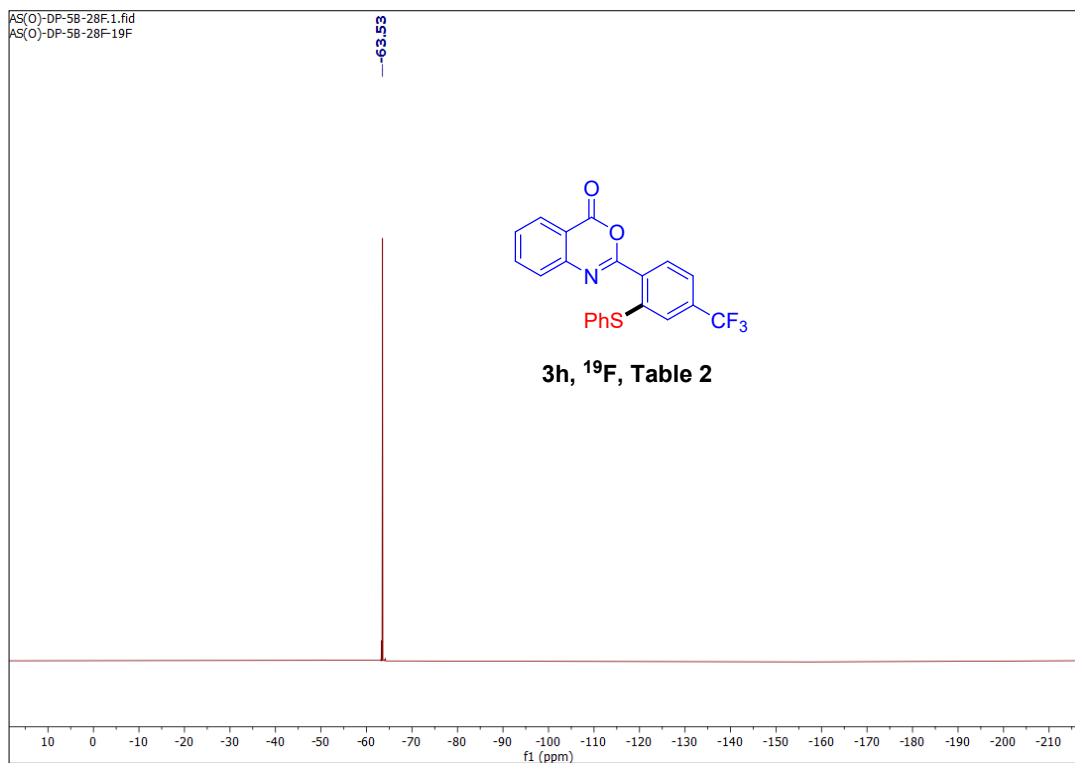

# $^1\text{H}$ NMR (300 MHz, $\text{CDCl}_3$ ) and $^{13}\text{C}$ NMR (75 MHz, $\text{CDCl}_3$ ) spectrum of 3i

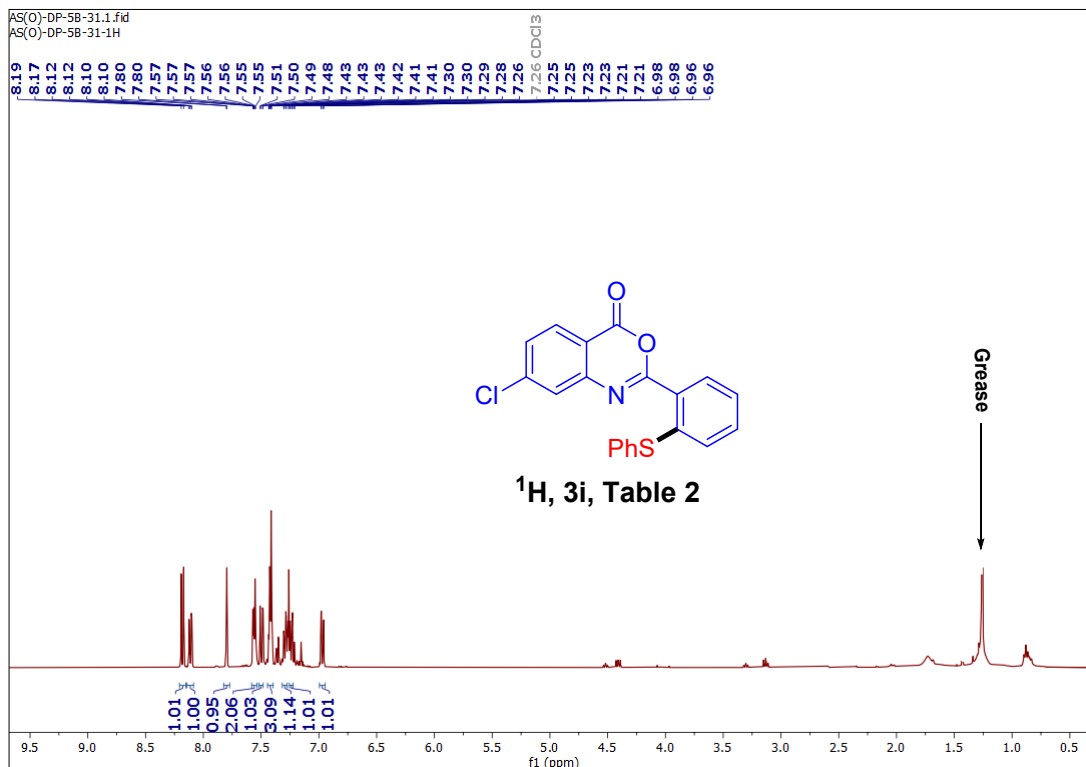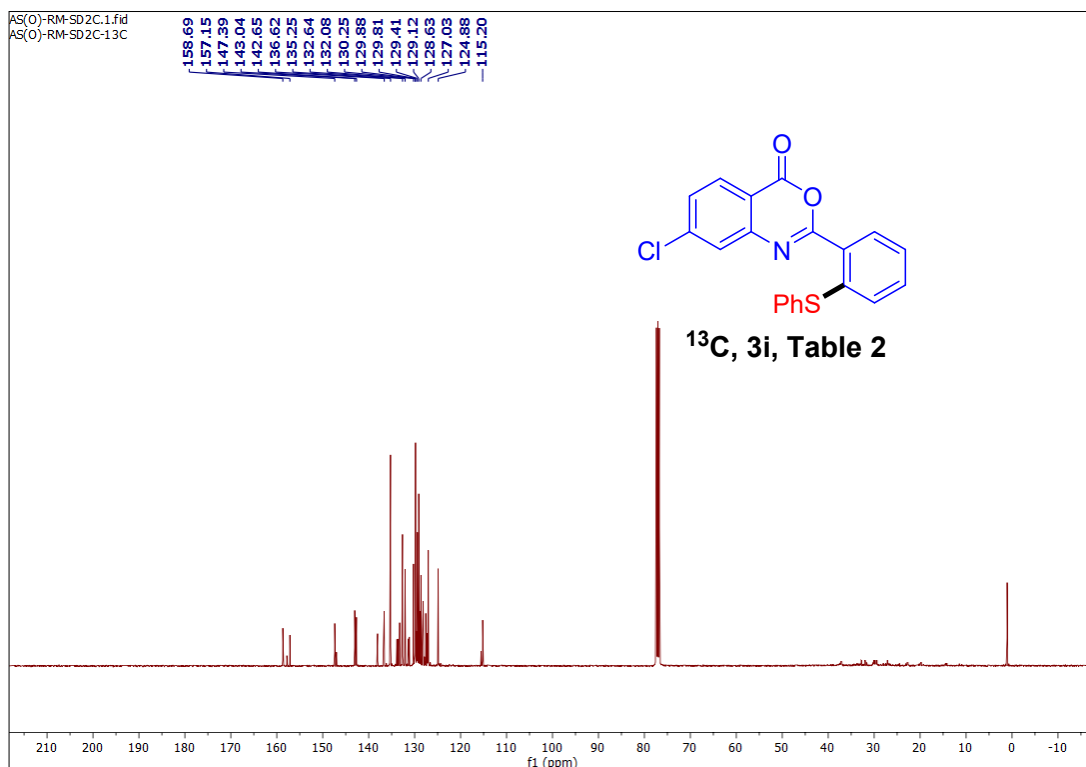



# $^1\text{H}$ NMR (400 MHz, $\text{CDCl}_3$ ) and $^{13}\text{C}$ NMR (100 MHz, $\text{CDCl}_3$ ) spectrum of 3j

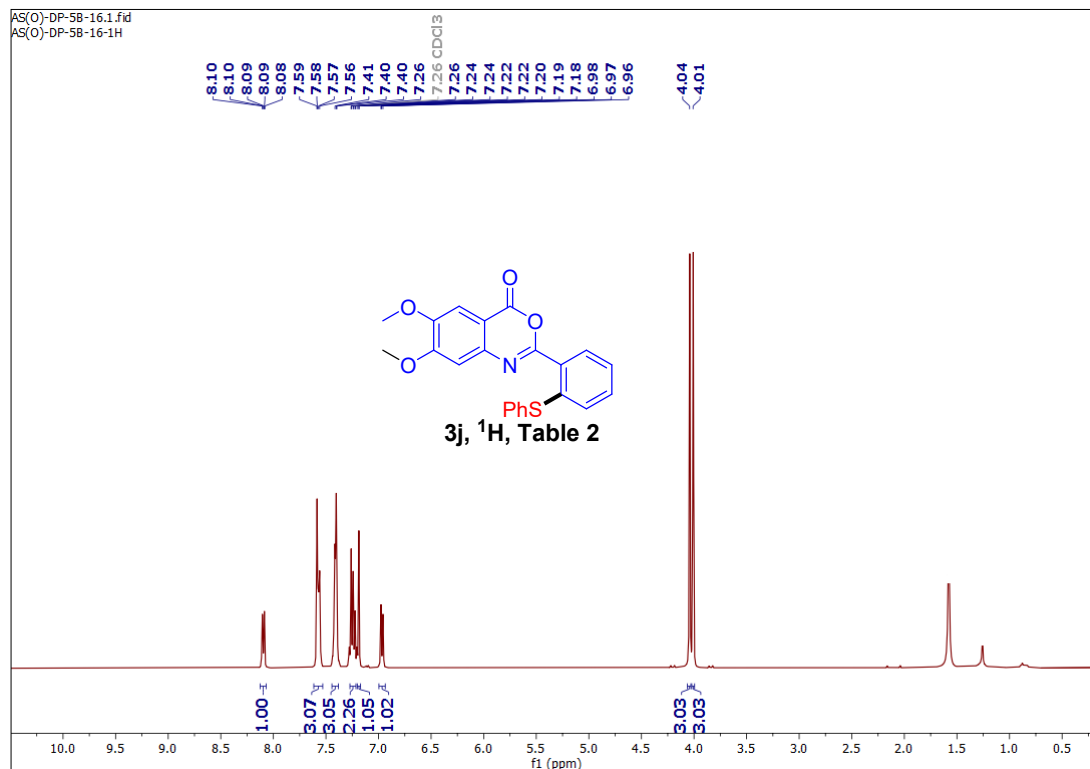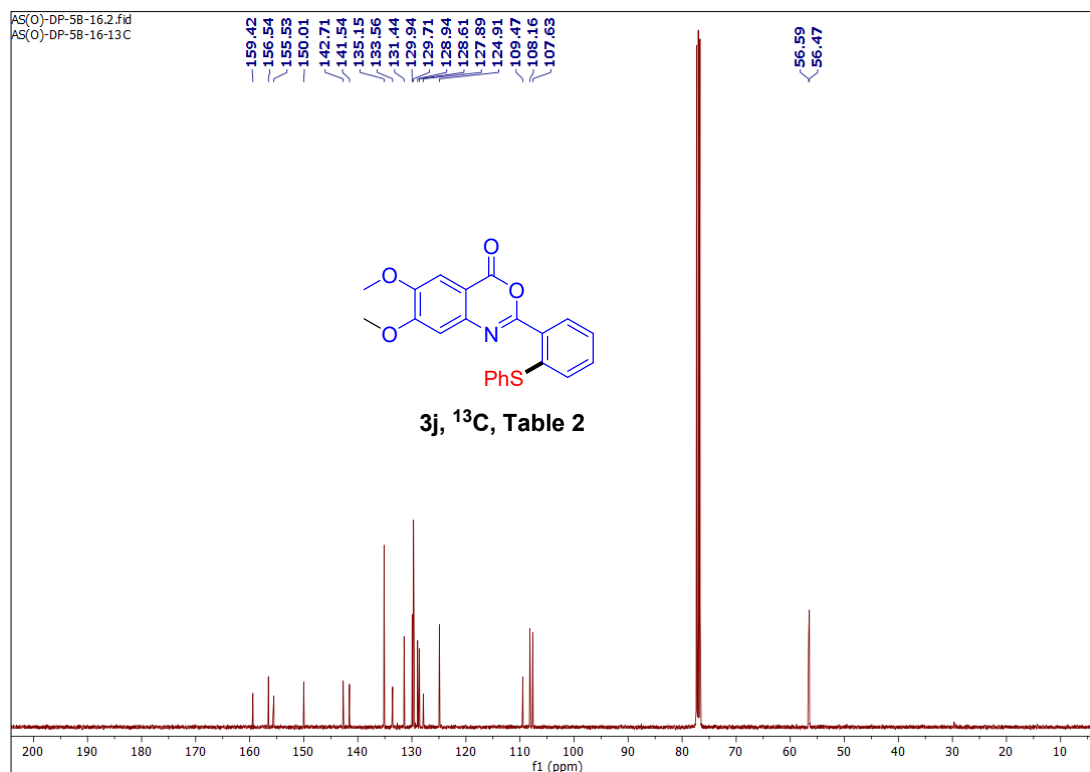

# <sup>1</sup>H NMR (300 MHz, CDCl<sub>3</sub>) and <sup>13</sup>C NMR (75 MHz, CDCl<sub>3</sub>) spectrum of 3k

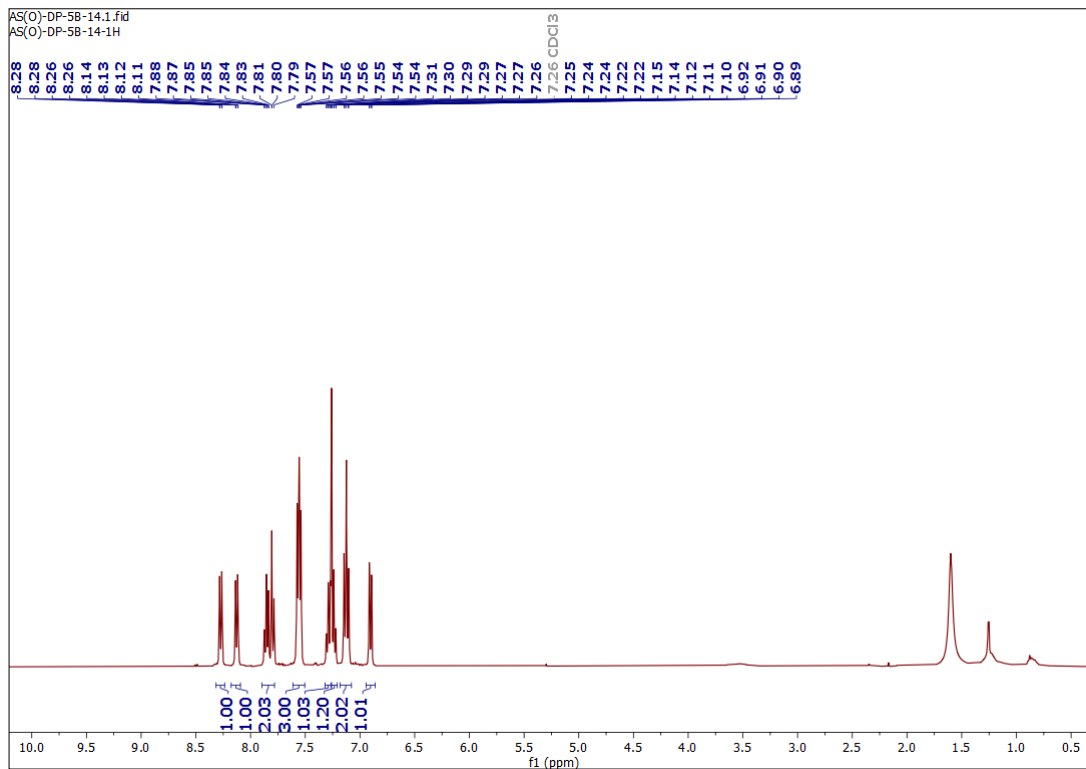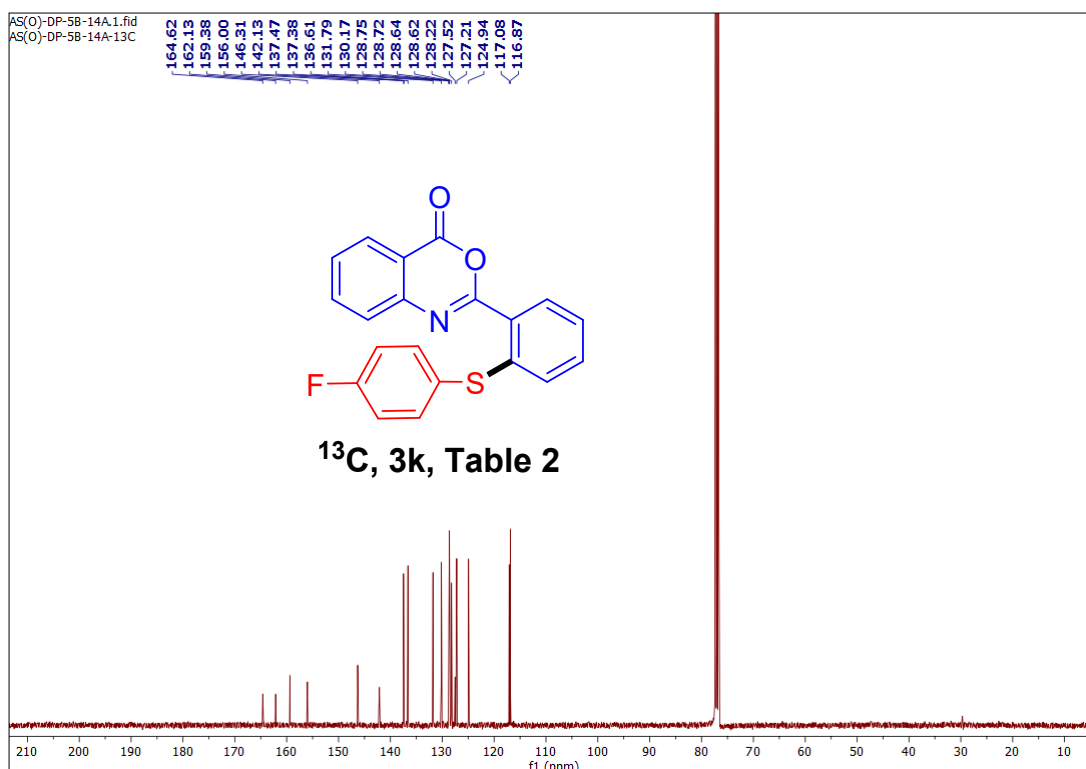

**$^{19}\text{F}$  NMR (282 MHz,  $\text{CDCl}_3$ ) spectrum of 3k**

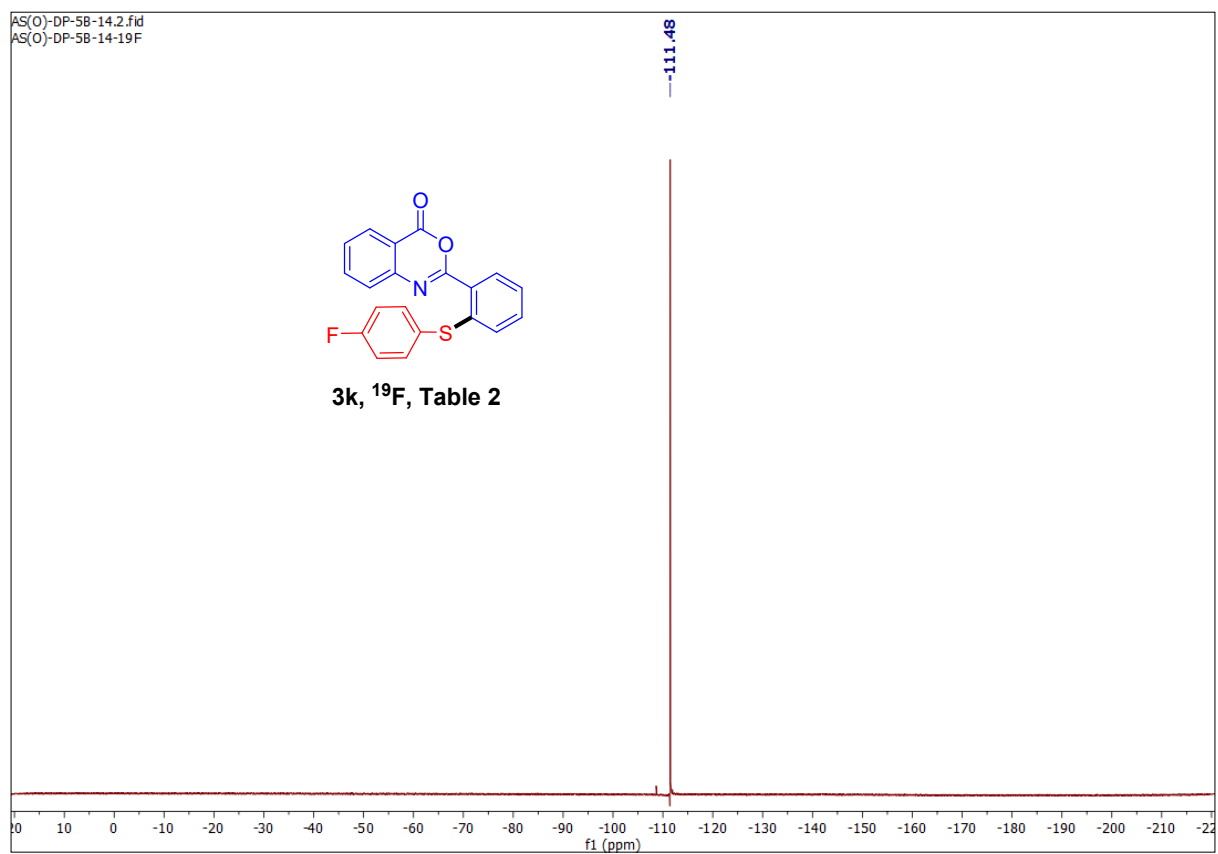

# $^1\text{H}$ NMR (400 MHz, $\text{CDCl}_3$ ) and $^{13}\text{C}$ NMR (100 MHz, $\text{CDCl}_3$ ) spectrum of 3l

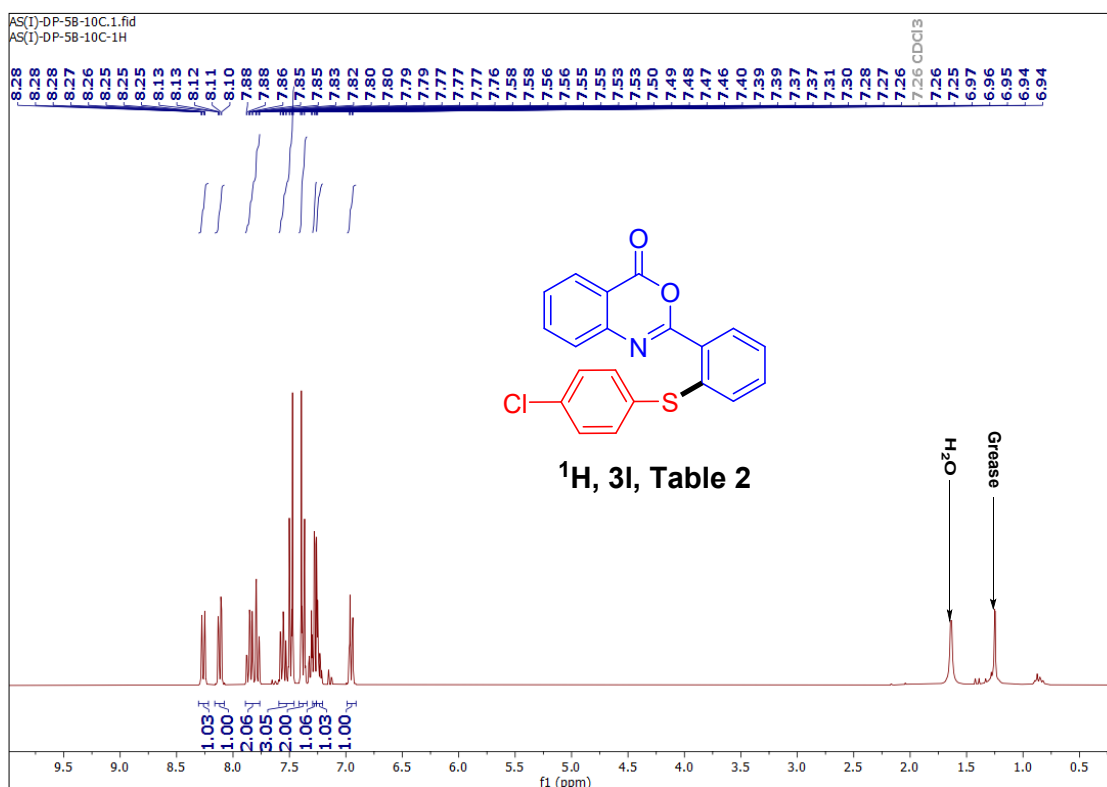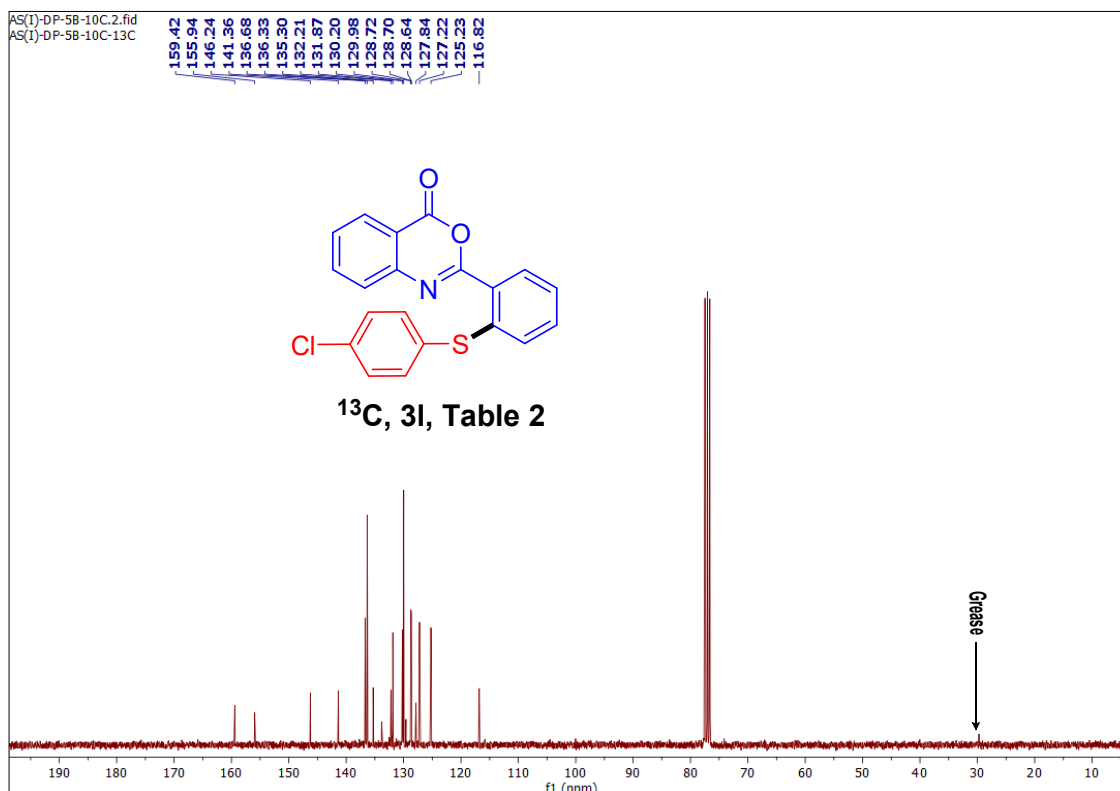

# $^1\text{H}$ NMR (400 MHz, $\text{CDCl}_3$ ) and $^{13}\text{C}$ NMR (100 MHz, $\text{CDCl}_3$ ) spectrum of 3m

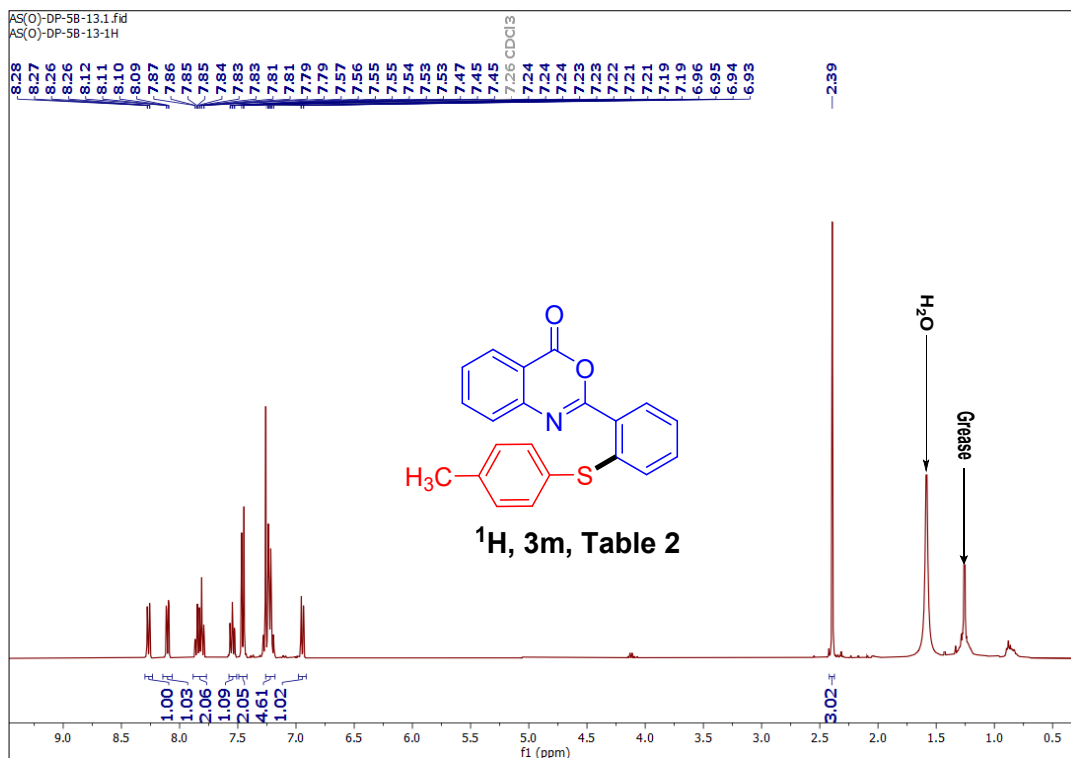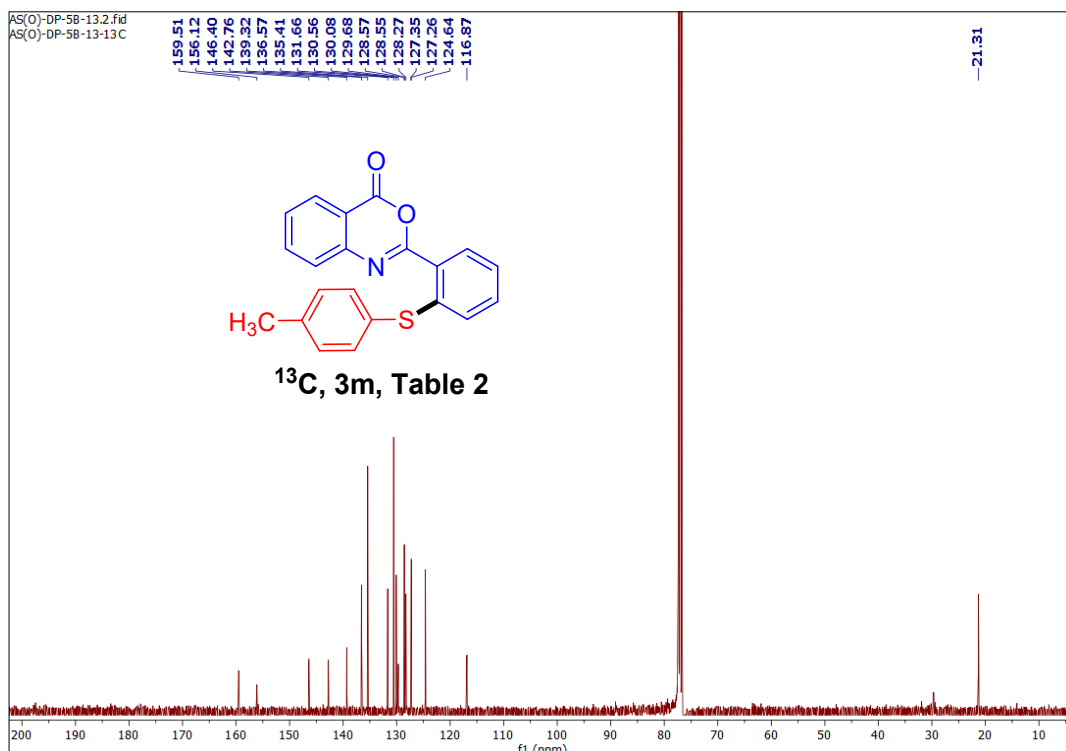

# $^1\text{H}$ NMR (400 MHz, $\text{CDCl}_3$ ) and $^{13}\text{C}$ NMR (100 MHz, $\text{CDCl}_3$ ) spectrum of **3n**

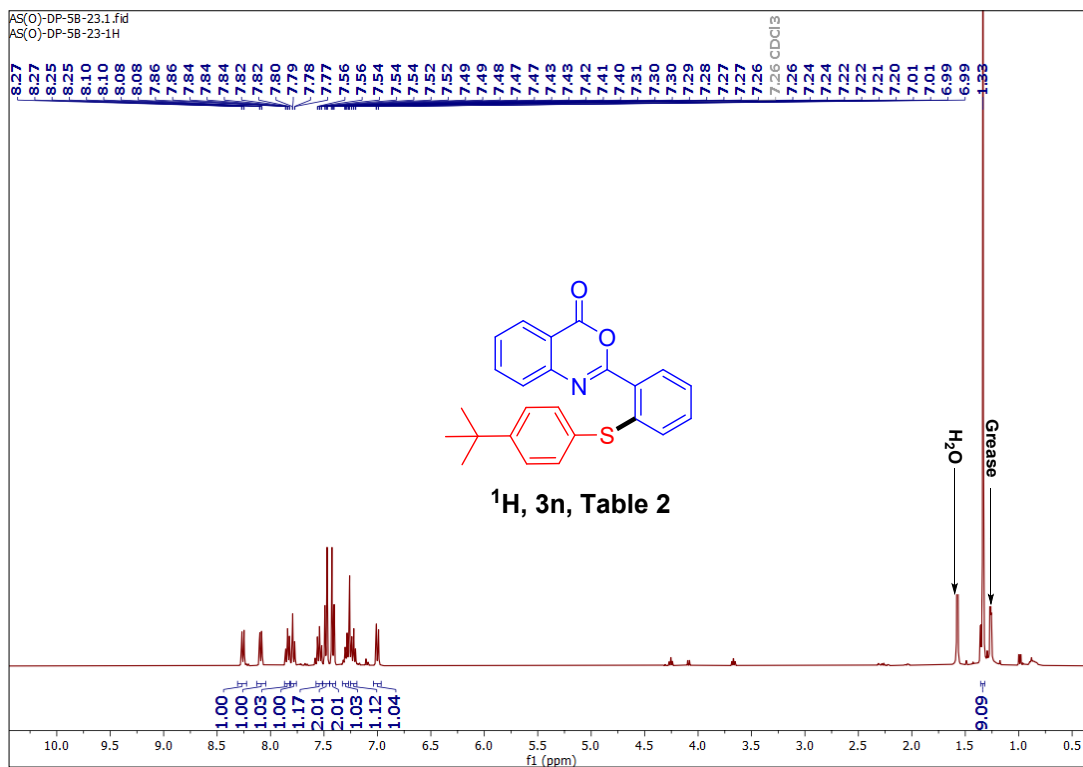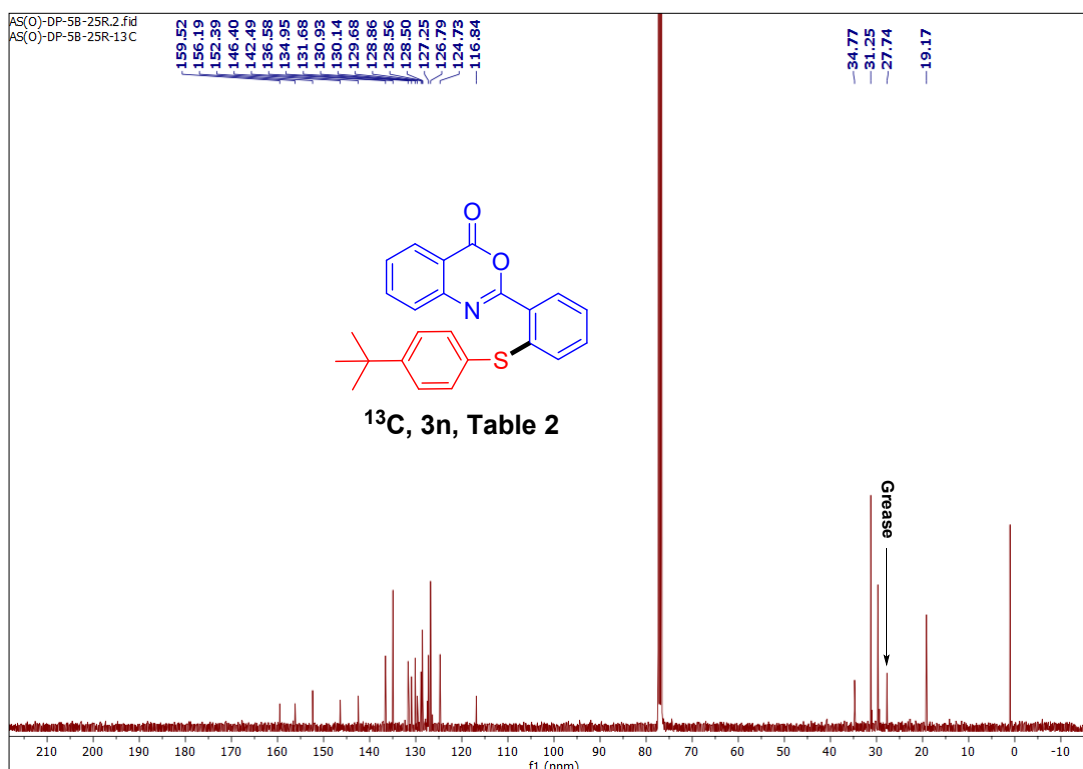

# $^1\text{H}$ NMR (300 MHz, $\text{CDCl}_3$ ) and $^{13}\text{C}$ NMR (75 MHz, $\text{CDCl}_3$ ) spectrum of 3o

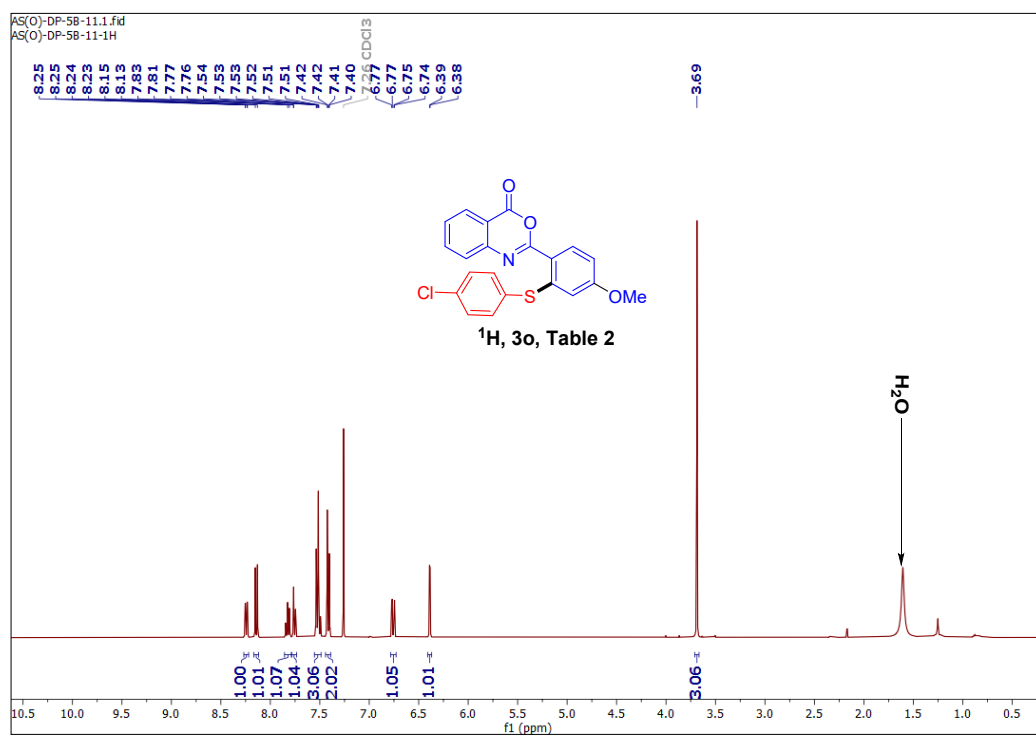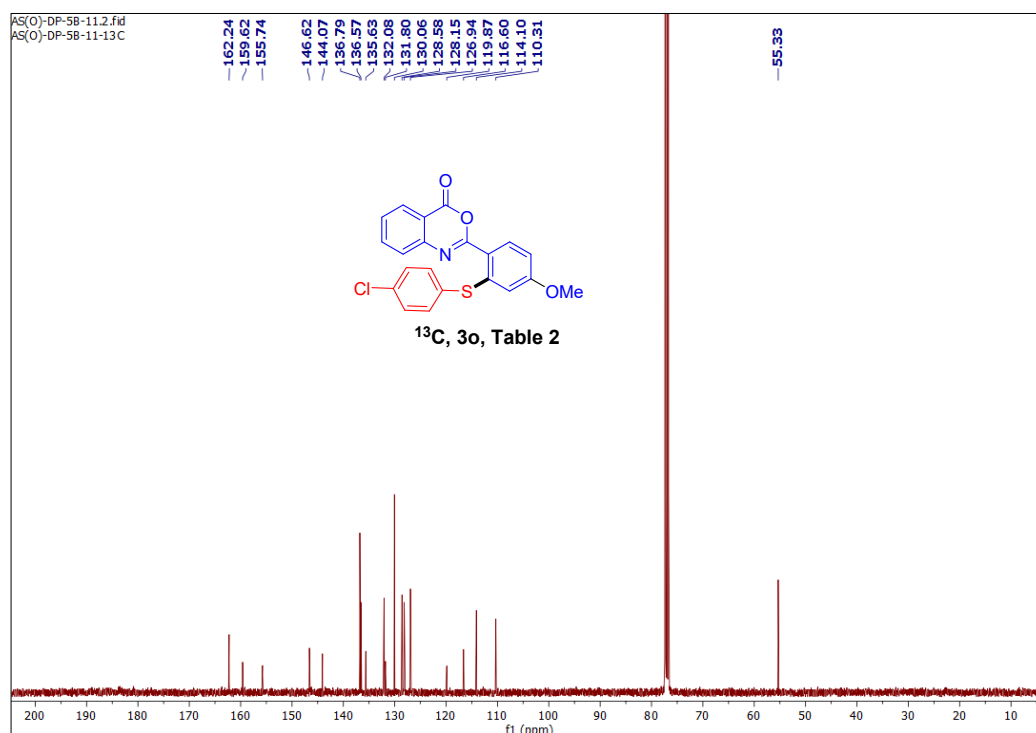

# $^1\text{H}$ NMR (400 MHz, $\text{CDCl}_3$ ) and $^{13}\text{C}$ NMR (100 MHz, $\text{CDCl}_3$ ) spectrum of 3p

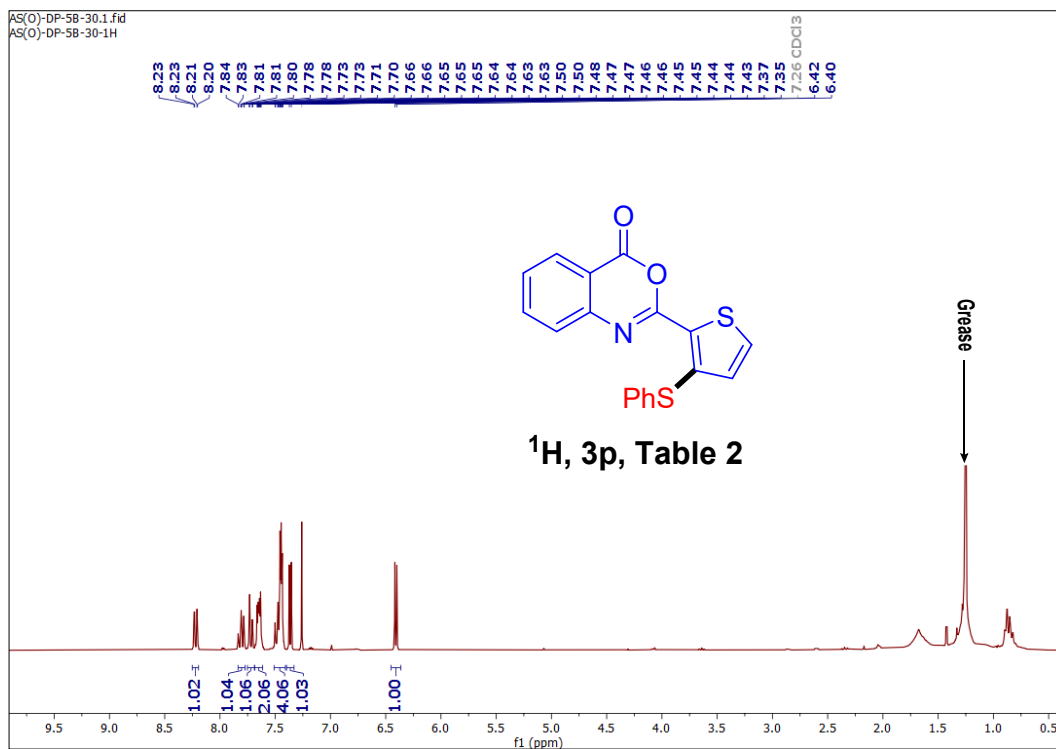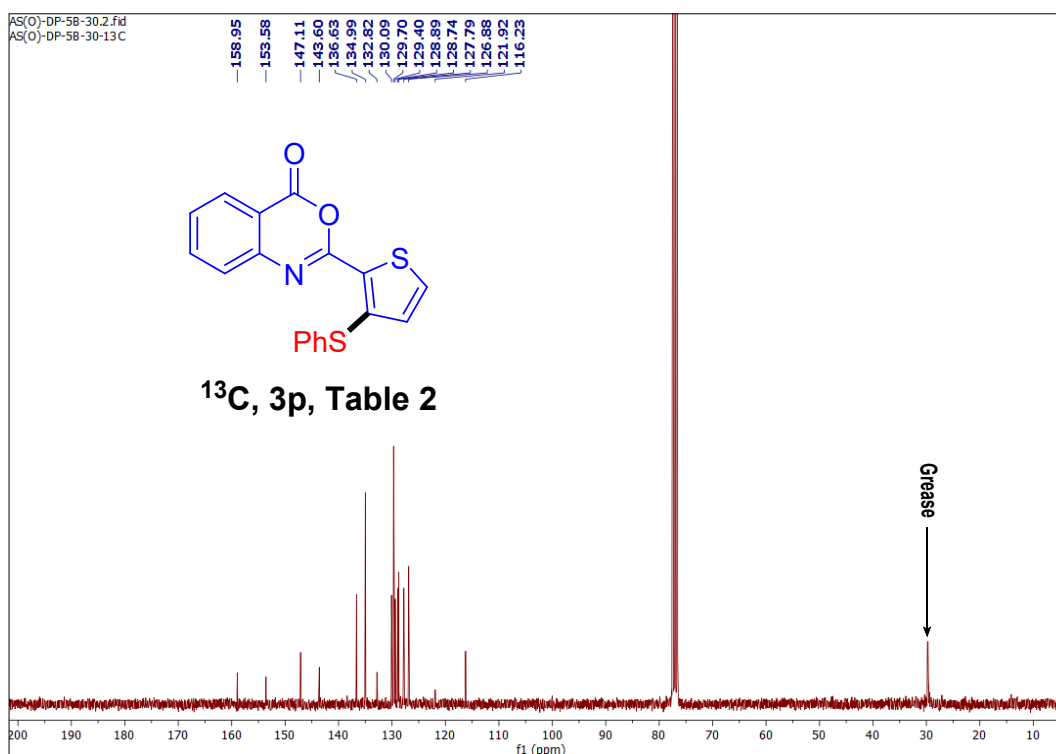



**<sup>1</sup>H NMR (400 MHz, CDCl<sub>3</sub>) and <sup>13</sup>C NMR (100 MHz, CDCl<sub>3</sub>) spectrum of 3q**

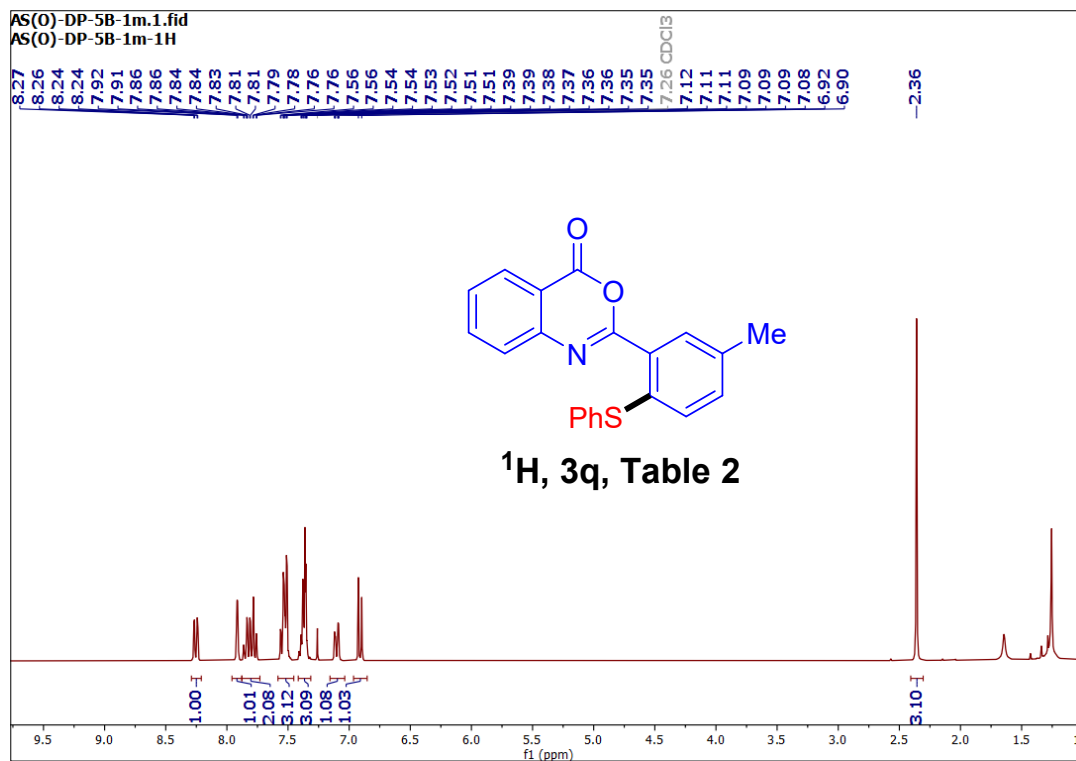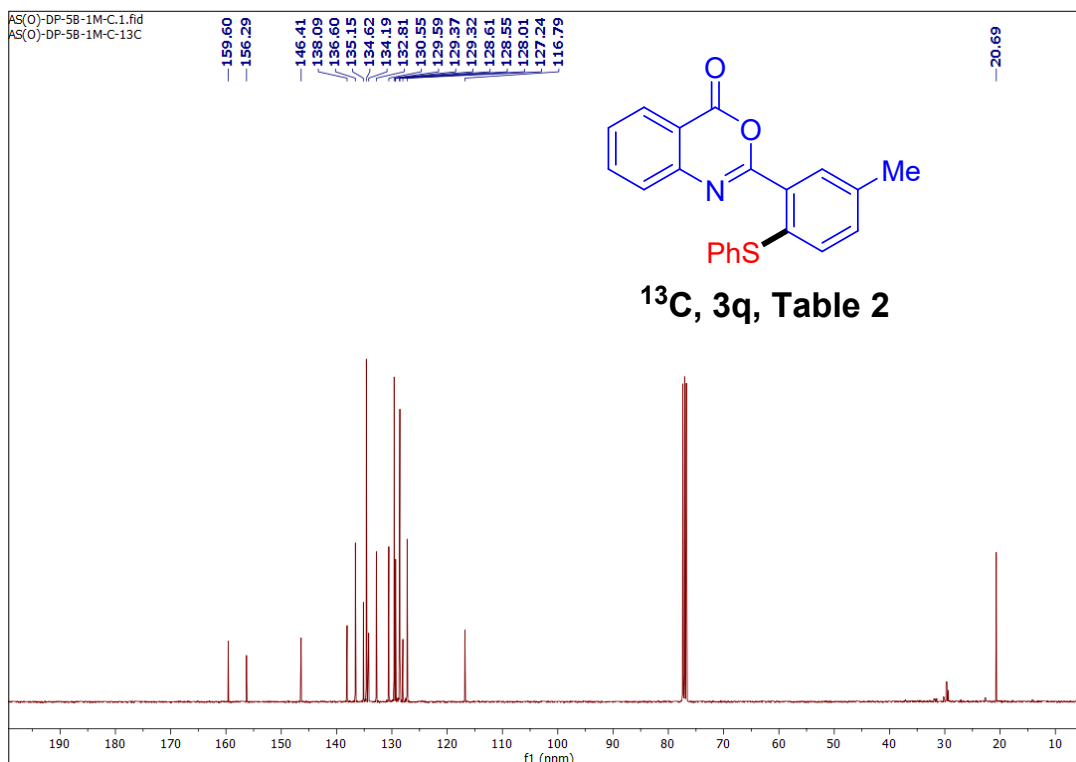

**$^1\text{H}$  NMR (400 MHz,  $\text{CDCl}_3$ ) and  $^{13}\text{C}$  NMR (100 MHz,  $\text{CDCl}_3$ ) spectrum of 3r**

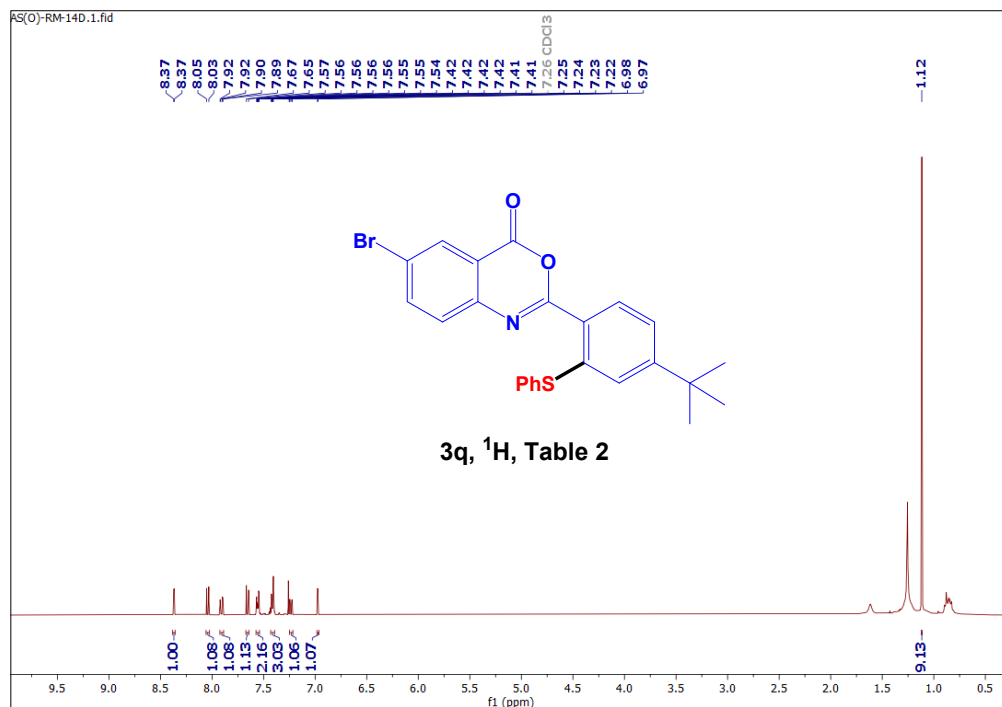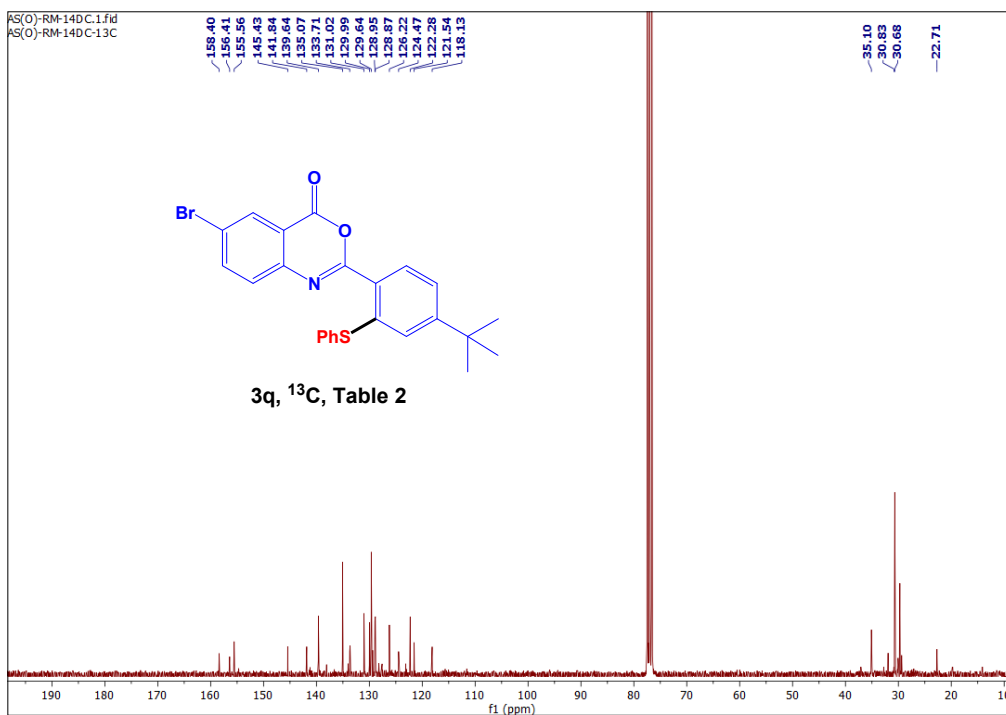

# $^1\text{H}$ NMR (400 MHz, $\text{CDCl}_3$ ) and $^{13}\text{C}$ NMR (100 MHz, $\text{CDCl}_3$ ) spectrum of **4a**

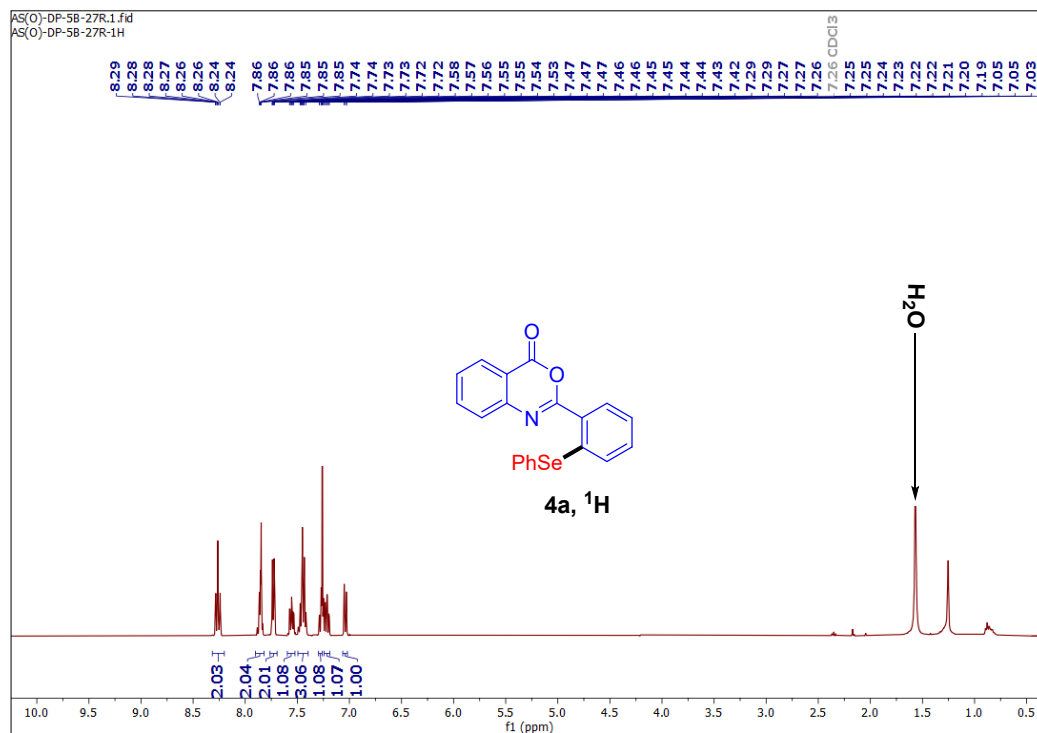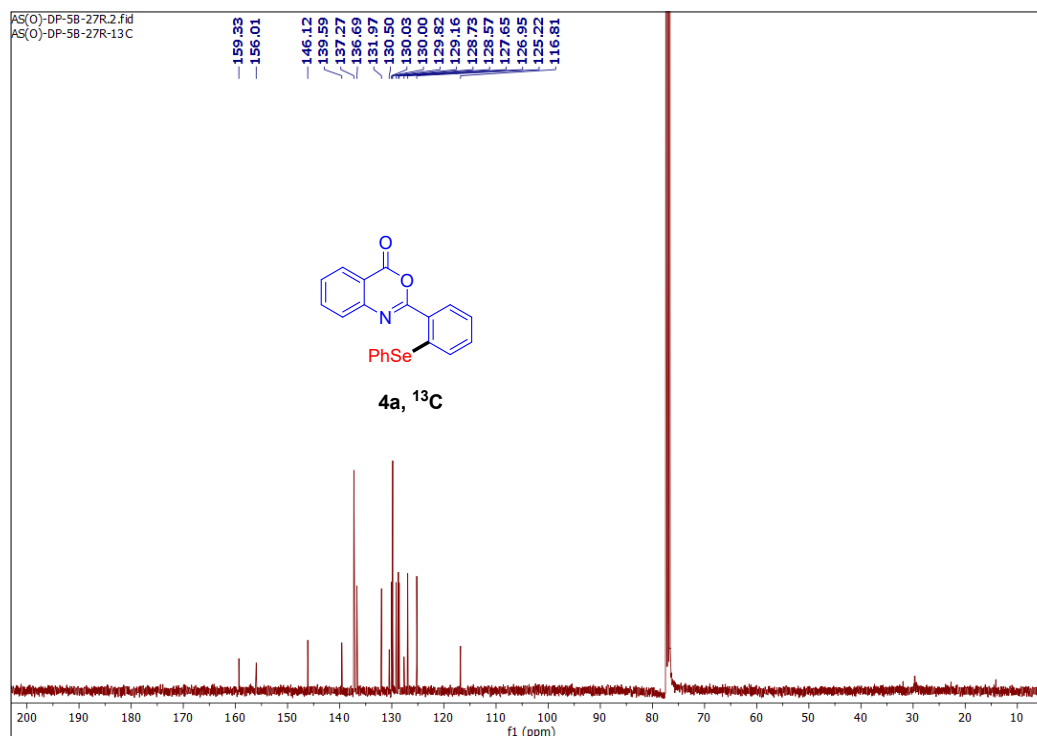

# $^1\text{H}$ NMR (400 MHz, $\text{CDCl}_3$ ) and $^{13}\text{C}$ NMR (100 MHz, $\text{CDCl}_3$ ) spectrum of 4b

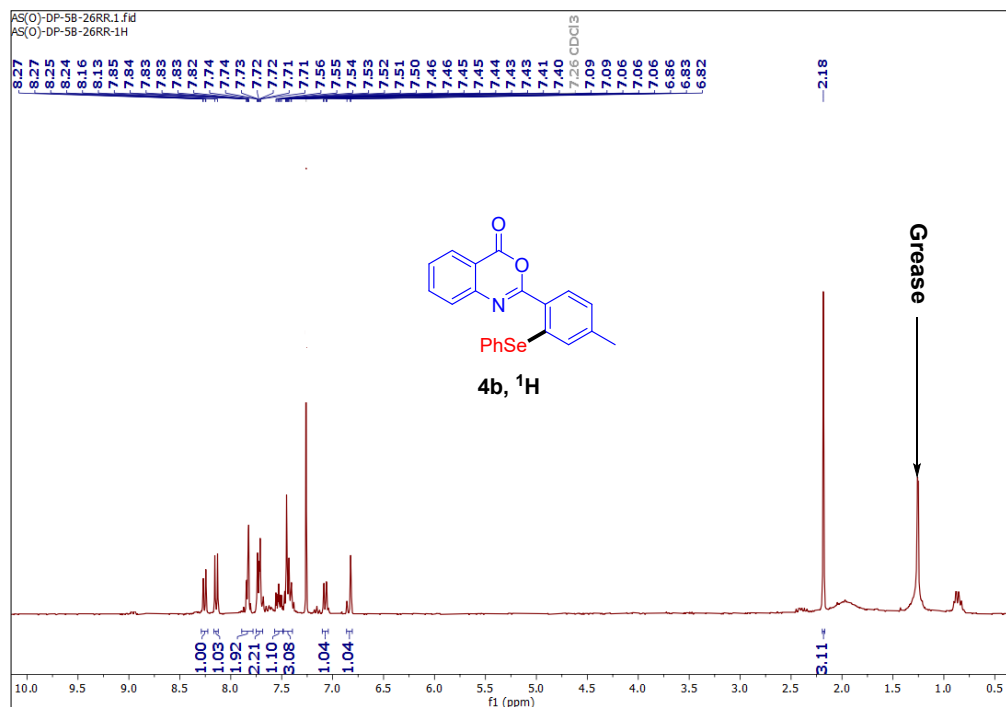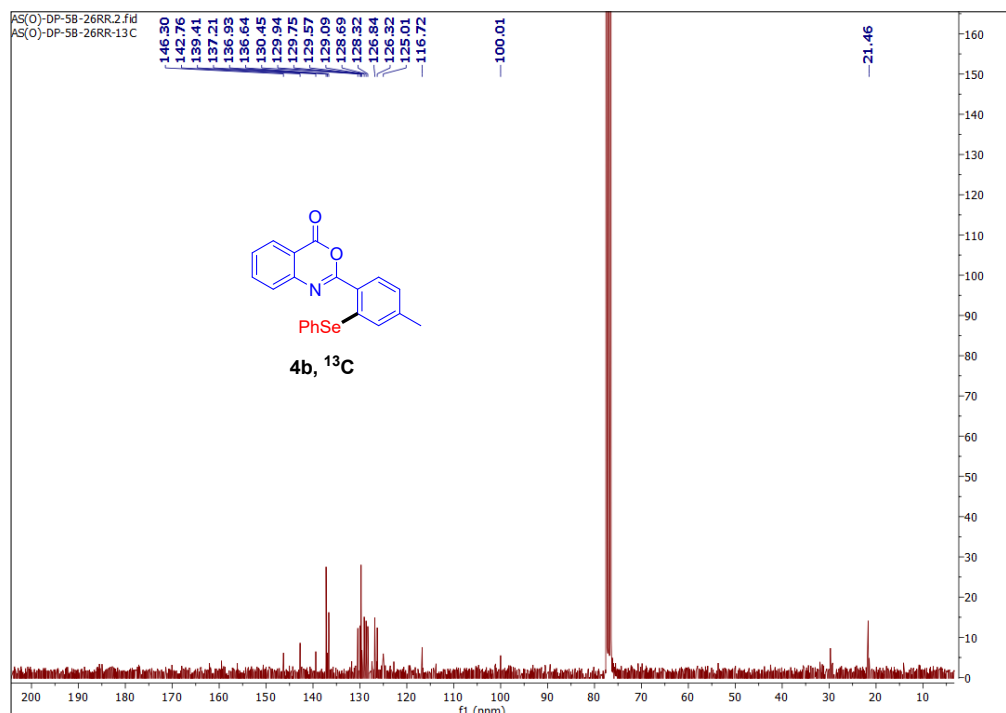

**$^1\text{H}$  NMR (400 MHz,  $\text{CDCl}_3$ ) and  $^{13}\text{C}$  NMR (100 MHz,  $\text{CDCl}_3$ ) spectrum of 5a**

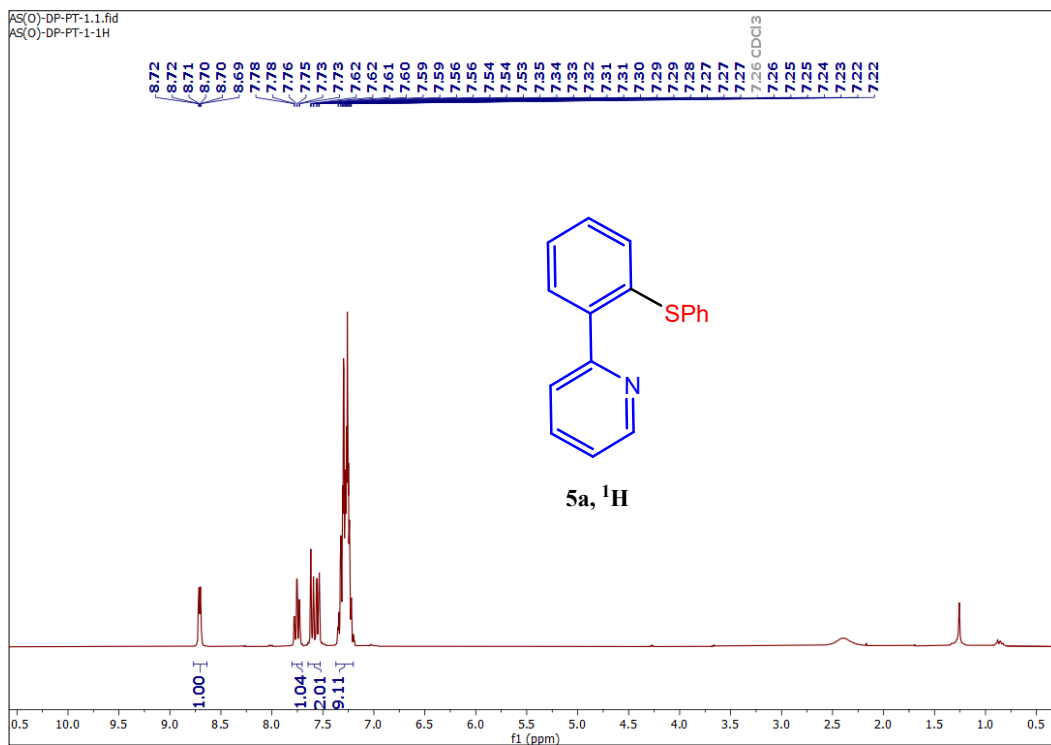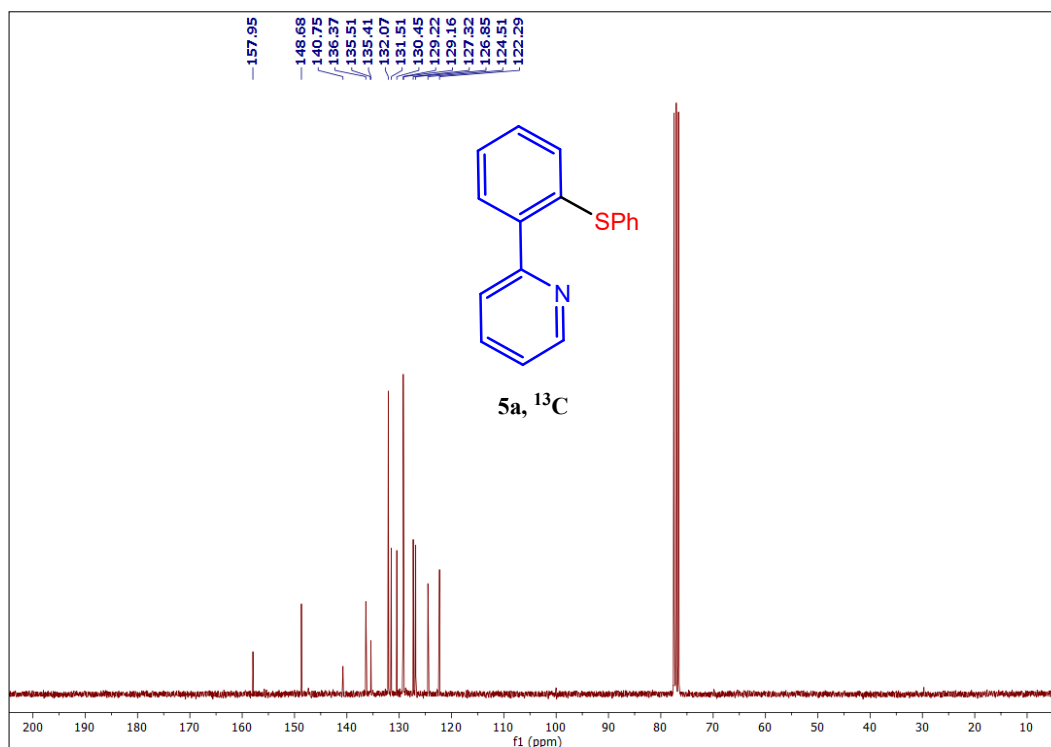

**$^1\text{H}$  NMR (400 MHz,  $\text{CDCl}_3$ ) and  $^{13}\text{C}$  NMR (100 MHz,  $\text{CDCl}_3$ ) spectrum of 5b**

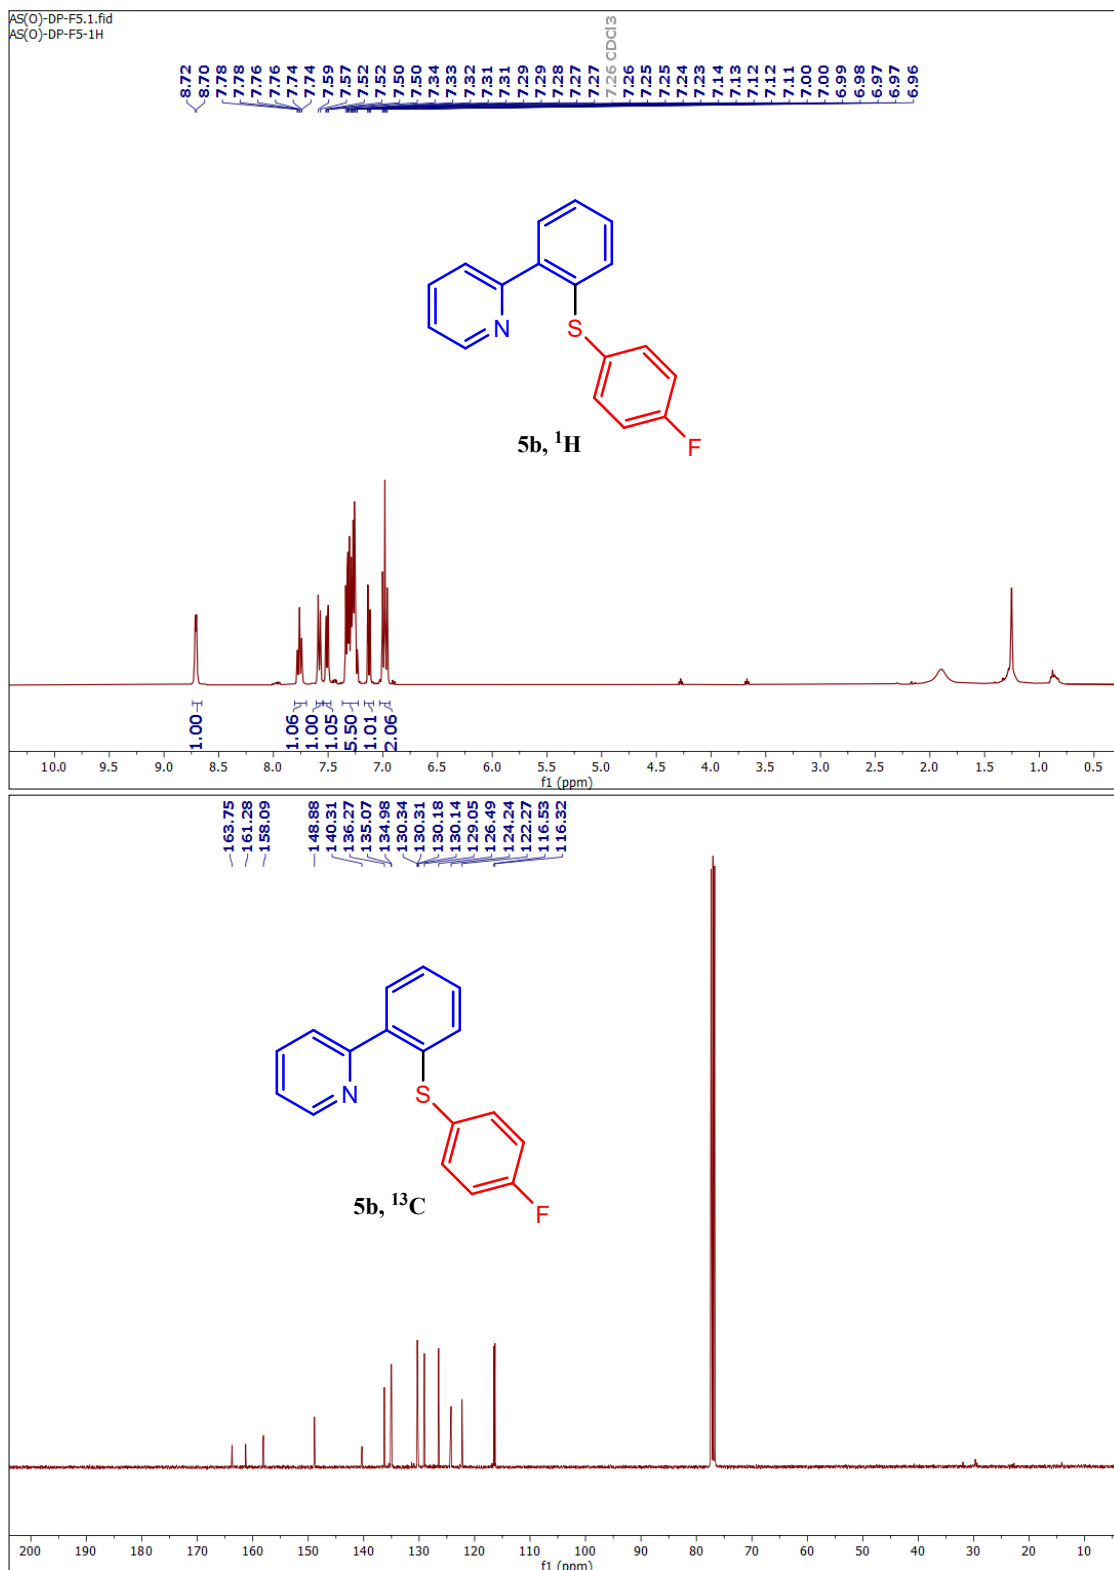

**$^{19}\text{F}$  NMR (376 MHz,  $\text{CDCl}_3$ ) spectrum of 5b**

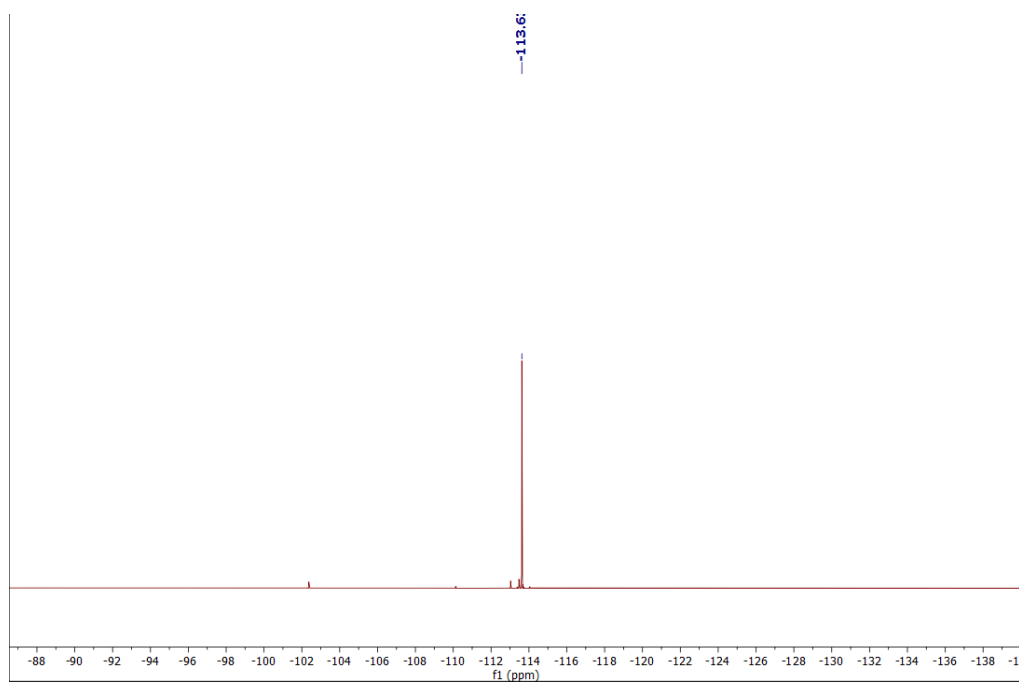

**$^1\text{H}$  NMR (400 MHz,  $\text{CDCl}_3$ ) and  $^{13}\text{C}$  NMR (100 MHz,  $\text{CDCl}_3$ ) spectrum of 5c**

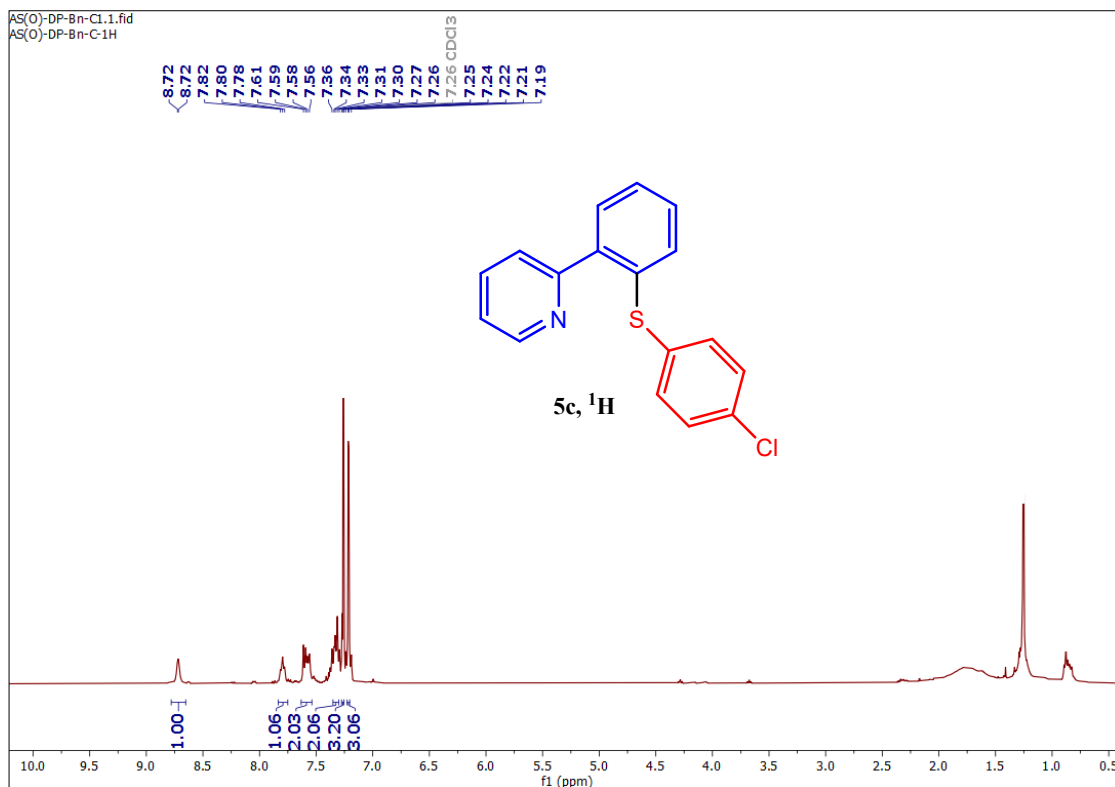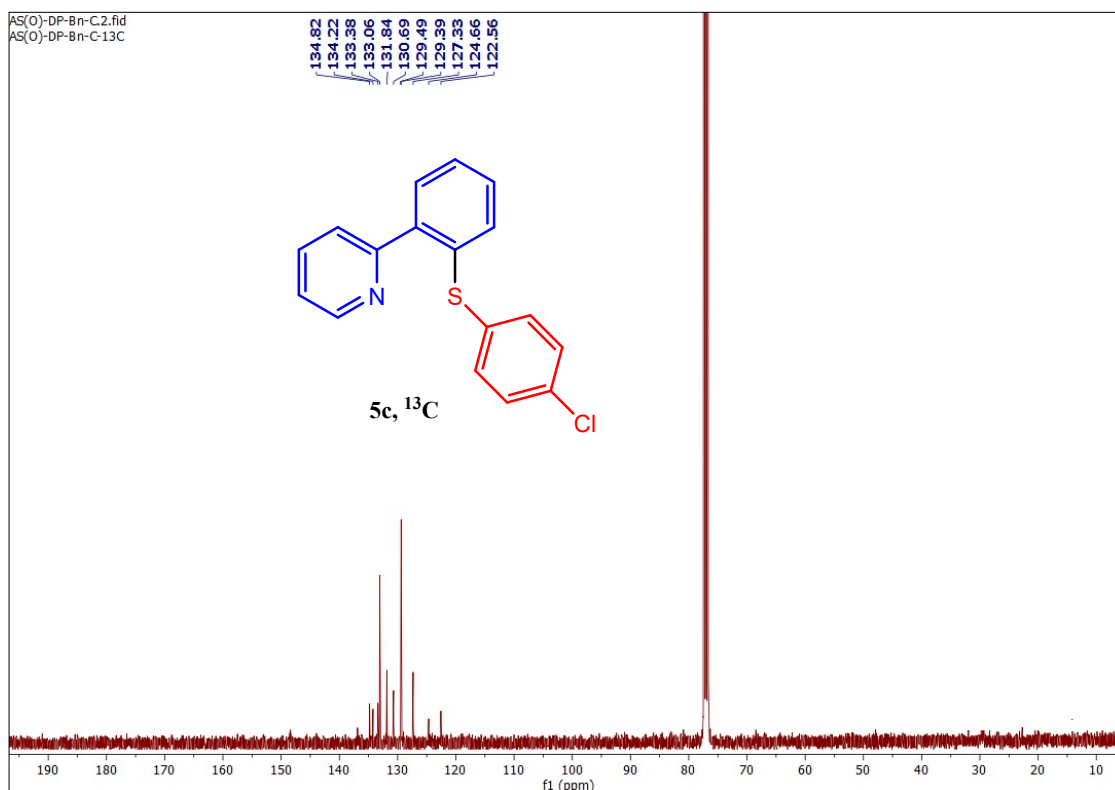



## 7. Mass spectra of all products:

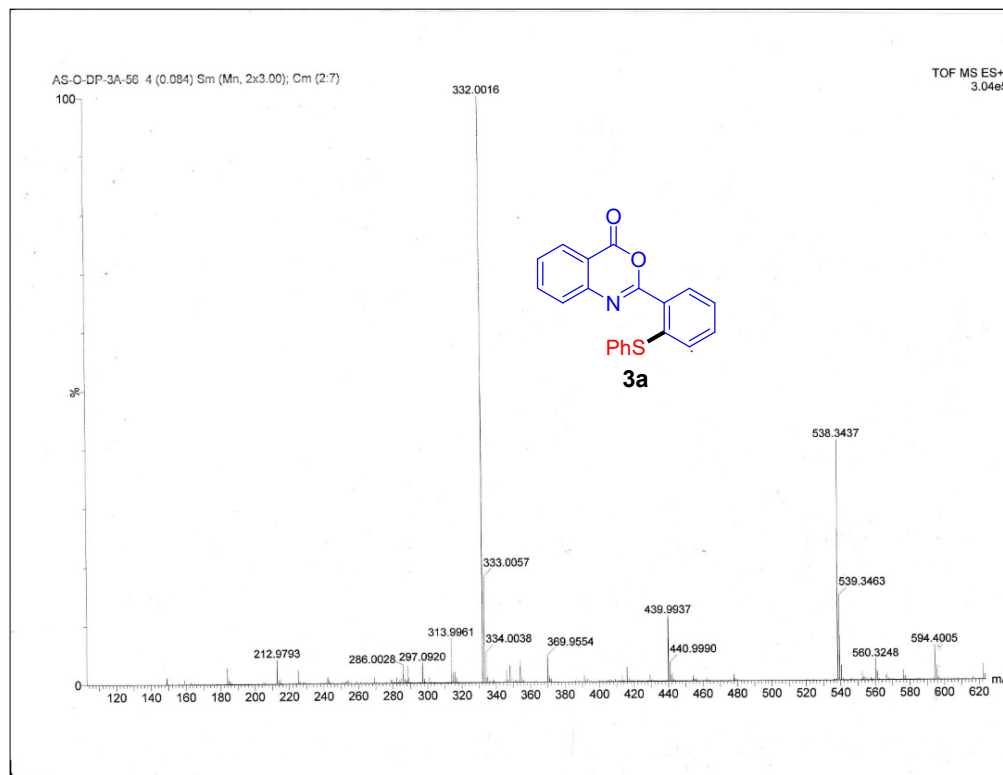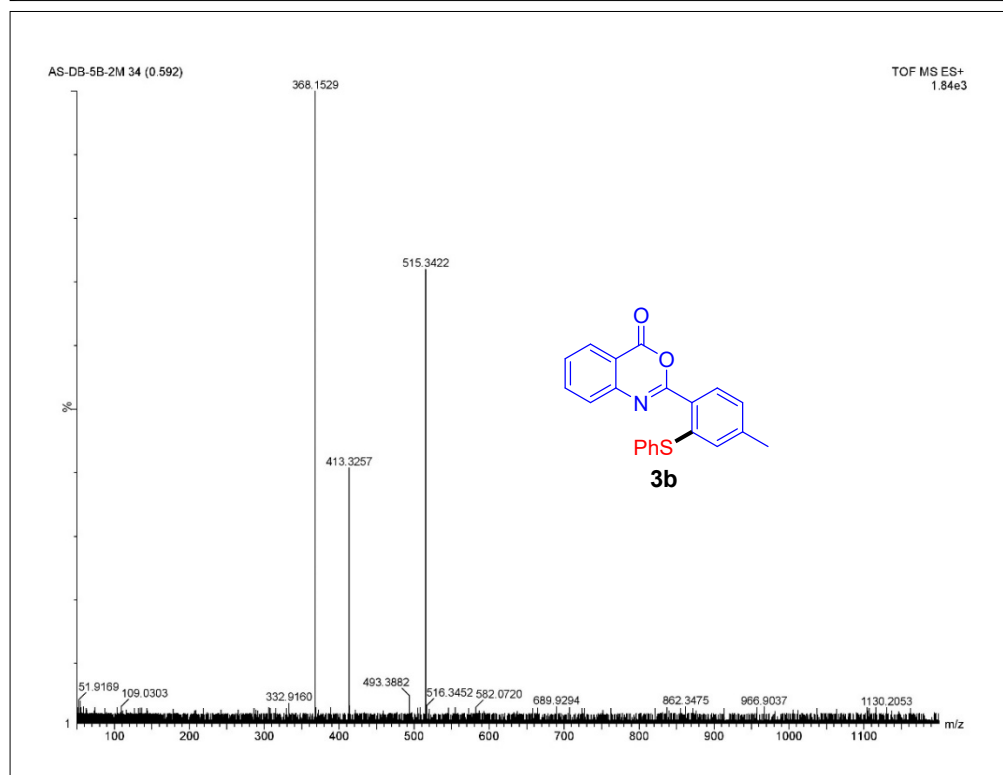



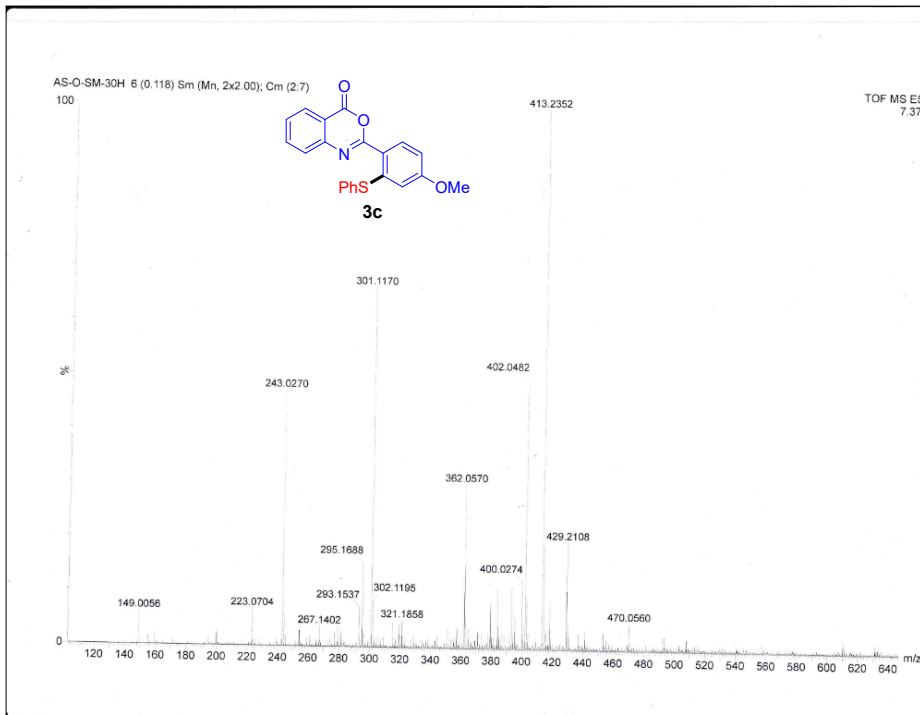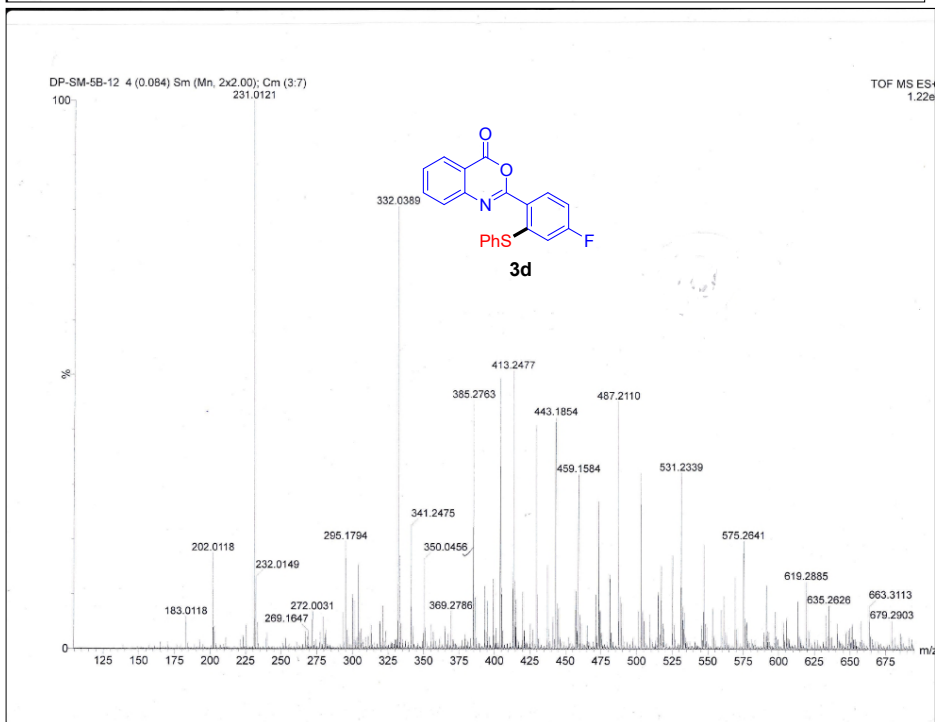

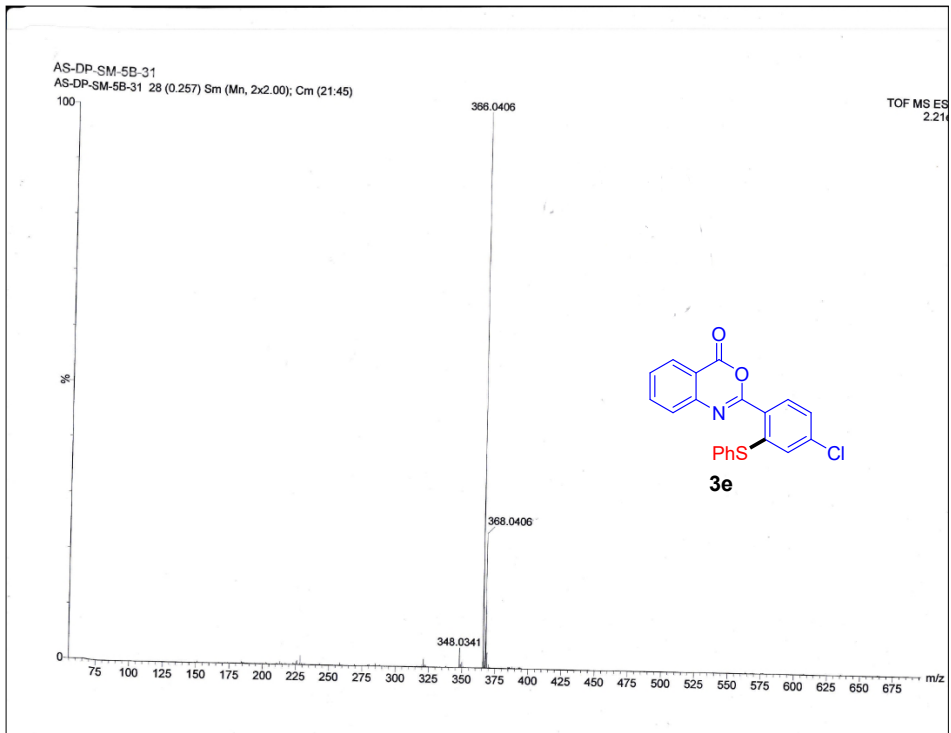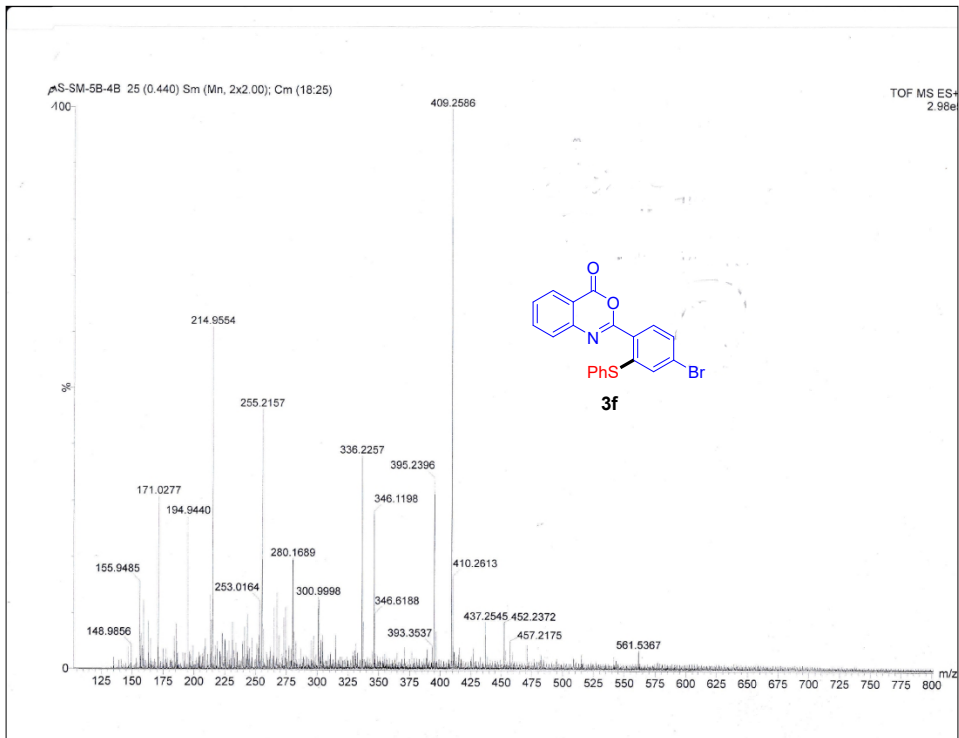

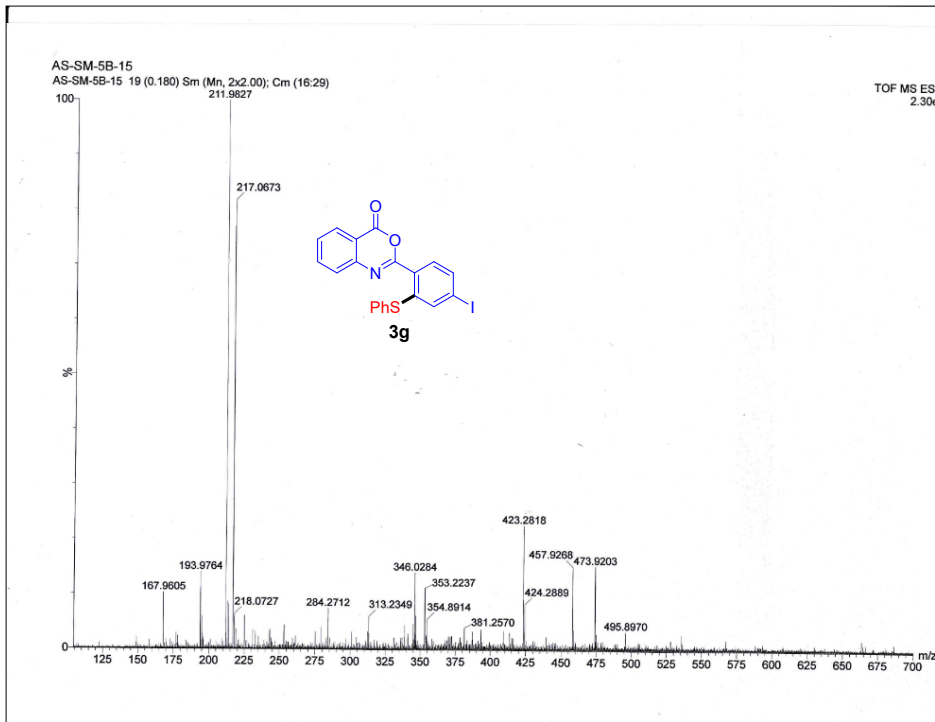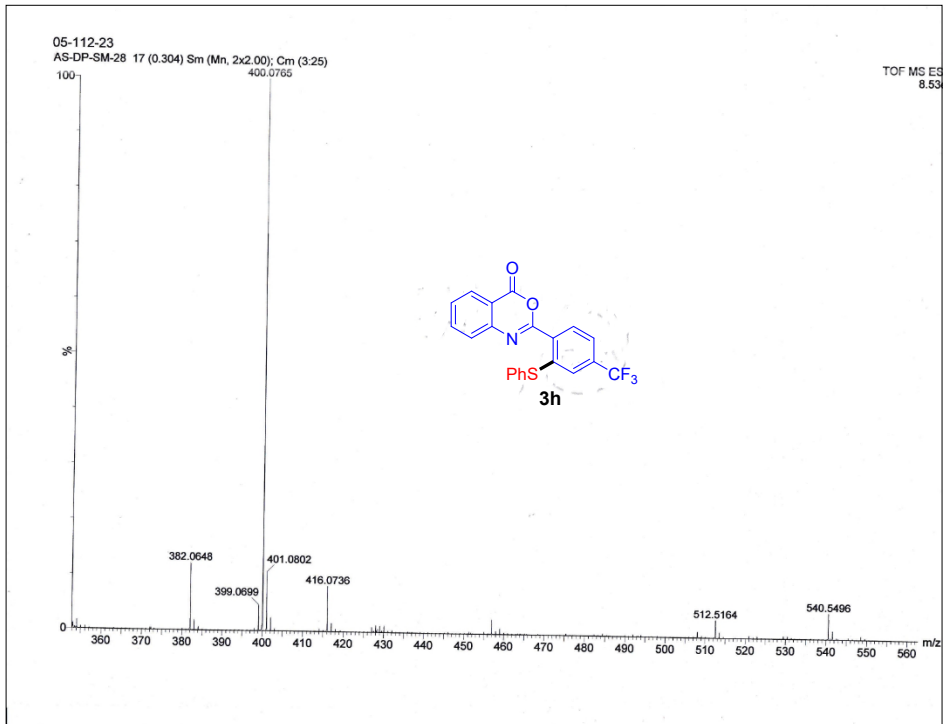

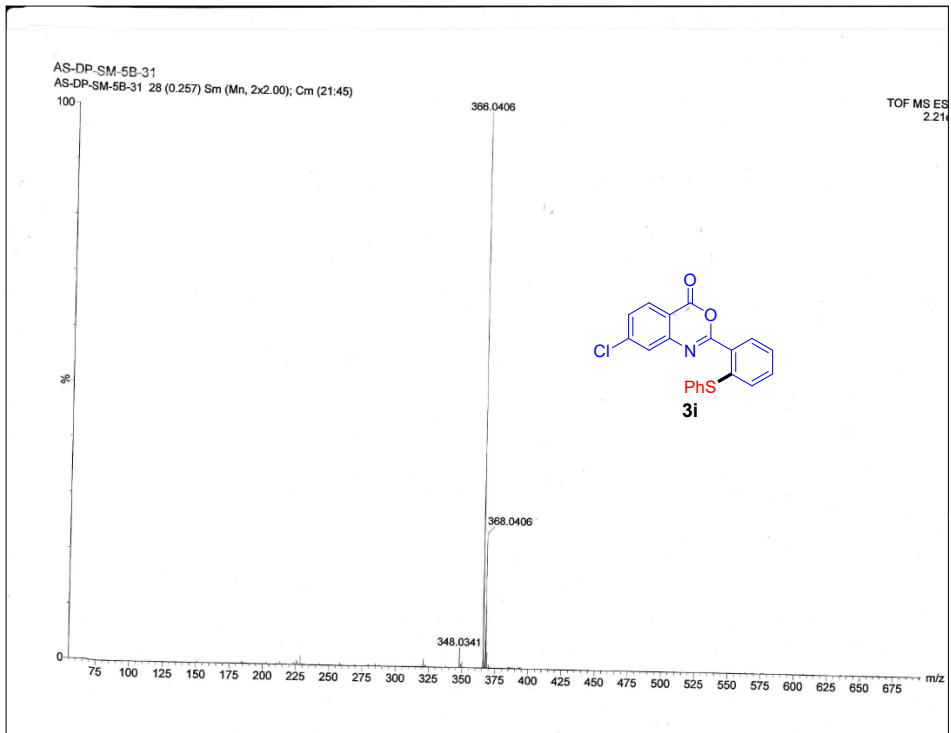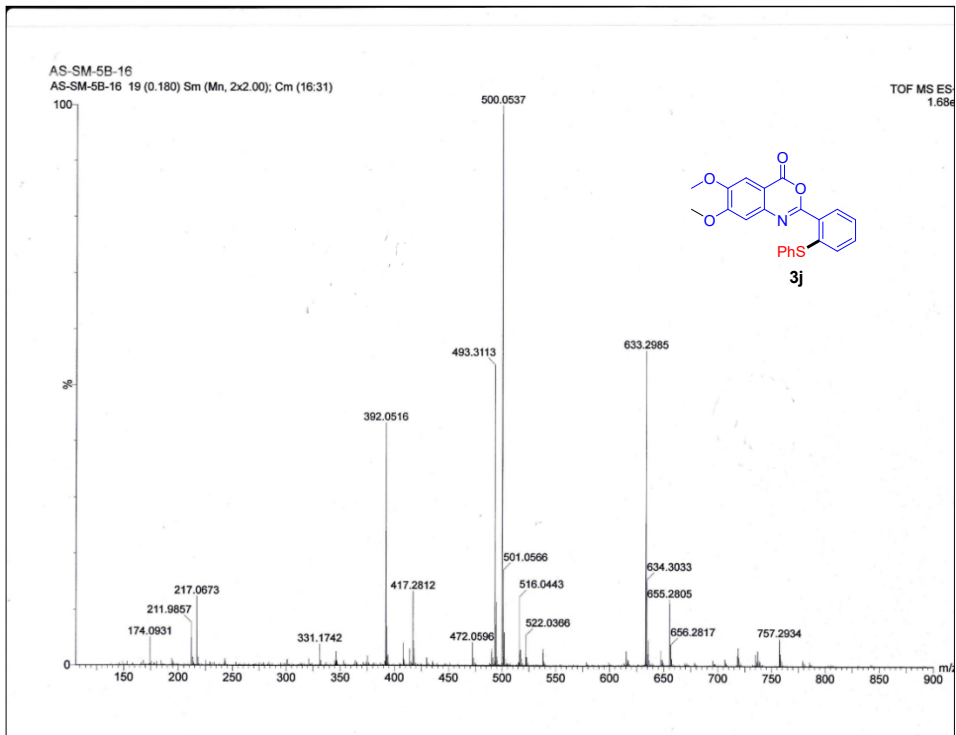

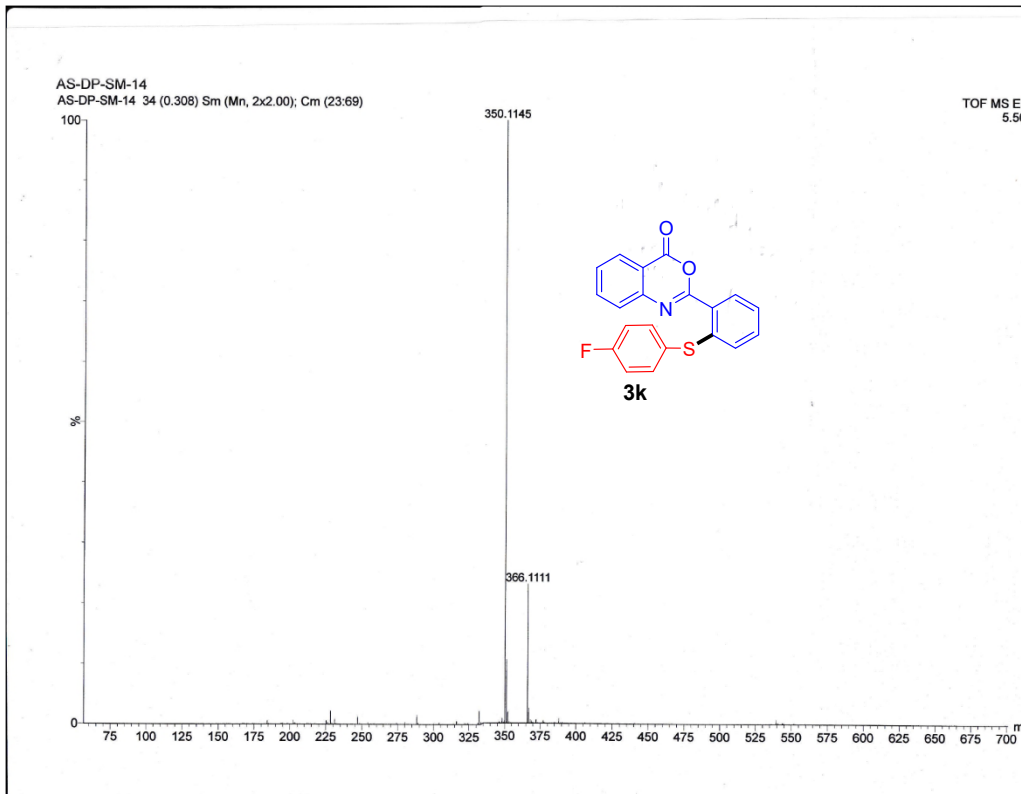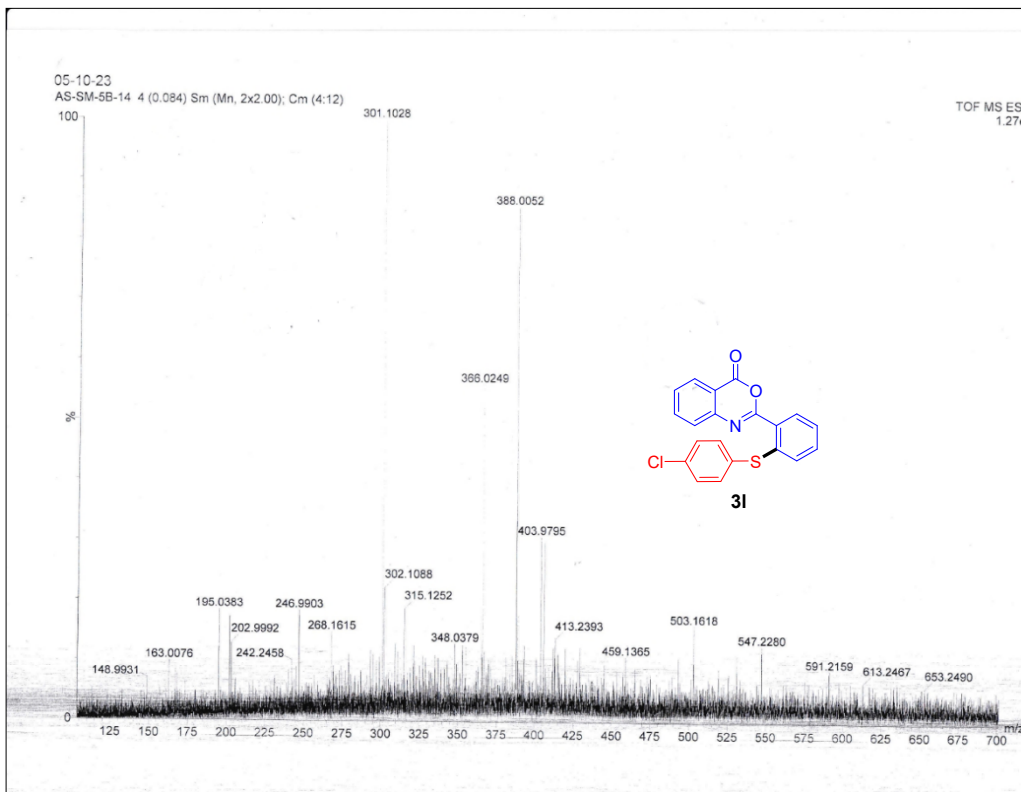

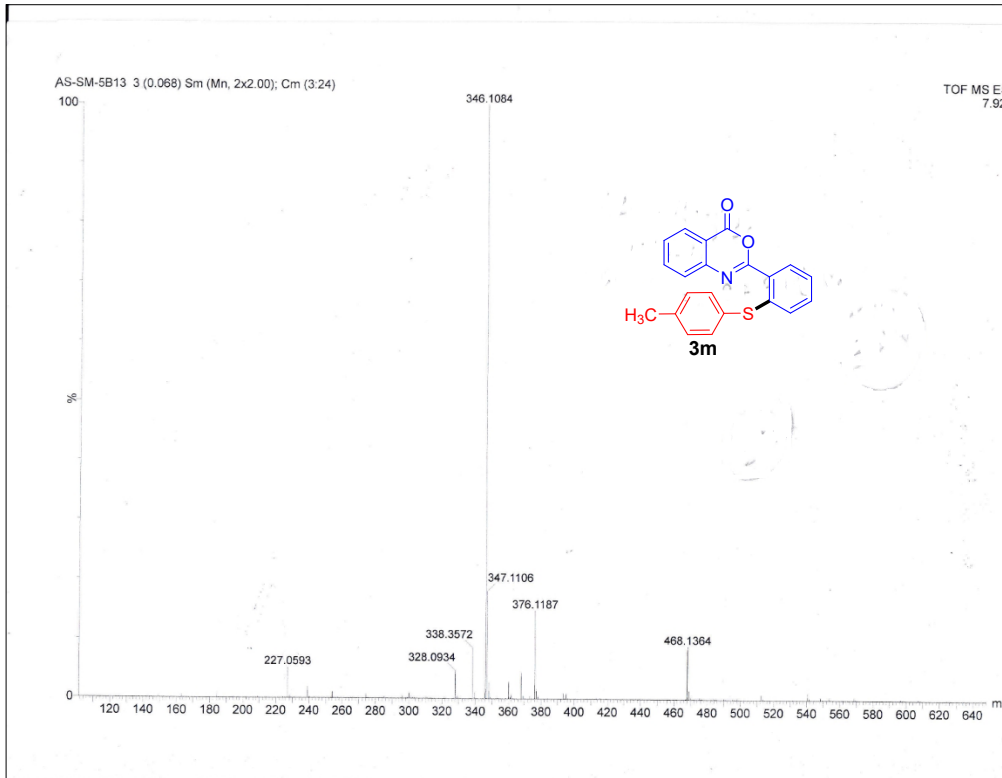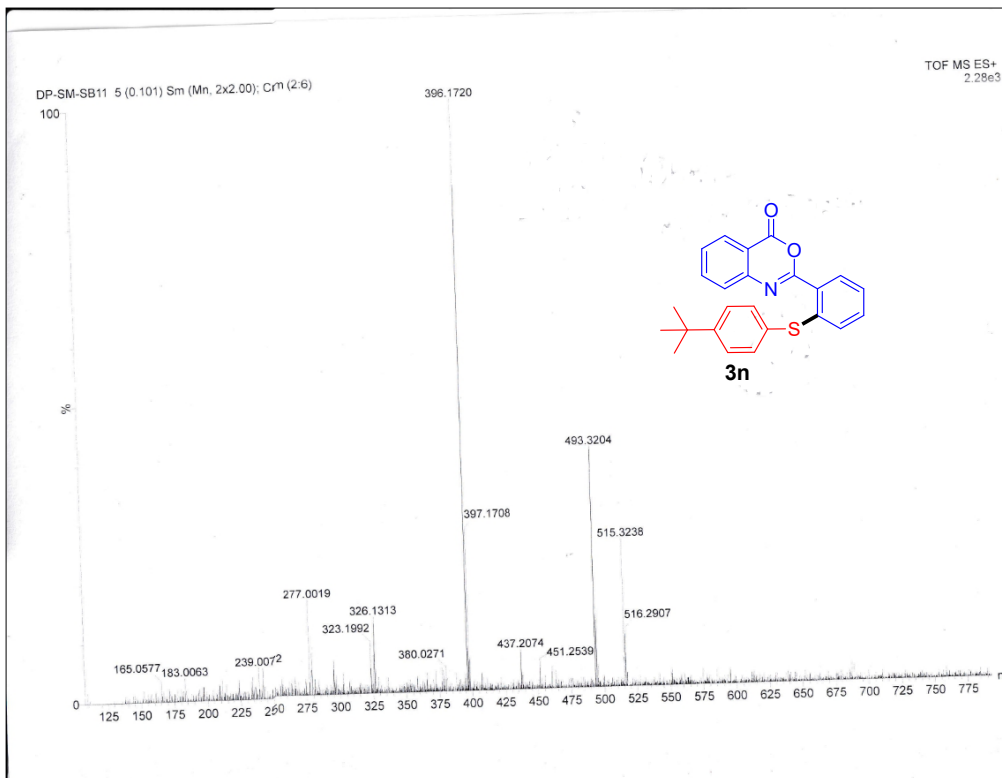



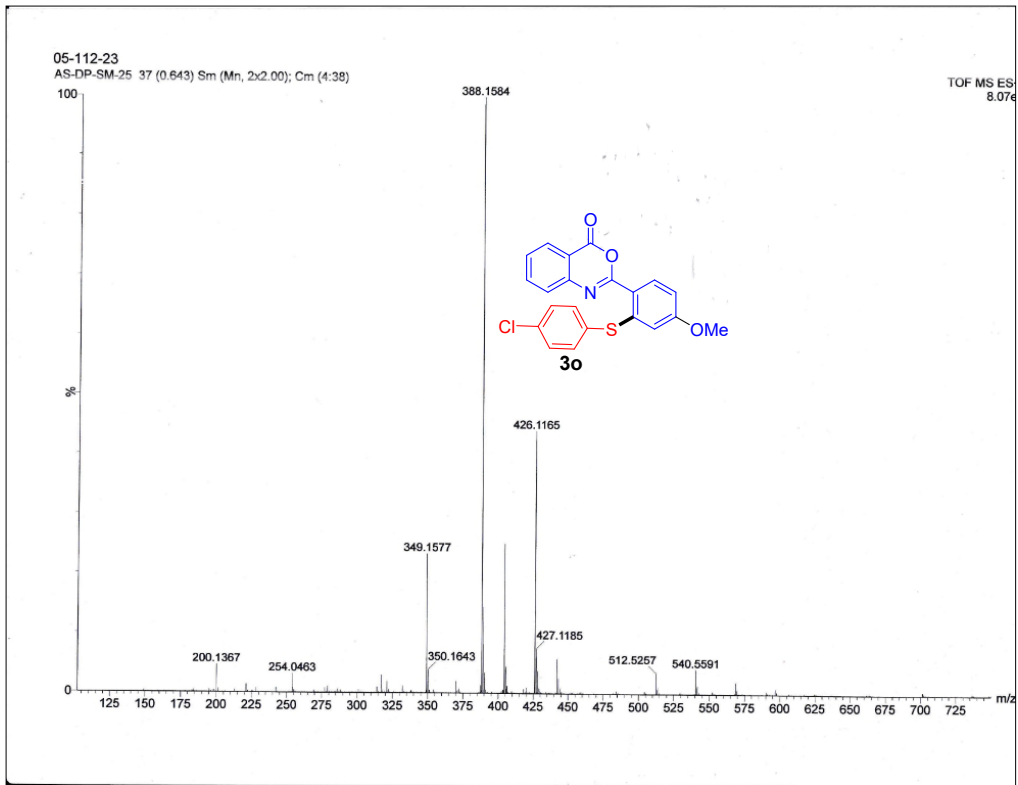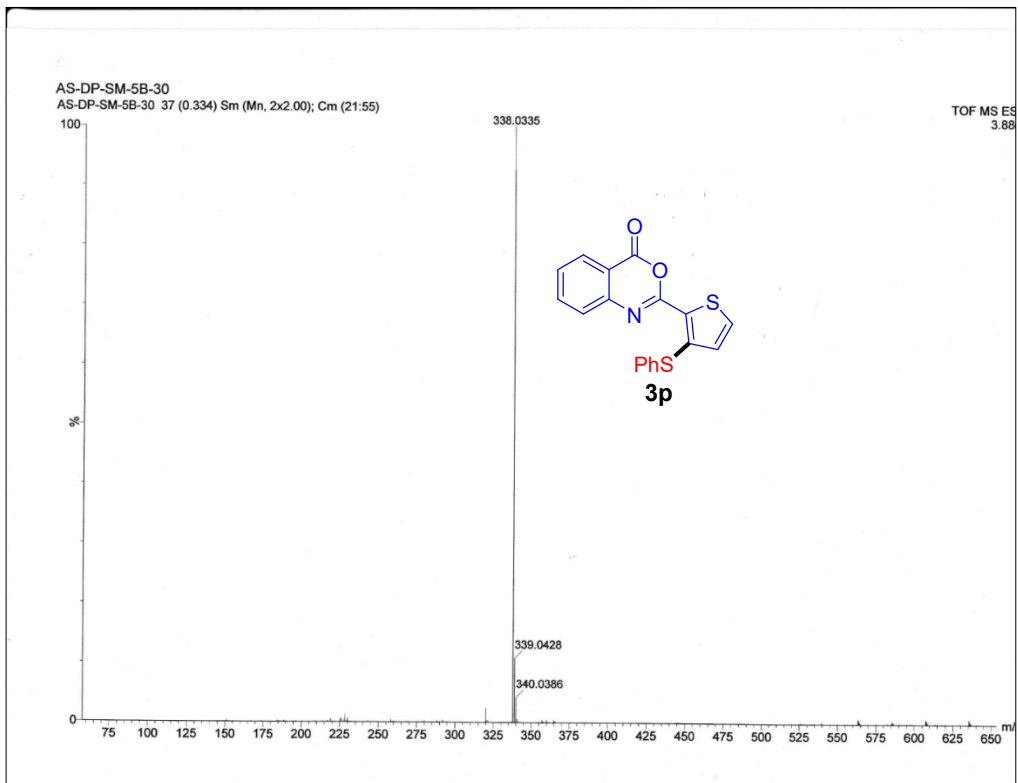

Single Mass Analysis

Tolerance = 2.0 mDa DBE min = 1.5 max = 50.0  
Element prediction: O#  
Number of isotope peaks used for FIT = 3  
Monoisotopic Mass, Odd and Even Electron Ions  
252 formulas evaluated with 1 results within limits (up to 50 best isotopic matches for each mass)

Elements Used:

| Mass     | Calc. Mass | mDa | PPM | DBE  | Formula                                                         | FIT   | 1-FIT | Norm. | Fit | Unfit | N | O | S |
|----------|------------|-----|-----|------|-----------------------------------------------------------------|-------|-------|-------|-----|-------|---|---|---|
| 346.0912 | 346.0902   | 1.0 | 2.9 | 14.5 | C <sub>21</sub> H <sub>16</sub> N <sub>2</sub> O <sub>2</sub> S | 678.3 | n/a   |       | 21  | 16    | 2 | 1 | 1 |

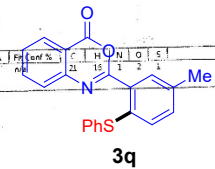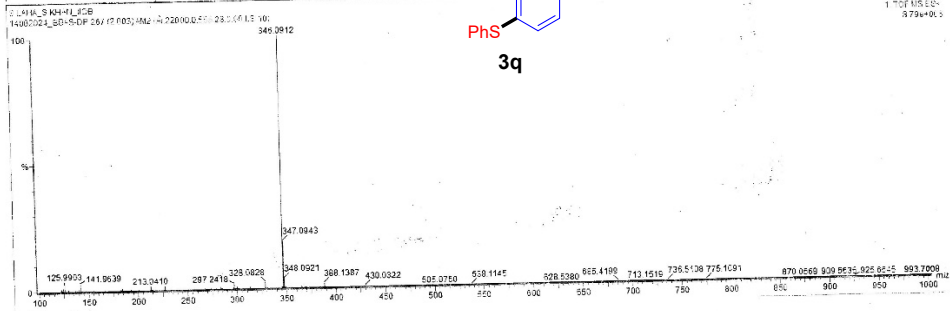

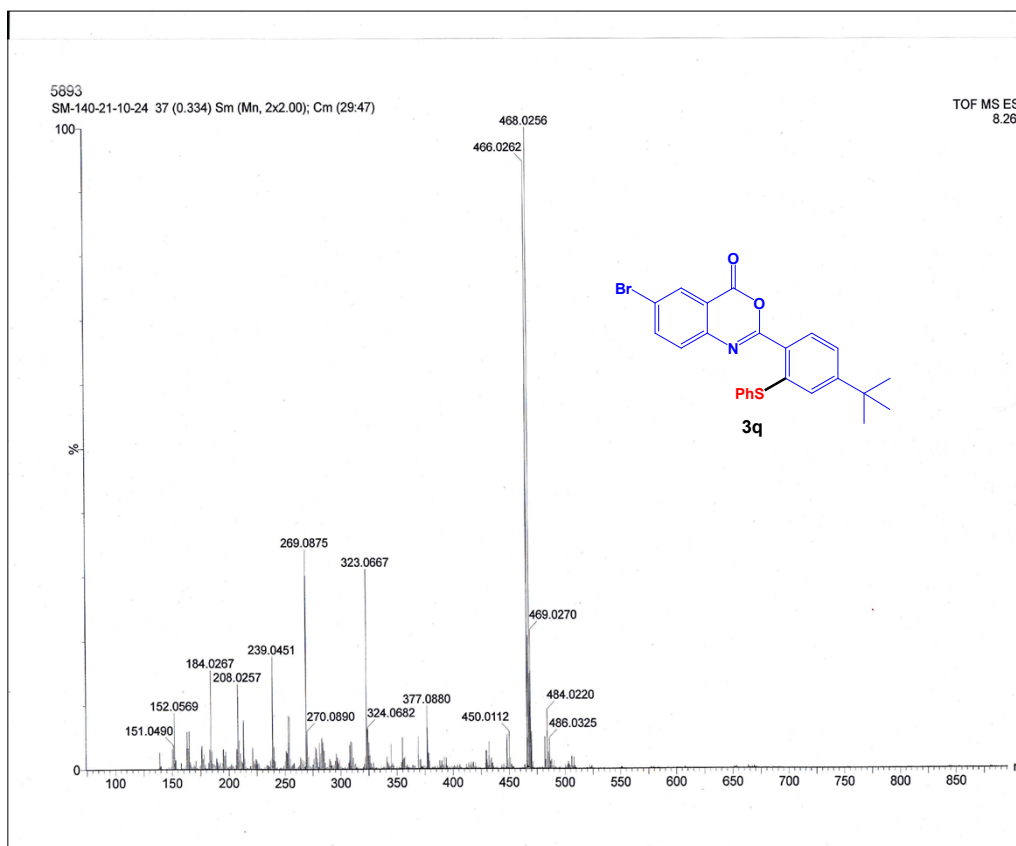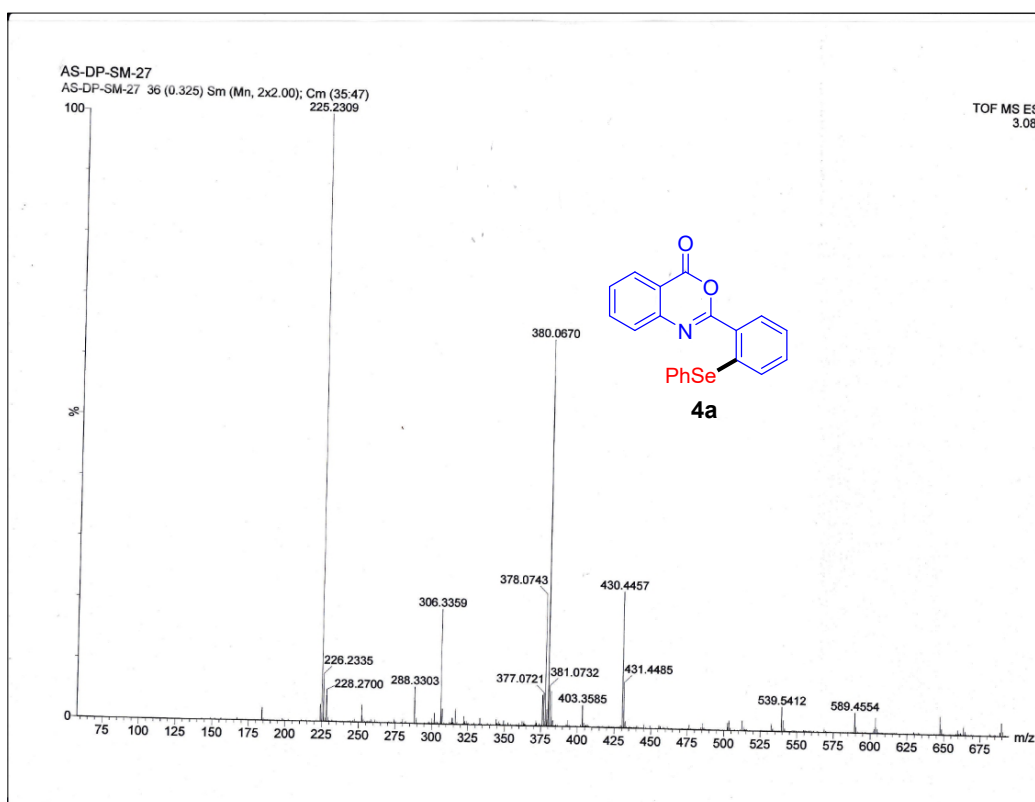

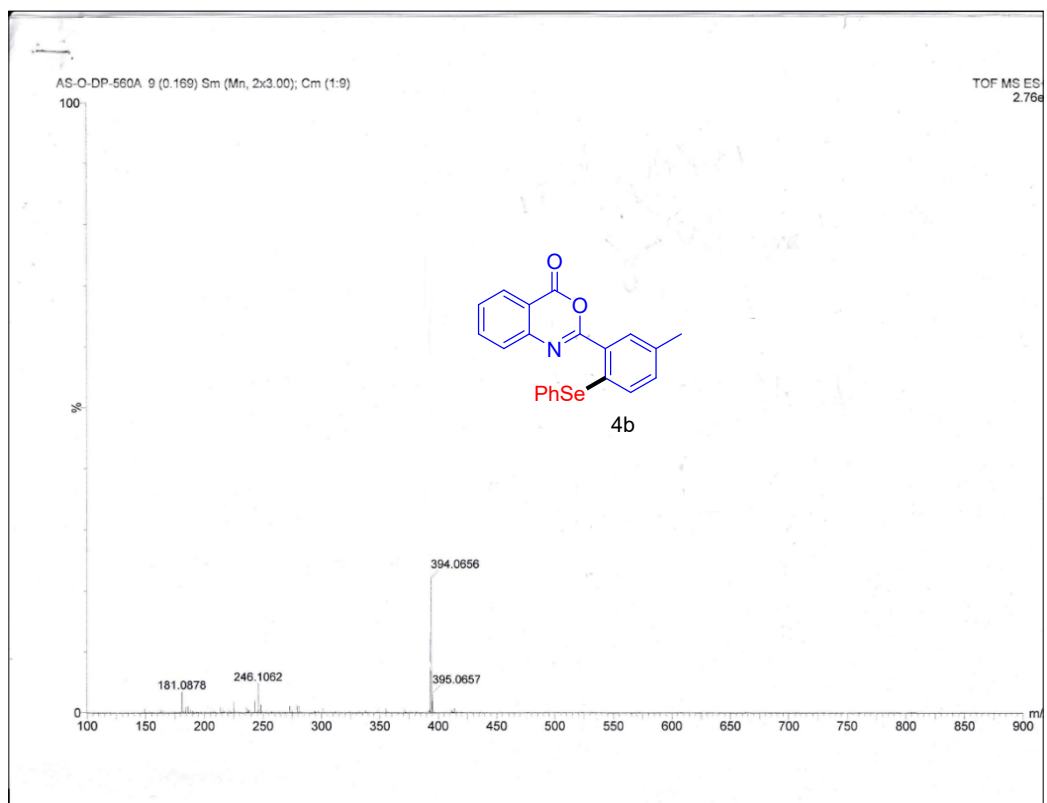

## 8. LCMS and ESI-MS spectra:

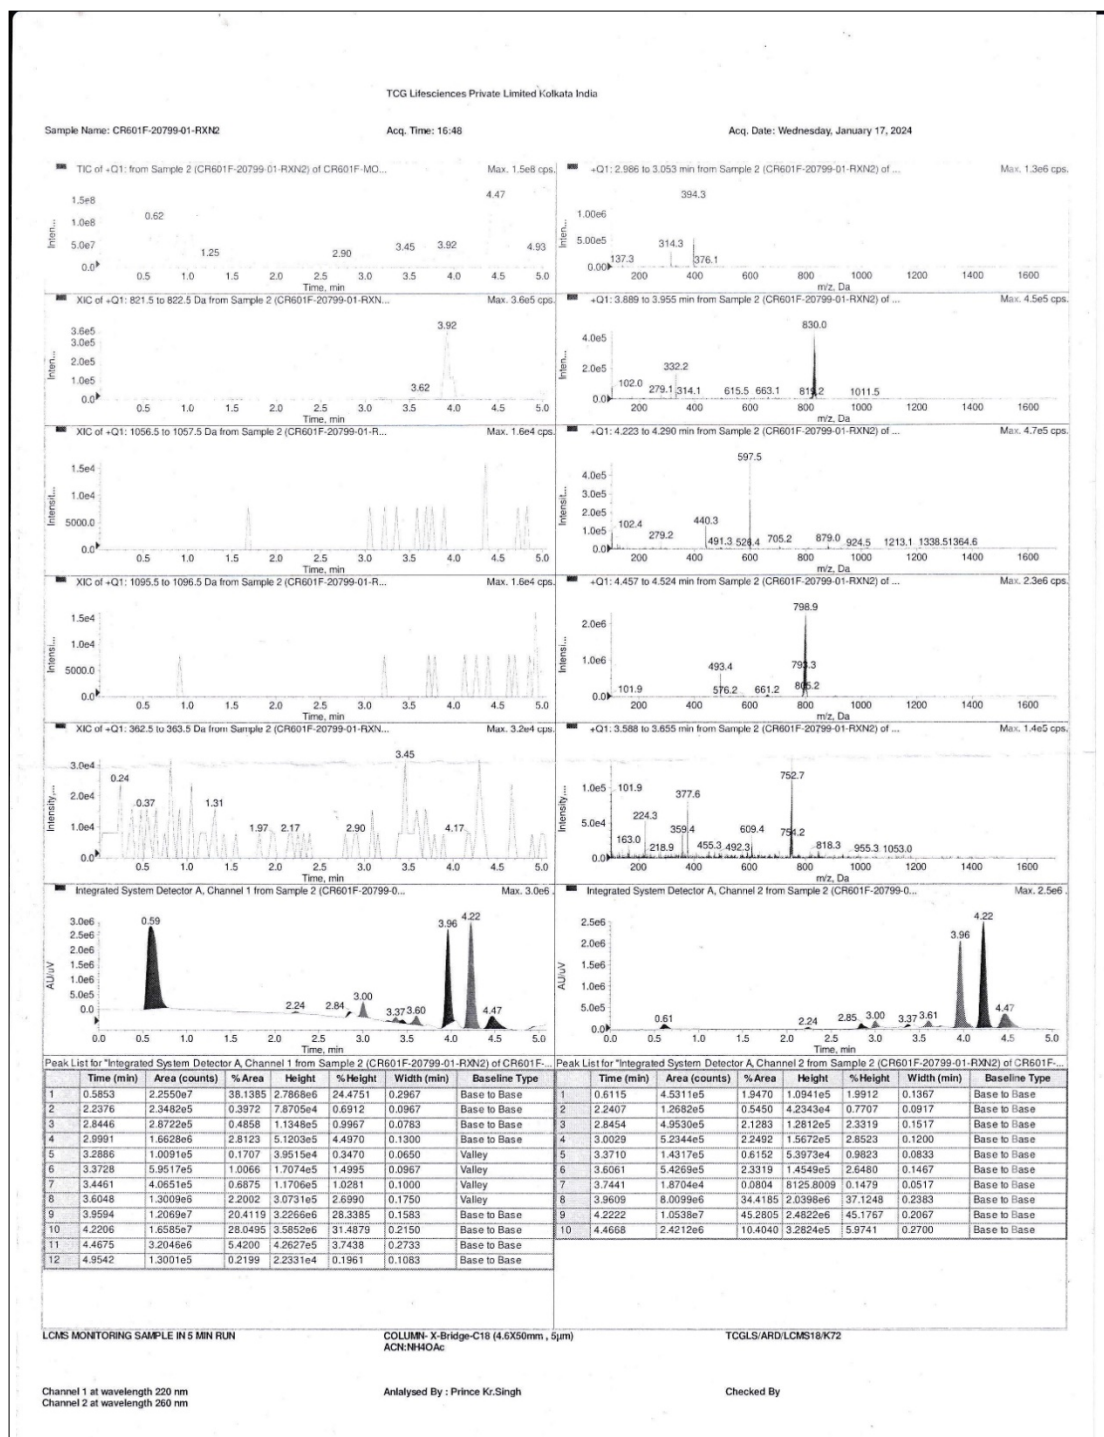

**Figure 1.** LCMS spectra of the crude reaction mixture (Scheme 4c of manuscript)

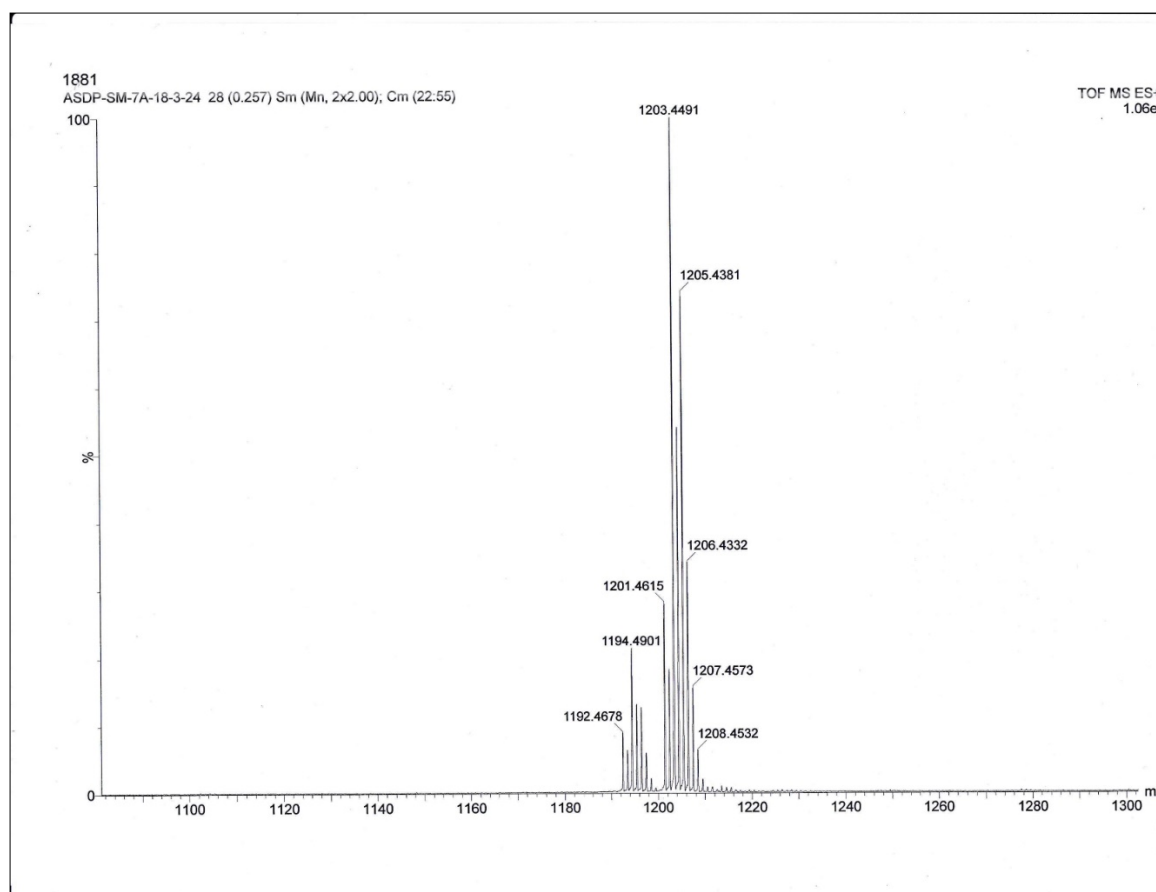

**Figure 2.** ESI-MS spectra of the crude reaction mixture (Scheme 4c of manuscript)

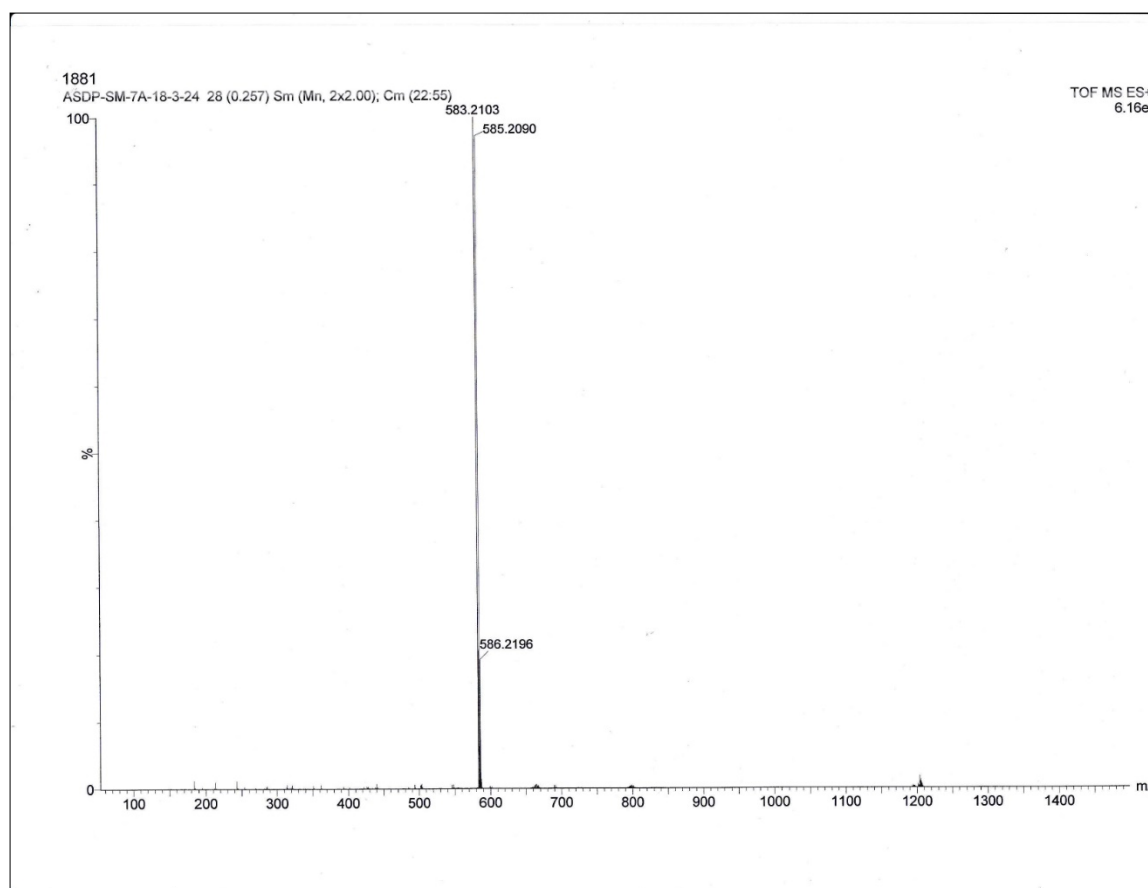

**Figure 3.** ESI-MS spectra of the crude reaction mixture (Scheme 4c of manuscript)

## 9. X-ray Crystallography Data:

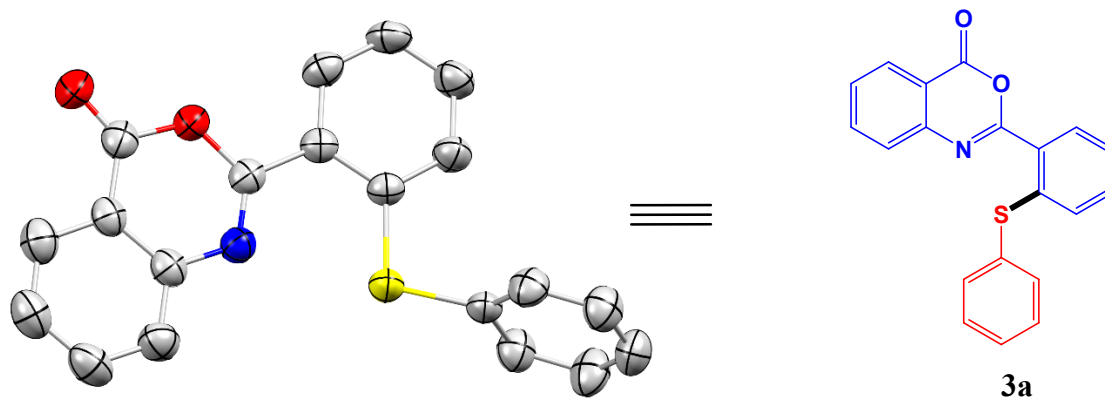

**Figure 4.** ORTEP diagram of the crystal structure of **3a** at 50% probability level

Details of the crystal structure investigation can be obtained from the Cambridge crystallographic data centre, 12 Union Road, Cambridge, CB2 1EZ, UK. (**3a**: CCDC deposition no 2302174).



## Crystallographic data and structural refinement parameters for 3a

|                                                                               | <b>3a</b>                                         |
|-------------------------------------------------------------------------------|---------------------------------------------------|
| Formula                                                                       | C <sub>20</sub> H <sub>13</sub> NO <sub>2</sub> S |
| Formula weight                                                                | 331.31                                            |
| Crystal system                                                                | triclinic                                         |
| Space group                                                                   | P-1                                               |
| <i>a</i> /Å                                                                   | 7.8169(5)                                         |
| <i>b</i> /Å                                                                   | 8.3525(6)                                         |
| <i>c</i> /Å                                                                   | 12.4587(8)                                        |
| $\alpha$ /°                                                                   | 81.958(2)                                         |
| $\beta$ /°                                                                    | 82.535(2)                                         |
| $\gamma$ /°                                                                   | 78.805(2)                                         |
| <i>V</i> /Å <sup>3</sup>                                                      | 785.68(9)                                         |
| <i>Z</i>                                                                      | 2                                                 |
| <i>D<sub>c</sub></i> /g cm <sup>-3</sup>                                      | 1.401                                             |
| $\mu$ /mm <sup>-1</sup>                                                       | 0.218                                             |
| <i>F</i> <sub>000</sub>                                                       | 344                                               |
| $\theta$ range/°                                                              | 2.5, 27.5                                         |
| reflections collected                                                         | 24491                                             |
| unique reflections                                                            | 3566                                              |
| reflections <i>I</i> > 2 $\sigma$ ( <i>I</i> )                                | 2731                                              |
| <i>R</i> <sub>int</sub>                                                       | 0.088                                             |
| goodness-of-fit ( <i>F</i> <sup>2</sup> )                                     | 1.14                                              |
| <i>R</i> <sub>1</sub> ( <i>I</i> > 2 $\sigma$ ( <i>I</i> )) [ <sup>a</sup> ]  | 0.0666                                            |
| <i>wR</i> <sub>2</sub> ( <i>I</i> > 2 $\sigma$ ( <i>I</i> )) [ <sup>a</sup> ] | 0.1812                                            |
| $\Delta\rho$ min / max /e Å <sup>3</sup>                                      | -0.27, 0.25                                       |

$$^{[a]}R_1 = \frac{\sum ||F_o| - |F_c||}{\sum |F_o|}, wR_2 = \left[ \frac{\sum (w(F_o^2 - F_c^2))^2}{\sum w(F_o^2)^2} \right]^{1/2}$$

## 10. $^1\text{H}$ NMR spectra of deuterium labelling experiment.

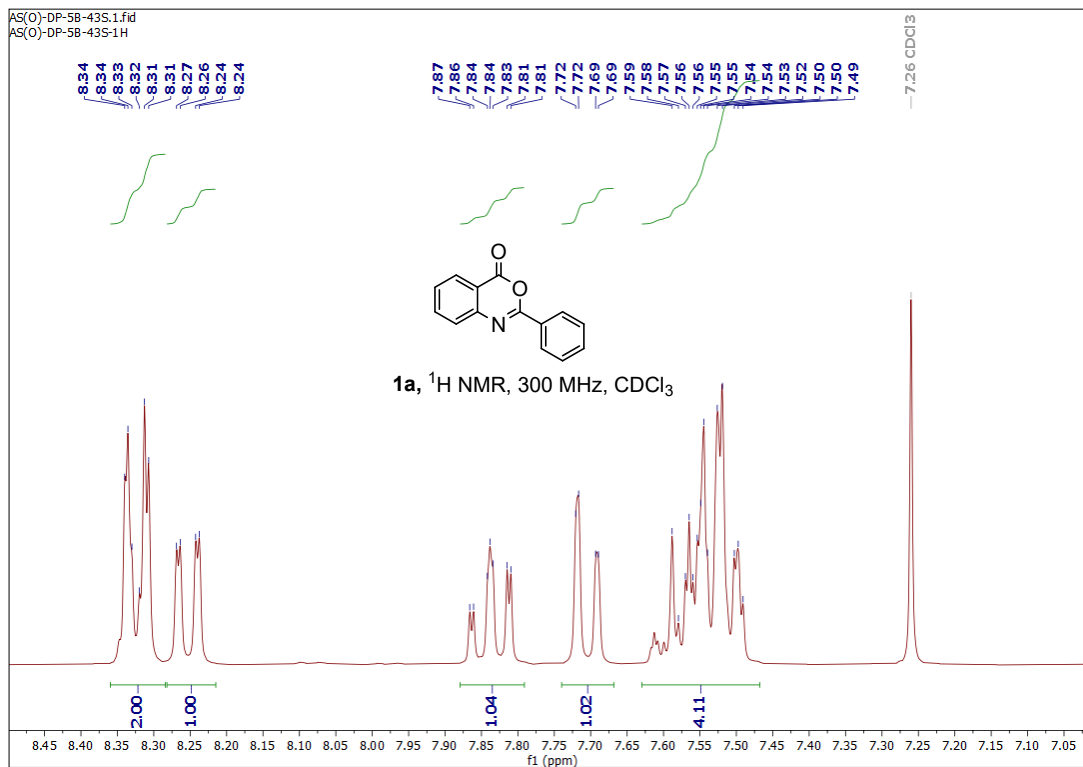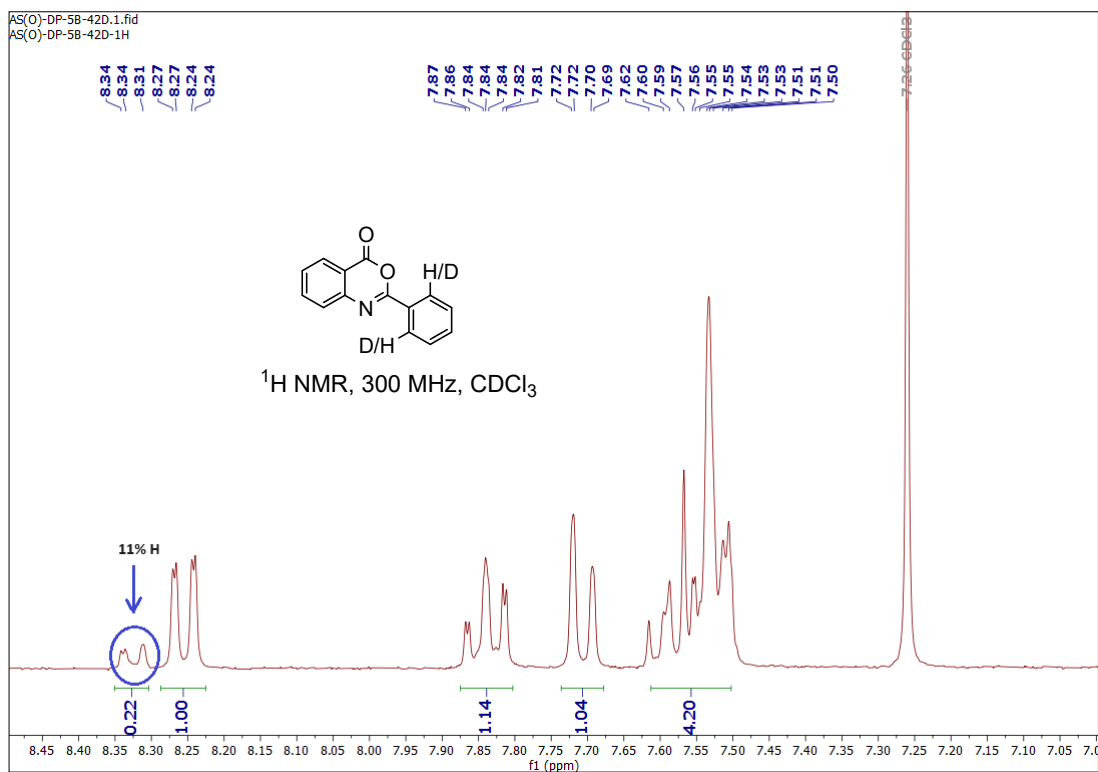

## 11. KIE Experiments

### 2-C<sub>6</sub>D<sub>5</sub>-benzoxazinone substrate

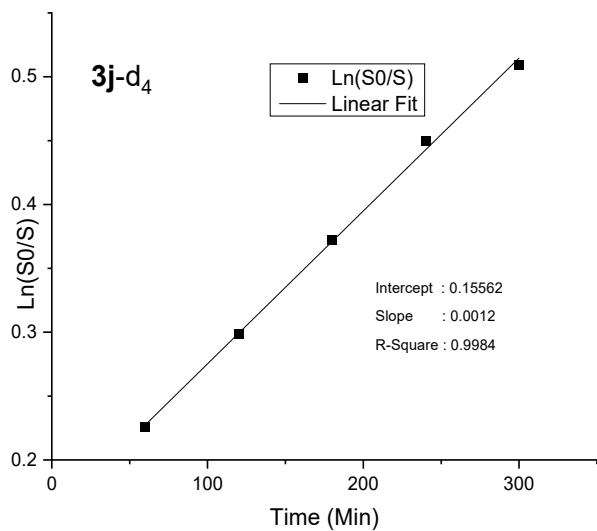

### 2-C<sub>6</sub>H<sub>5</sub>-benzoxazinone substrate

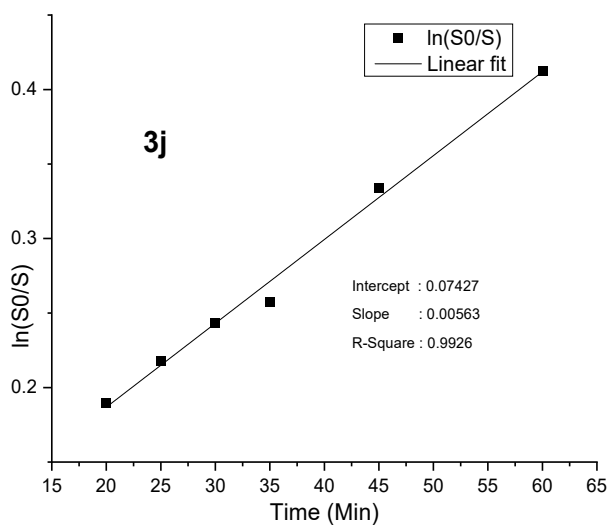

$$K_H/K_D = 0.00563/0.0012 = 4.69$$

$$\frac{K_H}{K_D} = \frac{0.00563}{0.0012} = 4.69$$

HPLC method has been used to determine the yields of the compounds at different time intervals.

12/9/2024 5:19 PM

Chromatogram C:\USERS\KM\DESKTOP\NEW FOLDER\INSTRUMENT 1 - 12\_6\_2024 5\_41\_44 PM.PRM

Page 1 of 1

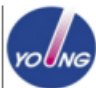

**DEPARTMENT OF CHEMISTRY**  
JADAVPUR UNIVERSITY  
KOLKATA

Column : Venusil XPB C18(4.8x250mm), 100Åns.  
Mobile Phase : ACN: WATER85:15  
Flow Rate : 2.0 mL/min  
Note : AS 70

Detection : 254 nm  
Temperature : RT  
Pressure :

Autostop : 5.00 min  
Detector 1 : Channel 1  
Subtraction Chromatogram : (None)

External Start : Start - Restart, Down  
Range 1 : Bipolar, 10000 mV, 10 Samp. per Sec.  
Matching : No Change

Base : Not Used  
Scale Factor : Not Used  
Unretained Time : 0.00 min  
Result Table Reports : All Peaks

Calibration File : None  
Units After Scaling : Not Used  
Column Length : 50.00 mm  
Hide ISTD Peak : Enabled

Calculation : Uncal  
Uncal. Response : 0  
Column Calc. : From Width at 50% of Height

## 12. References

1. D. Patra, A. Saha, *Eur. J. Org.Chem.* **2022**, e202201042.
2. SMART (V 5.628), SAINT (V 6.45a), XPREP, SHELXTL; Bruker AXS Inc.: Madison, WI, **2004**.
3. G. M. Sheldrick, SADABS, Version 2.03; University of Göttingen: Germany, **2002**.
4. G. M. Sheldrick, SHELX 2016/6: University of Göttingen, Göttingen, Germany, **2014**.
5. L. J. Farrugia, *J. Appl. Crystallogr.* **1999**, 32, 837–838.
6. C. F. Macrae, P. R. Edgington, P. McCabe, E. Pidcock, G. P. Shields, R. Taylor, M. Towler, J. V. D. Streek, *J. Appl. Cryst.* **2006**, 39, 453–457.
7. M. Iwasaki, M. Iyanaga, Y. Tsuchiya, Yugo. Nishimura, W. Li, Z. Li, Y. Nishihara, *Chem. Eur. J.* **2014**, 20, 2459 – 2462.
8. Y. He, S. Hou, J. Hu, *Tetrahedron*, **2022**,103, 132552.
